# Supplementary material
Source: publisher figshare collection journal article supplement (https://acs.figshare.com/ndownloader/files/30442420)

## **Supporting Information**

### **Ruthenium(II)-Catalyzed Regioselective C–H Olefination of Aromatic Ketones and Amides with Allyl Sulfones**

Suman Dana, Chandan Kumar Giri, and Mahiuddin Baidya\*

*Department of Chemistry, Indian Institute of Technology Madras, Chennai 600036, Tamil Nadu, India*

[mbaidya@iitm.ac.in](mailto:mbaidya@iitm.ac.in)

## Table of Contents

|    |                                                                                                             |     |
|----|-------------------------------------------------------------------------------------------------------------|-----|
| 1  | <b>General information</b>                                                                                  | S2  |
| 2  | <b>References</b>                                                                                           | S3  |
| 3  | <b>Typical Ru(II)-catalyzed C–H olefination of aromatic ketones (1) with allyl sulfones (2)</b>             | S4  |
| 4  | <b>Typical scaled-up Ru(II)-catalyzed C–H olefination of aromatic ketones (1a) with allyl sulfones (2a)</b> | S4  |
| 5  | <b>Typical Ru(II)-catalyzed C–H olefination of aromatic amides (4) with allyl sulfones (2)</b>              | S5  |
| 6  | <b>Typical formal 1,2-carboamination of allyl sulfones (6)</b>                                              | S6  |
| 7  | <b>Typical intramolecular aldol reaction (synthesis of 7)</b>                                               | S6  |
| 8  | <b>The role of cationic complex</b>                                                                         | S7  |
| 9  | <b>Radical scavengers study</b>                                                                             | S7  |
| 10 | <b>Deuterium exchange studies with ketone</b>                                                               | S8  |
| 11 | <b>Deuterium exchange studies with amide</b>                                                                | S8  |
| 12 | <b>Crystal data and structure refinement for 3l (CCDC No 2070584)</b>                                       | S11 |
| 13 | <b>Crystal data and structure refinement for 6a (CCDC No 2080954)</b>                                       | S12 |
| 14 | <b>NMR spectroscopic data of synthesized compounds</b>                                                      | S13 |
| 15 | <b>NMR spectra of synthesized compounds</b>                                                                 | S22 |

## General information

[Ru(*p*-cymene)Cl<sub>2</sub>]<sub>2</sub> was purchased from Alfa Aesar. Acetophenones, benzoic acids, amines, DCE, 1,4-dioxane, and inorganic bases were purchased from Avra chemicals, Spectrochem, and Sigma-Aldrich. AgSbF<sub>6</sub>, KPF<sub>6</sub>, KSbF<sub>6</sub>, and AgBF<sub>4</sub> were purchased from Alfa Aesar and Sigma-Aldrich. All the compounds were utilized without further purification.

All reactions were monitored by thin layer chromatography (TLC) on Merck 60 F 254 precoated silica plates and visualized using a UV lamp (366 or 254 nm) or by use of potassium permanganate, 5 g K<sub>2</sub>CO<sub>3</sub>, / 100 mL water. Products were isolated by column chromatography (Merck silica gel 100-200 μm).

<sup>13</sup>C and <sup>1</sup>H NMR spectra were recorded on a Bruker 400 or Bruker 500 MHz spectrometers. Chemical shift values (δ) are reported in ppm and calibrated to the residual solvent peak- CDCl<sub>3</sub> δ = 7.26 ppm for <sup>1</sup>H, δ = 77.16 ppm for <sup>13</sup>C; DMSO-d<sub>6</sub> δ = 2.51 ppm for <sup>1</sup>H, δ = 39.5 ppm for <sup>13</sup>C; or calibrated to tetramethylsilane (δ = 0.00). All NMR spectra were recorded at ambient temperature (290 K) unless otherwise noted. <sup>1</sup>H NMR spectra are reported as follows: chemical shift (multiplicity, coupling constant, integration). The following abbreviations are used to indicate multiplicities: s, singlet; d, doublet; t, triplet; q, quartet; m, multiplet; dd, doublet of doublet; dt, doublet of triplet; dq, doublet of quartet; td, triplet of doublet; tt, triplet of triplet; dq, doublet of quartet; br, broad.

Mass spectra were recorded by electron spray ionization (ESI) method on a Q-TOF Micro with lock spray source.

X-ray data of the crystals were collected and integrated using a Bruker Axs (Kappa Apex 2) CCD diffractometer equipped with graphite monochromatic Mo (Kα) radiation. The crystal sample was prepared through solvent evaporation method in ethyl acetate: hexane (9:1) solvent mixture at room temperature.

## References:

- (5) (c) Bag, S.; Maiti, D. Palladium-Catalyzed Olefination of Aryl C–H Bonds by Using Directing Scaffolds. *Synthesis* **2016**, *48*, 804-815. (d) Manikandan, R.; Jeganmohan, M. Recent Advances in the Ruthenium(ii)-Catalyzed Chelation-Assisted C–H Olefination of Substituted Aromatics, Alkenes and Heteroaromatics with Alkenes *via* the Deprotonation Pathway. *Chem. Commun.* **2017**, *53*, 8931-8947. (e) Ma, W.; Gandeepan, P.; Li, J.; Ackermann, L. Recent Advances in Positional-Selective Alkenylations: Removable Guidance for Twofold C–H Activation. *Org. Chem. Front.* **2017**, *4*, 1435-1467. (f) Mandal, A.; Dana, S.; Chowdhury, D.; Baidya, M. Recent Advancements in Transition-Metal-Catalyzed One-Pot Twofold Unsymmetrical Difunctionalization of Arenes. *Chem. Asian J.* **2019**, *14*, 4074-4086. (g) Ali, W.; Prakash, G.; Maiti, D. Recent Development in Transition Metal-Catalysed C–H Olefination. *Chem. Sci.* **2021**, *12*, 2735-2759.
- (6) (c) Zhang, J.; Shrestha, R.; Hartwig, J. F.; Zhao, P. A Decarboxylative Approach for Regioselective Hydroarylation of Alkynes. *Nat. Chem.* **2016**, *8*, 1144-1151. (d) Spencer, A. R. A.; Korde, R.; Font, M.; Larrosa, I. meta-Selective Olefination of Fluoroarenes with Alkynes Using CO<sub>2</sub> as a Traceless Directing Group. *Chem. Sci.* **2020**, *11*, 4204-4208. Review on Ru(II)-catalyzed vinylation reactions via hydroarylation of alkynes: (e) Manikandan, R.; Jeganmohan, M. Recent Advances in the Ruthenium-Catalyzed Hydroarylation of Alkynes with Aromatics: Synthesis of Trisubstituted Alkenes. *Org. Biomol. Chem.* **2015**, *13*, 10420-10436.
- (7) (d) Singh, K. S.; Dixneuf, P. H. Ruthenium(II)-Catalyzed Alkenylation of Ferrocenyl Ketones via C–H Bond Activation. *Organometallics* **2012**, *31*, 7320-7323. (e) Yadav, M. R.; Rit, R. K.; Shankar, M.; Sahoo, A. K. Sulfoximine-Directed Ruthenium-Catalyzed *ortho*-C–H Alkenylation of (Hetero)Arenes: Synthesis of EP3 Receptor Antagonist Analogue. *J. Org. Chem.* **2014**, *79*, 6123-6134. (f) Ma, W.; Mei, R.; Tenti, G.; Ackermann, L. Ruthenium(II)-Catalyzed Oxidative C–H Alkenylations of Sulfonic Acids, Sulfonyl Chlorides and Sulfonamides. *Chem. Eur. J.* **2014**, *20*, 15248-15251. (g) Manikandan, R.; Madasamy, P.; Jeganmohan, M. Ruthenium-Catalyzed *ortho* Alkenylation of Aromatics with Alkenes at Room Temperature with Hydrogen Evolution. *ACS Catal.* **2016**, *6*, 230-234. (h) Bechtoldt, A.; Tirlor, C.; Raghuvanshi, K.; Warratz, S.; Kornhaaß, C.; Ackermann, L. Ruthenium Oxidase Catalysis for Site-Selective C–H Alkenylations with Ambient O<sub>2</sub> as the Sole Oxidant. *Angew. Chem. Int. Ed.* **2016**, *55*, 264-267. (i) Kumar, N. Y. P.; Bechtoldt, A.; Raghuvanshi, K.; Ackermann, L. Ruthenium(II)-Catalyzed Decarboxylative C–H Activation: Versatile Routes to *meta*-Alkenylated Arenes. *Angew. Chem. Int. Ed.* **2016**, *55*, 6929-6932. (j) Leitch, J. A.; Wilson, P. B.; McMullin, C. L.; Mahon, M. F.; Bhonoah, Y.; Williams, I. H.; Frost, C. G. Ruthenium(II)-Catalyzed C–H Functionalization Using the Oxazolidinone Heterocycle as a Weakly Coordinating Directing Group: Experimental and Computational Insights. *ACS Catal.* **2016**, *6*, 5520-5529. (k) Dana, S.; Mandal, A.; Sahoo, H.; Mallik, S.; Grandhi, G. S.; Baidya, M. Ru(II)-Catalyzed Oxidative *Heck*-Type Olefination of Aromatic Carboxylic Acids with Styrenes through Carboxylate-Assisted C–H Bond Activation. *Org. Lett.* **2018**, *20*, 716-719. (l) Bechtoldt, A.; Baumert, M. E.; Vaccaro, L.; Ackermann, L. Ruthenium(ii) Oxidase Catalysis for C–H Alkenylations in Biomass-Derived  $\gamma$ -Valerolactone. *Green Chem.* **2018**, *20*, 398-402. (m) Mandal, A.; Mehta, G.; Dana, S.; Baidya, M. Streamlined Ruthenium(II) Catalysis for One-Pot 2-fold Unsymmetrical C–H Olefination of (Hetero)Arenes. *Org. Lett.* **2019**, *21*, 5879-5883.



### Typical Ru(II)-catalyzed C–H olefination of aromatic ketones (**1**) with allyl sulfones (**2**):

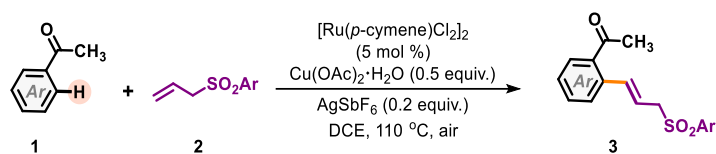

To an oven dried screw cap reaction tube (10×1.5 cm) corresponding aromatic ketone **1** (0.3 mmol, 1.0 equiv.), [Ru(*p*-cymene)Cl<sub>2</sub>]<sub>2</sub> (5 mol %), Cu(OAc)<sub>2</sub>·H<sub>2</sub>O (0.5 equiv.), and olefin **2** (1.5 equiv.) were added. Then the reaction tube was flushed with nitrogen gas for 2-3 minutes and AgSbF<sub>6</sub> (0.2 equiv.) was added in it. Next 0.3 mL DCE was added into the reaction mixture. After stirring the reaction mixture under inert atmosphere for 5 minutes at room temperature, the cap was opened and stirred at room temperature for the next 5 minutes under air. Then the reaction tube was capped, placed in a pre-heated oil bath, and it was stirred at 110 °C for 24 h. After completion (monitored by TLC), the crude reaction mixture was diluted with ethyl acetate and filtered through a celite pad. In order to get pure products **3**, the resulting residue was purified by column chromatography on silica gel with a gradient eluent of hexane and ethyl acetate.

### Typical scaled-up Ru(II)-catalyzed C–H olefination of aromatic ketones (**1a**) with allyl sulfones (**2a**):

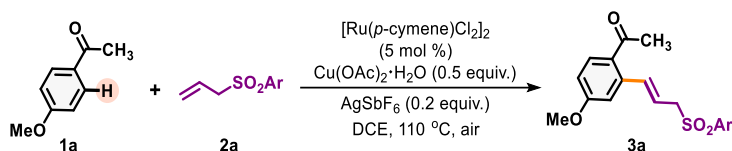

To an oven dried screw cap reaction tube (10×1.5 cm) corresponding aromatic ketone **1a** (450 mg, 3.0 mmol, 1.0 equiv.), [Ru(*p*-cymene)Cl<sub>2</sub>]<sub>2</sub> (5 mol %), Cu(OAc)<sub>2</sub>·H<sub>2</sub>O (0.5 equiv.), and olefin **2a** (1.5 equiv.) were added. Then the reaction tube was flushed with nitrogen gas for 2-3 minutes and AgSbF<sub>6</sub> (0.2 equiv.) was added in it. Next 3.0 mL DCE was added into the reaction mixture. After stirring the reaction mixture under inert atmosphere for 5 minutes at room temperature, the cap was opened and stirred at room temperature for the next five minutes under air. Then the reaction tube was capped, placed in a pre-heated oil bath and it was stirred at 110 °C for 24 h. After completion (monitored by TLC), the crude reaction mixture was diluted with ethyl acetate and filtered through a celite pad. In order to get pure products **3a**, the resulting residue was purified by column chromatography on silica gel with a gradient eluent of hexane and ethyl acetate. Yield obtained= 65% (0.6435 gm).

### Typical Ru(II)-catalyzed C–H olefination of aromatic amides (**4**) with allyl sulfones (**2**):

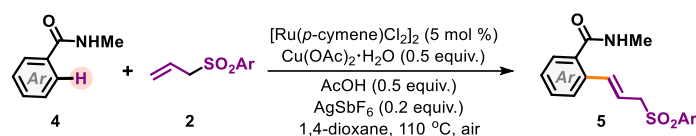

To an oven dried screw cap reaction tube (10×1.5 cm) corresponding aromatic amide **4** (0.3 mmol, 1.0 equiv.),  $[\text{Ru}(p\text{-cymene})\text{Cl}_2]_2$  (5 mol %),  $\text{Cu}(\text{OAc})_2 \cdot \text{H}_2\text{O}$  (0.5 equiv.),  $\text{AcOH}$  (0.5 equiv.), and olefin **2** (1.5 equiv.) were added. Then the reaction tube was flushed with nitrogen gas for 2-3 minutes and  $\text{AgSbF}_6$  (0.2 equiv.) was added in it. Next 0.5 mL 1,4-dioxane was added into the reaction mixture. After stirring the reaction mixture under air atmosphere for 5 minutes at room temperature, it was capped. Then the reaction tube was placed in a pre-heated oil bath and stirred at 110 °C for 24 h. After completion (monitored by TLC), the crude reaction mixture was diluted with ethyl acetate and filtered through a celite pad. In order to get pure products **5**, the resulting residue was purified by column chromatography on silica gel with a gradient eluent of hexane and ethyl acetate.

### Typical formal 1,2-carboamination of allyl sulfones (6):

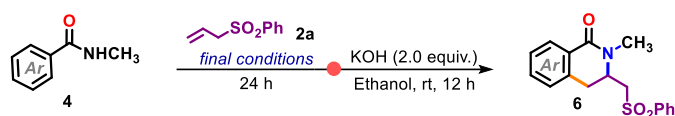

To an oven dried screw cap reaction tube (10×1.5 cm) corresponding aromatic amide **4** (0.3 mmol, 1.0 equiv.), [Ru(*p*-cymene)Cl<sub>2</sub>]<sub>2</sub> (5 mol %), Cu(OAc)<sub>2</sub>·H<sub>2</sub>O (0.5 equiv.), AcOH (0.5 equiv.), and olefin **2a** (1.5 equiv.) were added. Then the reaction tube was flushed with nitrogen gas for 2-3 minutes and AgSbF<sub>6</sub> (0.2 equiv.) was added in it. Next 0.5 mL 1,4-dioxane was added into the reaction mixture. After stirring the reaction mixture under air atmosphere for 5 minutes at room temperature, it was capped. Then the reaction tube was placed in a pre-heated oil bath and stirred at 110 °C for 24 h. After completion (monitored by TLC), the solvent was evaporated and to the crude reaction mixture KOH (2.0 equiv.) was added along with the addition of 0.5 mL EtOH. The reaction mixture was stirred at room temperature for another 12 h under air. After completion (monitored by TLC), the reaction mixture was diluted with ethyl acetate and filtered through a celite pad. In order to get pure product **6**, the resulting residue was purified by column chromatography on silica gel with a gradient eluent of hexane-ethyl acetate mixture.

### Typical intramolecular aldol reaction (synthesis of 7):

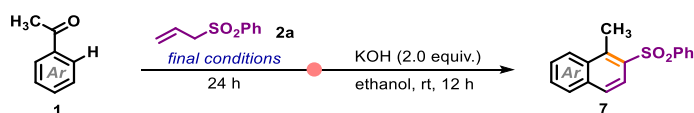

To an oven dried screw cap reaction tube (10 × 1.5 cm) corresponding product **3** (0.3 mmol, 1.0 equiv.) and KOH (2.0 equiv.) was added followed by the addition of 0.5 mL EtOH. The reaction tube was capped and then the reaction mixture was stirred at room temperature for 12 h under air. After completion (monitored by TLC), the reaction mixture was diluted with ethyl acetate and filtered through a celite pad. In order to get pure product **7**, the resulting residue was purified by column chromatography on silica gel with a gradient eluent of hexane-ethyl acetate mixture.

## Mechanistic Studies:

### a) The role of cationic complex:

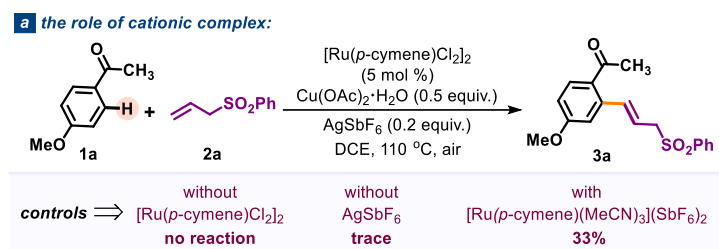

To three separate oven dried screw cap reaction tubes (10×1.5 cm) corresponding aromatic ketone **1a** (0.3 mmol, 1.0 equiv.),  $\text{Cu}(\text{OAc})_2 \cdot \text{H}_2\text{O}$  (0.5 equiv.), and olefin **2a** (1.5 equiv.) were added.

*In reaction tube 1*,  $[\text{Ru}(p\text{-cymene})\text{Cl}_2]_2$  was not added. However,  $\text{AgSbF}_6$  (0.2 equiv.) was added in it.

*In reaction tube 2*,  $[\text{Ru}(p\text{-cymene})\text{Cl}_2]_2$  (5 mol %) was added. However,  $\text{AgSbF}_6$  was excluded.

*In reaction tube 3*, both  $[\text{Ru}(p\text{-cymene})\text{Cl}_2]_2$  and  $\text{AgSbF}_6$  were not added. Instead,  $[\text{Ru}(p\text{-cymene})(\text{MeCN})_3] \text{SbF}_6$  (10 mol %) was added in it.

Next 0.3 mL DCE was added in each of them. Then the reaction tube was capped following the standard method, placed in a pre-heated oil bath and it was stirred at 110 °C for 24 h under air. After completion (monitored by TLC), the crude reaction mixture was diluted with ethyl acetate and filtered through a celite pad. While in reaction tubes 1 and 2, almost no product formation was observed, from reaction tube 3, 33% of the product **3a** was isolated.

### b) Radical Scavengers Study:

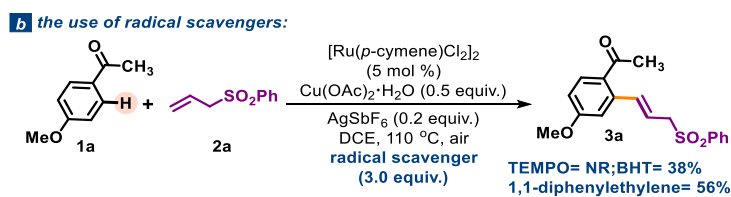

To an oven dried screw cap reaction tube (10×1.5 cm) corresponding aromatic ketone **1a** (0.3 mmol, 1.0 equiv.),  $[\text{Ru}(p\text{-cymene})\text{Cl}_2]_2$  (5 mol %),  $\text{Cu}(\text{OAc})_2 \cdot \text{H}_2\text{O}$  (0.5 equiv.), olefin **2a** (1.5 equiv.), and radical scavengers (3.0 equiv.) were added. Then the reaction tube was flushed with nitrogen gas for 2-3 minutes and  $\text{AgSbF}_6$  (0.2 equiv.) was added in it. Next 0.3 mL DCE was added into reaction mixture. After stirring the reaction mixture under inert atmosphere for 5 minutes at room temperature, the cap was opened and stirred at room temperature for the next

5 minutes. Then the reaction tube was capped, placed in a pre-heated oil bath and it was stirred at 110 °C for 24 h under air. After completion (monitored by TLC), the crude reaction mixture was diluted with ethyl acetate and filtered through a celite pad. In order to get pure products **3**, the resulting residue was purified by column chromatography on silica gel with a gradient eluent of hexane and ethyl acetate.

### c) Deuterium exchange studies with ketone:

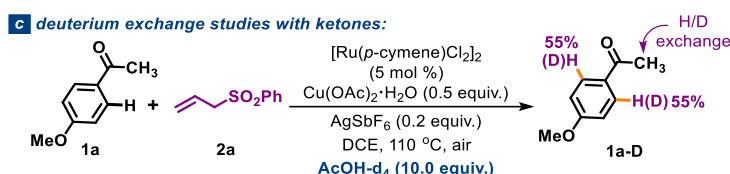

In an oven dried screw cap reaction tubes (10×1.5 cm) corresponding aromatic ketone **1a** (0.3 mmol, 1.0 equiv.),  $[\text{Ru}(p\text{-cymene})\text{Cl}_2]_2$  (5 mol %),  $\text{Cu}(\text{OAc})_2 \cdot \text{H}_2\text{O}$  (0.5 equiv.), olefin **2a** (1.5 equiv.), and radical scavengers (3.0 equiv.) were added. Then the reaction tubes were flushed with nitrogen gas for 2-3 minutes and  $\text{AgSbF}_6$  (0.2 equiv.) was added in it. Next 0.3 mL DCE was added in each of them. After stirring the reaction mixture under inert atmosphere for 5 minutes at room temperature, the cap was opened and stirred at room temperature for the next 5 minutes. In the reaction tube,  $\text{CD}_3\text{COOD}$  (10.0 equiv.) was added. Then the reaction tube was capped, placed in a pre-heated oil bath and it was stirred at 110 °C for 12 h under air. After completion (monitored by TLC), the crude reaction mixture was diluted with ethyl acetate and filtered through a celite pad. The deuterium incorporation was studied from isolated ketone **1a**.

### d) Deuterium exchange studies with amide:

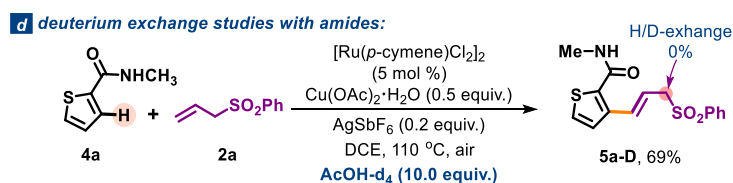

To an oven dried screw cap reaction tube (10×1.5 cm) corresponding aromatic amide **4a** (0.3 mmol, 1.0 equiv.),  $[\text{Ru}(p\text{-cymene})\text{Cl}_2]_2$  (5 mol %),  $\text{Cu}(\text{OAc})_2 \cdot \text{H}_2\text{O}$  (0.5 equiv.), and olefin **2a** (1.5 equiv.) were added. Then the reaction tube was flushed with nitrogen gas for 2-3 minutes and  $\text{AgSbF}_6$  (0.2 equiv.) was added in it. Next 0.5 mL 1,4-dioxane and  $\text{CD}_3\text{COOD}$  (10.0 equiv.) were added into reaction mixture. After stirring the reaction mixture under air atmosphere for 5 minutes at room temperature, it was capped. Then the reaction tube was placed in a pre-heated oil bath and stirred at 110 °C for 10 h under air. After completion (monitored by TLC),

the crude reaction mixture was diluted with ethyl acetate and filtered through a celite pad. In order to get pure product **5a**, the resulting residue was purified by column chromatography on silica gel with a gradient eluent of hexane and ethyl acetate. The deuterium incorporation was studied from isolated product **5a**.

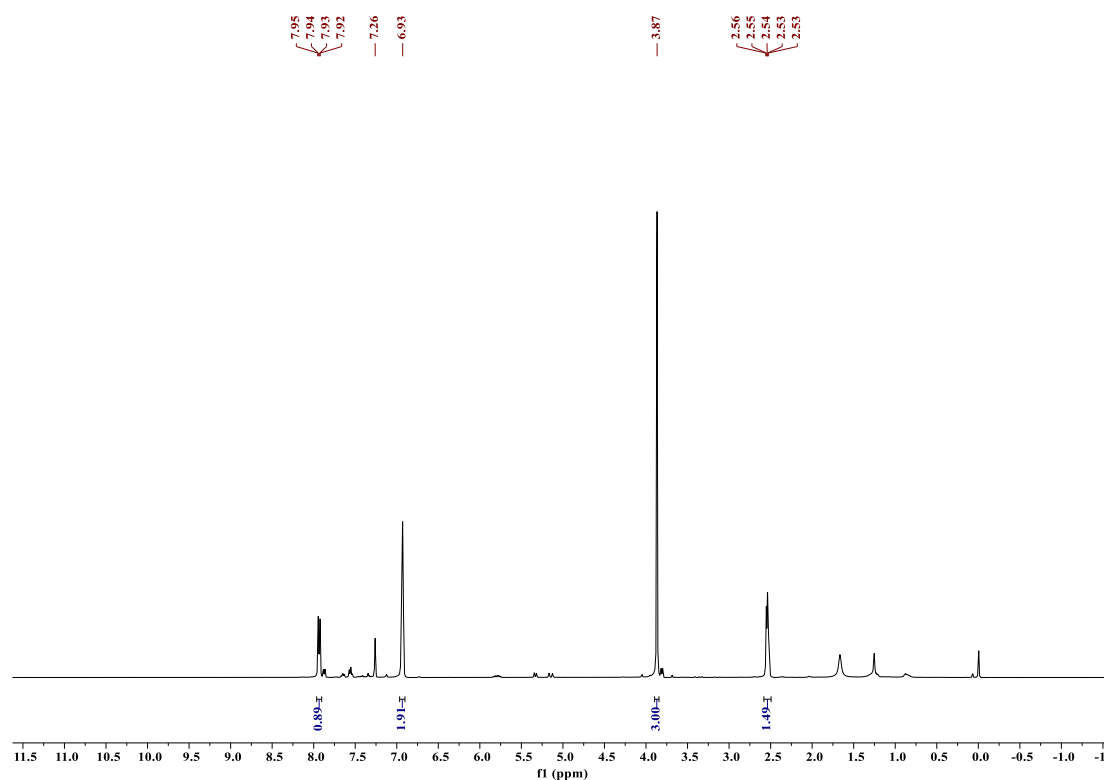

**Figure S1.** Deuterium exchange experiment with **1a** using  $\text{CD}_3\text{CO}_2\text{D}$ .

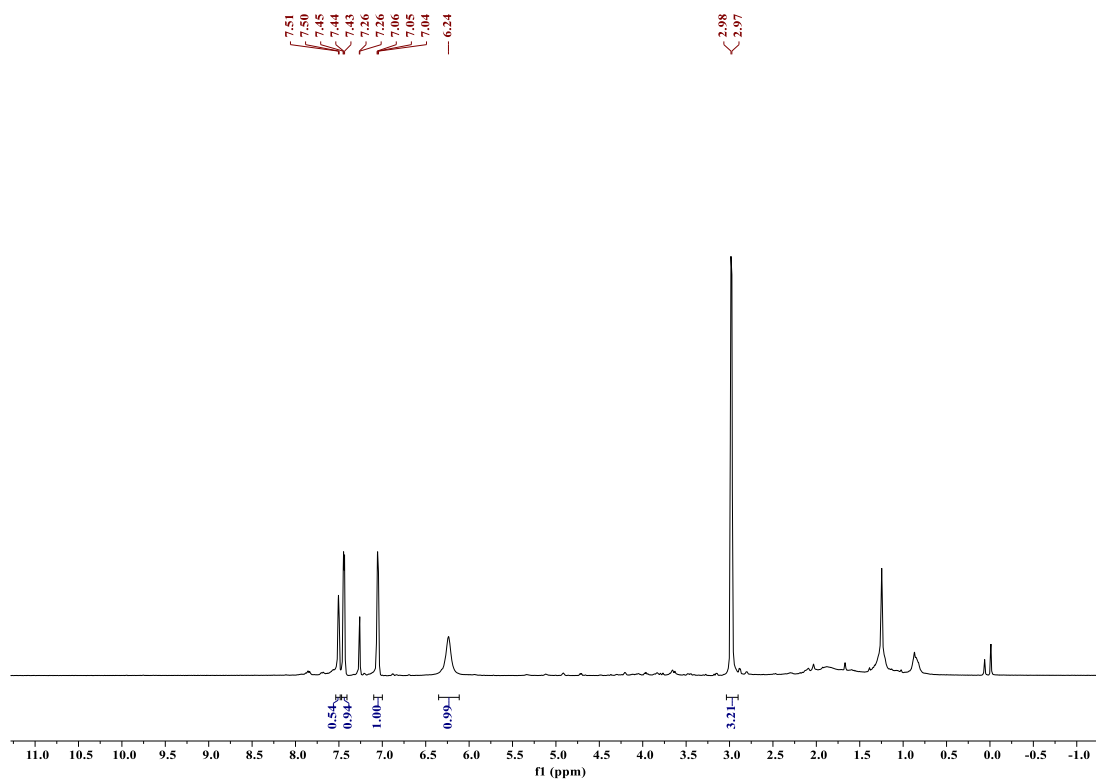

**Figure S2.** Deuterium exchange experiment with **4e**.

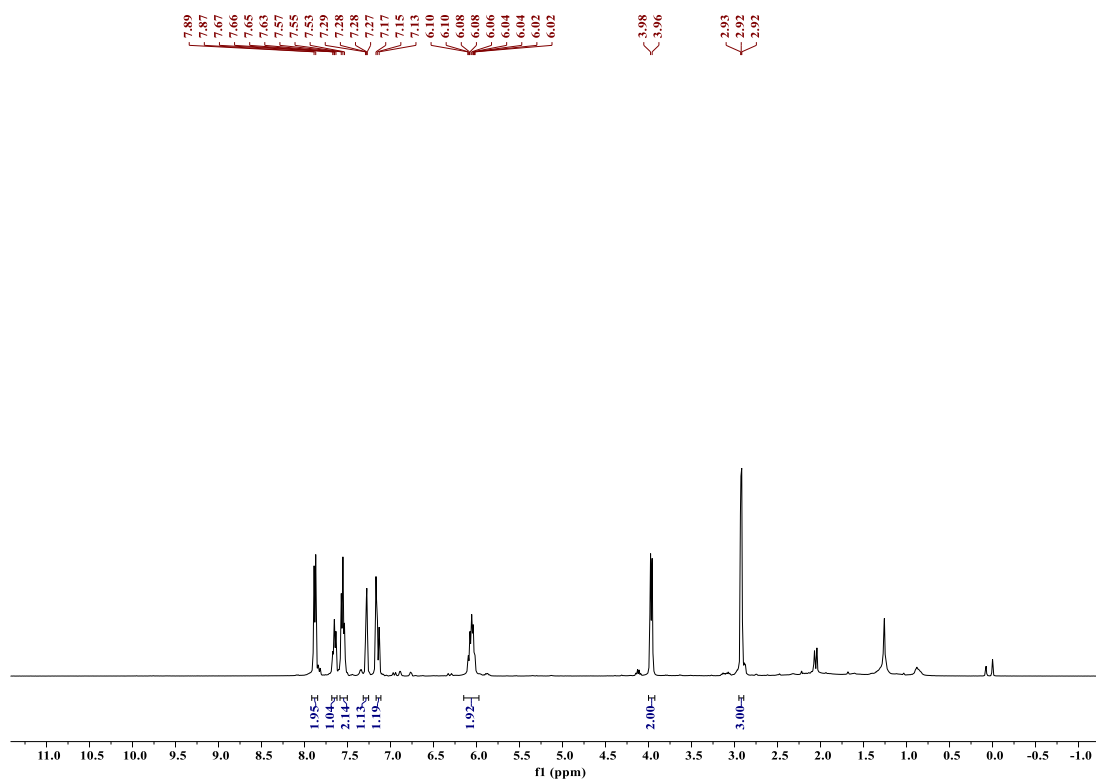

**Figure S3.** NMR Spectra of isolated **5e** after deuterium exchange experiment.

**Crystal data and structure refinement for 3l (CCDC No 2070584):**

|                                   |                                                                                                                                             |
|-----------------------------------|---------------------------------------------------------------------------------------------------------------------------------------------|
| Identification code               | <b>3l</b>                                                                                                                                   |
| Empirical formula                 | $C_{21}H_{18}O_3S$                                                                                                                          |
| Formula weight                    | 350.41                                                                                                                                      |
| Temperature                       | 296(2) K                                                                                                                                    |
| Wavelength                        | 0.71073 Å                                                                                                                                   |
| Crystal system, space group       | Triclinic, P-1                                                                                                                              |
| Unit cell dimensions              | $a = 7.7123(4)$ Å $\alpha = 105.665(2)$ deg.<br>$b = 10.2924(5)$ Å $\beta = 95.392(2)$ deg.<br>$c = 11.6131(6)$ Å $\gamma = 91.621(2)$ deg. |
| Volume                            | $882.27(8)$ Å <sup>3</sup>                                                                                                                  |
| Z, Calculated density             | 2, 1.319 Mg/m <sup>3</sup>                                                                                                                  |
| Absorption coefficient            | 0.200 mm <sup>-1</sup>                                                                                                                      |
| F(000)                            | 368                                                                                                                                         |
| Crystal size                      | 0.250 x 0.220 x 0.100 mm                                                                                                                    |
| Theta range for data collection   | 1.831 to 24.999 deg.                                                                                                                        |
| Limiting indices                  | $-8 \leq h \leq 9$ , $-12 \leq k \leq 12$ , $-13 \leq l \leq 13$                                                                            |
| Reflections collected / unique    | 11705 / 3104 [R(int) = 0.0201]                                                                                                              |
| Completeness to theta = 24.999    | 100.0 %                                                                                                                                     |
| Absorption correction             | None                                                                                                                                        |
| Refinement method                 | Full-matrix least-squares on F <sup>2</sup>                                                                                                 |
| Data / restraints / parameters    | 3104 / 0 / 228                                                                                                                              |
| Goodness-of-fit on F <sup>2</sup> | 1.034                                                                                                                                       |
| Final R indices [I > 2σ(I)]       | R1 = 0.0357, wR2 = 0.0922                                                                                                                   |
| R indices (all data)              | R1 = 0.0414, wR2 = 0.0982                                                                                                                   |
| Extinction coefficient            | 0.067(4)                                                                                                                                    |
| Largest diff. peak and hole       | 0.227 and -0.261 e.Å <sup>-3</sup>                                                                                                          |

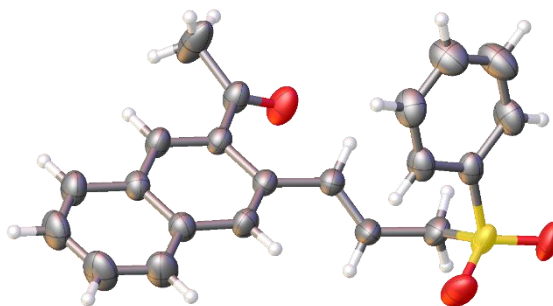

Ellipsoid contour % probability levels = 50%



**Crystal data and structure refinement for 6a (CCDC No 2080954):**

|                                   |                                                                                                                                     |
|-----------------------------------|-------------------------------------------------------------------------------------------------------------------------------------|
| Identification code               | <b>6a</b>                                                                                                                           |
| Empirical formula                 | C <sub>15</sub> H <sub>15</sub> NO <sub>3</sub> S <sub>2</sub>                                                                      |
| Formula weight                    | 321.40                                                                                                                              |
| Temperature                       | 296(2) K                                                                                                                            |
| Wavelength                        | 0.71073 Å                                                                                                                           |
| Crystal system, space group       | Triclinic, P-1                                                                                                                      |
| Unit cell dimensions              | a = 8.3007(6) Å    alpha = 67.294(3) deg.<br>b = 9.6260(7) Å    beta = 73.333(3) deg.<br>c = 10.5879(6) Å    gamma = 89.438(3) deg. |
| Volume                            | 742.76(9) Å <sup>3</sup>                                                                                                            |
| Z, Calculated density             | 2, 1.437 Mg/m <sup>3</sup>                                                                                                          |
| Absorption coefficient            | 0.367 mm <sup>-1</sup>                                                                                                              |
| F(000)                            | 336                                                                                                                                 |
| Crystal size                      | 0.250 x 0.220 x 0.160 mm                                                                                                            |
| Theta range for data collection   | 2.191 to 24.977 deg.                                                                                                                |
| Limiting indices                  | -9 ≤ h ≤ 9, -11 ≤ k ≤ 11, -12 ≤ l ≤ 12                                                                                              |
| Reflections collected / unique    | 10065 / 2610 [R(int) = 0.0282]                                                                                                      |
| Completeness to theta = 24.977    | 100.0 %                                                                                                                             |
| Absorption correction             | None                                                                                                                                |
| Refinement method                 | Full-matrix least-squares on F <sup>2</sup>                                                                                         |
| Data / restraints / parameters    | 2610 / 0 / 192                                                                                                                      |
| Goodness-of-fit on F <sup>2</sup> | 1.056                                                                                                                               |
| Final R indices [I > 2sigma(I)]   | R1 = 0.0366, wR2 = 0.0907                                                                                                           |
| R indices (all data)              | R1 = 0.0416, wR2 = 0.0952                                                                                                           |
| Extinction coefficient            | 0.035(3)                                                                                                                            |
| Largest diff. peak and hole       | 0.387 and -0.376 e.Å <sup>-3</sup>                                                                                                  |

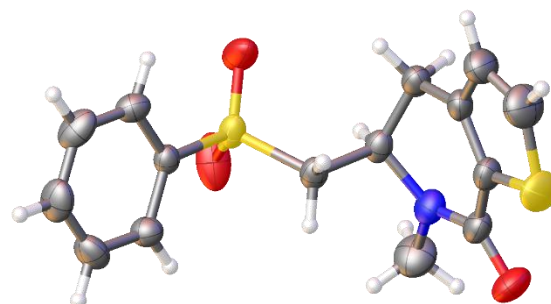

Ellipsoid contour % probability levels = 50%

## NMR spectroscopic data of synthesized compounds:

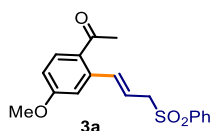

**(E)-1-(4-methoxy-2-(3-(phenylsulfonyl)prop-1-en-1-yl)phenyl)ethan-1-one (3a):** Pale yellow liquid; yield 72% (71 mg); Eluent- 30-35% ethyl acetate in hexane;  $^1\text{H}$  NMR (400 MHz, Chloroform-*d*)  $\delta$  7.89 (dd,  $J$  = 8.3, 1.3 Hz, 2H), 7.70 (d,  $J$  = 8.6 Hz, 1H), 7.66 – 7.59 (m, 1H), 7.54 (dd,  $J$  = 8.3, 7.0 Hz, 2H), 7.08 (d,  $J$  = 15.7 Hz, 1H), 6.90 (d,  $J$  = 2.6 Hz, 1H), 6.84 (dd,  $J$  = 8.7, 2.7 Hz, 1H), 5.99 – 5.89 (m, 1H), 4.00 (d,  $J$  = 7.6 Hz, 2H), 3.87 (s, 3H), 2.47 (s, 3H) ppm;  $^{13}\text{C}$  NMR (101 MHz,  $\text{CDCl}_3$ )  $\delta$  199.2, 162.4, 139.3, 139.2, 138.6, 133.9 (2C), 132.4, 129.2, 128.5, 117.6, 113.7, 113.1, 60.6, 55.6, 29.0 ppm; HRMS (ESI/TOF-Q)  $m/z$ :  $[\text{M} + \text{Na}]^+$  Calcd. For  $\text{C}_{18}\text{H}_{18}\text{O}_4\text{SNa}$  353.0823; Found 353.0829.

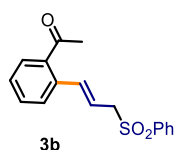

**(E)-1-(2-(3-(phenylsulfonyl)prop-1-en-1-yl)phenyl)ethan-1-one (3b):** Pale yellow liquid; yield 75% (68 mg); Eluent- 25-30% ethyl acetate in hexane;  $^1\text{H}$  NMR (400 MHz, Chloroform-*d*)  $\delta$  7.93 – 7.84 (m, 2H), 7.68 – 7.57 (m, 2H), 7.58 – 7.50 (m, 2H), 7.49 – 7.43 (m, 2H), 7.41 – 7.31 (m, 1H), 6.94 (d,  $J$  = 15.7 Hz, 1H), 6.05 – 5.88 (m, 1H), 3.99 (d,  $J$  = 7.6 Hz, 2H), 2.49 (s, 3H) ppm;  $^{13}\text{C}$  NMR (101 MHz,  $\text{CDCl}_3$ )  $\delta$  201.3, 138.5, 138.3, 136.9, 135.9, 133.9, 132.0, 129.3, 129.2, 128.4, 128.2, 128.1, 117.8, 60.5, 29.5 ppm; HRMS (ESI/TOF-Q)  $m/z$ :  $[\text{M} + \text{Na}]^+$  Calcd. For  $\text{C}_{17}\text{H}_{16}\text{O}_3\text{SNa}$  323.0718; Found 323.0725.

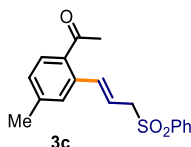

**(E)-1-(4-methyl-2-(3-(phenylsulfonyl)prop-1-en-1-yl)phenyl)ethan-1-one (3c):** Pale yellow liquid; yield 68% (64 mg); Eluent- 25-30% ethyl acetate in hexane;  $^1\text{H}$  NMR (400 MHz, Chloroform-*d*)  $\delta$  7.94 – 7.87 (m, 2H), 7.68 – 7.50 (m, 4H), 7.27 (s, 1H), 7.17 (d,  $J$  = 7.8 Hz, 1H), 7.00 (d,  $J$  = 15.7 Hz, 1H), 6.06 – 5.93 (m, 1H), 4.01 (d,  $J$  = 7.6 Hz, 2H), 2.49 (s, 3H), 2.40 (s, 3H) ppm;  $^{13}\text{C}$  NMR (101 MHz,  $\text{CDCl}_3$ )  $\delta$  200.7, 142.8, 138.8, 138.6, 136.4, 134.0, 133.9, 129.8, 129.2, 128.9 (2C), 128.5, 117.3, 60.6, 29.3, 21.6 ppm; HRMS (ESI/TOF-Q)  $m/z$ :  $[\text{M} + \text{Na}]^+$  Calcd. For  $\text{C}_{18}\text{H}_{18}\text{O}_3\text{SNa}$  337.0874; Found 337.0882.

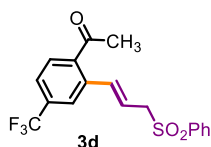

**(E)-1-(2-(3-(phenylsulfonyl)prop-1-en-1-yl)-4-(trifluoromethyl)phenyl)ethan-1-one (3d):** Pale yellow liquid; yield 63% (70 mg); Eluent- 25-30% ethyl acetate in hexane;  $^1\text{H}$  NMR (400 MHz, Chloroform-*d*)  $\delta$  7.89 (d,  $J$  = 8.0 Hz, 2H), 7.72 (d,  $J$  = 8.1 Hz, 1H), 7.67 – 7.53 (m, 5H), 6.93 (d,  $J$  = 15.8 Hz, 1H), 6.14 – 5.96 (m, 1H), 4.00 (d,  $J$  = 7.6 Hz, 2H), 2.51 (s, 3H) ppm;  $^{13}\text{C}$  NMR (101 MHz,  $\text{CDCl}_3$ )  $\delta$  200.7, 140.0, 138.6, 136.7, 136.4, 134.1, 133.4 (q,  $J$  = 33.3 Hz, 1C), 129.4, 129.3, 128.5, 125.0 – 124.8 (m, 2C), 124.8 (q,  $J$  = 273.7 Hz, 1C), 119.9, 60.4, 29.8 ppm; HRMS (ESI/TOF-Q)  $m/z$ :  $[\text{M} + \text{H}]^+$  Calcd. For  $\text{C}_{18}\text{H}_{16}\text{O}_3\text{F}_3\text{S}$  369.0772; Found 369.0748.

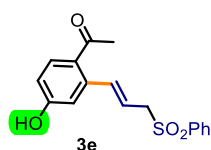

**(E)-1-(4-hydroxy-2-(3-(phenylsulfonyl)prop-1-en-1-yl)phenyl)ethan-1-one (3e):** Pale yellow liquid; yield 71% (67 mg); Eluent- 35-40% ethyl acetate in hexane;  $^1\text{H}$  NMR (400 MHz,  $\text{DMSO}-d_6$ )  $\delta$  10.42 (s, 1H), 7.88 (d,  $J$  = 7.7 Hz, 2H), 7.77 – 7.68 (m, 2H), 7.69 – 7.58 (m, 2H), 7.01 (d,  $J$  = 15.6 Hz, 1H), 6.85 – 6.73 (m, 2H), 5.88 – 5.74 (m, 1H), 4.27 (d,  $J$  = 7.5 Hz, 2H), 2.39 (s, 3H) ppm;  $^{13}\text{C}$  NMR (101 MHz,  $\text{DMSO}$ )  $\delta$  199.1, 160.7, 138.7, 138.1 (2C), 134.0, 133.0, 129.4, 128.1, 127.9, 118.0, 115.0, 114.1, 59.0, 29.2 ppm; HRMS (ESI/TOF-Q)  $m/z$ :  $[\text{M} + \text{Na}]^+$  Calcd. For  $\text{C}_{17}\text{H}_{16}\text{O}_4\text{SNa}$  339.0667; Found 339.0647.

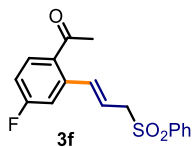

**(E)-1-(4-fluoro-2-(3-(phenylsulfonyl)prop-1-en-1-yl)phenyl)ethan-1-one (3f):** Pale yellow liquid; yield 70% (67 mg); Eluent- 25-30% ethyl acetate in hexane;  $^1\text{H}$  NMR (400 MHz, Chloroform-*d*)  $\delta$  7.92 – 7.85 (m, 2H), 7.73 – 7.59 (m, 2H), 7.58 – 7.50 (m, 2H), 7.15 – 7.07 (m, 1H), 7.07 – 6.95 (m, 2H), 6.04 – 5.92 (m, 1H), 3.99 (d,  $J$  = 7.6 Hz, 2H), 2.49 (s, 3H) ppm;  $^{13}\text{C}$  NMR (101 MHz,  $\text{CDCl}_3$ )  $\delta$  199.6, 164.5 (d,  $J$  = 253.9 Hz), 139.5 (d,  $J$  = 8.8 Hz), 138.6, 137.5, 134.0, 133.0 (d,  $J$  = 3.2 Hz), 132.1 (d,  $J$  = 9.4 Hz), 129.3, 128.4, 119.1, 115.1 (d,  $J$  = 9.5 Hz), 114.9 (d,  $J$  = 10.1 Hz), 60.4, 29.4 ppm; HRMS (ESI/TOF-Q)  $m/z$ :  $[\text{M} + \text{Na}]^+$  Calcd. For  $\text{C}_{17}\text{H}_{15}\text{FO}_3\text{SNa}$  341.0624; Found 341.0630.

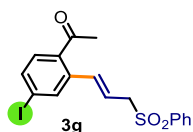

**(E)-1-(4-iodo-2-(3-(phenylsulfonyl)prop-1-en-1-yl)phenyl)ethan-1-one (3g):** Pale yellow liquid; yield 60% (77 mg); Eluent- 30-35% ethyl acetate in hexane;  $^1\text{H}$  NMR (400 MHz, Chloroform-*d*)  $\delta$  7.92 – 7.85 (m, 2H), 7.77 (s, 1H), 7.73 – 7.61 (m, 2H), 7.59 – 7.50 (m, 2H), 7.36 (d,  $J$  = 8.2 Hz, 1H), 6.88 (d,  $J$  = 15.7 Hz, 1H), 6.03 – 5.88 (m, 1H), 3.97 (d,  $J$  = 7.6 Hz, 2H), 2.46 (s, 3H) ppm;  $^{13}\text{C}$  NMR (101 MHz,  $\text{CDCl}_3$ )  $\delta$  200.4, 138.6, 137.7, 137.2, 137.1, 137.0, 135.9, 134.0, 130.5, 129.3, 128.4, 119.1, 99.3, 60.4, 29.4 ppm; HRMS (ESI/TOF-Q)  $m/z$ :  $[\text{M} + \text{Na}]^+$  Calcd. For  $\text{C}_{17}\text{H}_{15}\text{IO}_3\text{SNa}$  448.9684; Found 448.9662.

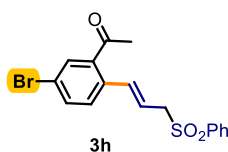

**(E)-1-(5-bromo-2-(3-(phenylsulfonyl)prop-1-en-1-yl)phenyl)ethan-1-one (3h):** Pale yellow liquid; yield 61% (69 mg); Eluent- 30-35% ethyl acetate in hexane;  $^1\text{H}$  NMR (400 MHz, Chloroform-*d*)  $\delta$  7.89 – 7.84 (m, 2H), 7.74 – 7.71 (m, 1H), 7.65 – 7.59 (m, 1H), 7.59 – 7.47 (m, 3H), 7.31 (d,  $J$  = 8.2 Hz, 1H), 6.84 (d,  $J$  = 15.7 Hz, 1H), 6.06 – 5.91 (m, 1H), 3.96 (d,  $J$  = 7.6 Hz, 2H), 2.46 (s, 3H) ppm;  $^{13}\text{C}$  NMR (101 MHz,  $\text{CDCl}_3$ )  $\delta$  199.9, 138.6, 138.4, 137.0, 134.8, 134.6, 133.9, 131.9, 129.5, 129.3, 128.4, 122.0, 118.6, 60.4, 29.5 ppm; HRMS (ESI/TOF-Q)  $m/z$ :  $[\text{M} + \text{Na}]^+$  Calcd. For  $\text{C}_{17}\text{H}_{15}\text{BrO}_3\text{SNa}$  400.9823; Found 400.9831.

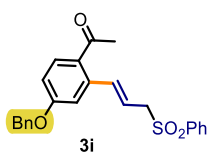

**(E)-1-(4-(benzyloxy)-2-(3-(phenylsulfonyl)prop-1-en-1-yl)phenyl)ethan-1-one (3i):** Pale yellow liquid; yield 67% (82 mg); Eluent- 25-30% ethyl acetate in hexane;  $^1\text{H}$  NMR (400 MHz, Chloroform-*d*)  $\delta$  7.87 (d,  $J$  = 7.5 Hz, 2H), 7.69 (d,  $J$  = 8.6 Hz, 1H), 7.63 – 7.57 (m, 1H), 7.54 – 7.46 (m, 2H), 7.46 – 7.31 (m, 5H), 7.07 (d,  $J$  = 15.7 Hz, 1H), 7.00 (s, 1H), 6.91 (d,  $J$  = 8.6 Hz, 1H), 6.01 – 5.88 (m, 1H), 5.13 (s, 2H), 3.99 (d,  $J$  = 7.4 Hz, 2H), 2.45 (s, 3H) ppm;  $^{13}\text{C}$  NMR (101 MHz,  $\text{CDCl}_3$ )  $\delta$  199.1, 161.4, 139.2, 139.0, 138.5, 136.1, 133.8, 132.3, 129.3, 129.1, 128.8, 128.4 (2C), 127.5, 117.7, 114.5, 113.9, 70.2, 60.4, 28.9 ppm; HRMS (ESI/TOF-Q)  $m/z$ :  $[\text{M} + \text{Na}]^+$  Calcd. For  $\text{C}_{24}\text{H}_{22}\text{O}_4\text{SNa}$  429.1136; Found 429.1142.

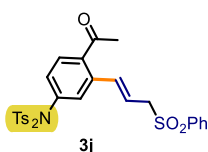

**(E)-N-(4-acetyl-3-(3-(phenylsulfonyl)prop-1-en-1-yl)phenyl)-4-methyl-N-tosylbenzenesulfonamide (3j):** Pale yellow liquid; yield 37% (69 mg); Eluent- 40-45% ethyl acetate in hexane;  $^1\text{H}$  NMR (400 MHz, Chloroform-*d*)  $\delta$  7.86 – 7.81 (m, 4H), 7.77 (d,  $J$  = 7.4 Hz, 2H), 7.69 – 7.59 (m, 2H), 7.56 – 7.49 (m, 2H), 7.43 – 7.36 (m, 4H), 7.10 (d,  $J$  = 8.1 Hz, 1H), 6.91 – 6.80 (m, 2H), 5.67 – 5.53 (m, 1H), 3.92 (d,  $J$  = 7.3 Hz, 2H), 2.51 (s, 9H) ppm;  $^{13}\text{C}$  NMR (101 MHz,  $\text{CDCl}_3$ )  $\delta$  200.3, 145.9, 138.4, 137.7, 137.5, 137.4, 137.0, 136.3, 134.1, 131.5, 131.0, 130.1, 130.0, 129.4, 128.7, 128.4, 119.7, 60.5, 29.6, 21.9 ppm; HRMS (ESI/TOF-Q)  $m/z$ :  $[\text{M} + \text{Na}]^+$  Calcd. For  $\text{C}_{31}\text{H}_{29}\text{NO}_7\text{S}_3\text{Na}$  646.1004; Found 646.0994.

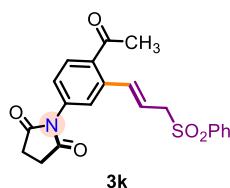

**(E)-1-(4-acetyl-3-(3-(phenylsulfonyl)prop-1-en-1-yl)phenyl)pyrrolidine-2,5-dione (3k):** Pale yellow liquid; yield 49% (58 mg); Eluent- 35-40% ethyl acetate in hexane;  $^1\text{H NMR}$  (400 MHz, Chloroform-*d*)  $\delta$  7.88 (d,  $J$  = 7.9 Hz, 2H), 7.75 (d,  $J$  = 8.2 Hz, 1H), 7.63 (t,  $J$  = 7.4 Hz, 1H), 7.58 – 7.51 (m, 2H), 7.45 (s, 1H), 7.34 (d,  $J$  = 8.2 Hz, 1H), 6.92 (d,  $J$  = 15.7 Hz, 1H), 6.08 – 5.95 (m, 1H), 3.98 (d,  $J$  = 7.6 Hz, 2H), 2.94 (s, 4H), 2.49 (s, 3H) ppm;  $^{13}\text{C NMR}$  (101 MHz,  $\text{CDCl}_3$ )  $\delta$  200.3, 175.8, 138.4, 137.4, 137.3, 136.3, 135.0, 134.0, 130.1, 129.3, 128.5, 126.1, 125.8, 119.2, 60.5, 29.6, 28.6 ppm; HRMS (ESI/TOF-Q)  $m/z$ :  $[\text{M} + \text{H}]^+$  Calcd. For  $\text{C}_{21}\text{H}_{20}\text{O}_5\text{S}$  398.1062; Found 398.1065.

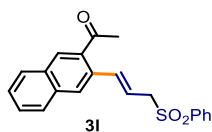

**(E)-1-(3-(3-(phenylsulfonyl)prop-1-en-1-yl)naphthalen-2-yl)ethan-1-one (3l):** Pale yellow solid; yield 57% (60 mg); Eluent- 30-35% ethyl acetate in hexane;  $^1\text{H NMR}$  (400 MHz, Chloroform-*d*)  $\delta$  8.20 (s, 1H), 7.94 (d,  $J$  = 8.0 Hz, 2H), 7.91 – 7.81 (m, 3H), 7.66 – 7.48 (m, 5H), 7.08 (d,  $J$  = 15.5 Hz, 1H), 6.15 – 6.00 (m, 1H), 4.04 (d,  $J$  = 7.5 Hz, 2H), 2.63 (s, 3H) ppm;  $^{13}\text{C NMR}$  (101 MHz,  $\text{CDCl}_3$ )  $\delta$  200.8, 139.0, 138.7, 134.8, 134.7, 133.9, 133.1, 132.1, 130.9, 129.2, 128.9, 128.8, 128.5, 128.0, 127.7, 127.3, 117.0, 60.6, 29.3 ppm; HRMS (ESI/TOF-Q)  $m/z$ :  $[\text{M} + \text{Na}]^+$  Calcd. For  $\text{C}_{21}\text{H}_{18}\text{O}_3\text{SNa}$  373.0874; Found 373.0882.

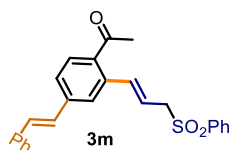

**1-(2-((E)-3-(phenylsulfonyl)prop-1-en-1-yl)-4-((E)-styryl)phenyl)ethan-1-one (3m):** Pale yellow liquid; yield 69% (83 mg); Eluent- 30-35% ethyl acetate in hexane;  $^1\text{H NMR}$  (400 MHz, Chloroform-*d*)  $\delta$  7.93 (d,  $J$  = 7.7 Hz, 2H), 7.71 – 7.61 (m, 2H), 7.59 – 7.51 (m, 5H), 7.49 (d,  $J$  = 8.1 Hz, 1H), 7.43 – 7.36 (m, 2H), 7.32 (dd,  $J$  = 8.2, 6.4 Hz, 1H), 7.23 (s, 1H), 7.13 – 7.01 (m, 2H), 6.13 – 5.99 (m, 1H), 4.03 (d,  $J$  = 7.5 Hz, 2H), 2.50 (s, 3H) ppm;  $^{13}\text{C NMR}$  (101 MHz,  $\text{CDCl}_3$ )  $\delta$  200.3, 141.1, 138.8, 138.7, 136.9, 136.6, 135.1, 133.9, 131.7, 130.2, 129.2, 128.9, 128.5 (2C), 127.0, 126.9, 126.3, 125.8, 117.8, 60.6, 29.3 ppm; HRMS (ESI/TOF-Q)  $m/z$ :  $[\text{M} + \text{Na}]^+$  Calcd. For  $\text{C}_{25}\text{H}_{22}\text{O}_3\text{SNa}$  425.1187; Found 425.1190.

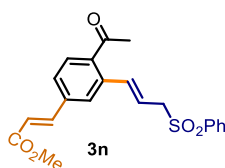

**Methyl (E)-3-(4-acetyl-3-((E)-3-(phenylsulfonyl)prop-1-en-1-yl)phenyl)acrylate (3n):** Pale yellow liquid; yield 62% (71 mg); Eluent- 35-40% ethyl acetate in hexane;  $^1\text{H NMR}$  (400 MHz, Chloroform-*d*)  $\delta$  7.94 – 7.84 (m, 2H), 7.71 – 7.60 (m, 3H), 7.58 – 7.44 (m, 4H), 6.97 (d,  $J$  = 15.7 Hz, 1H), 6.55 – 6.42 (m, 1H), 6.04 – 5.90 (m, 1H), 3.99 (d,  $J$  = 7.5 Hz, 2H), 3.81 (s, 3H), 2.48 (s, 3H) ppm;  $^{13}\text{C NMR}$  (101 MHz,  $\text{CDCl}_3$ )  $\delta$  200.4, 166.9, 142.9, 138.6, 137.8, 137.7, 136.7, 133.9, 129.9, 129.3, 128.4 (2C), 127.7, 127.3, 120.6, 118.6, 60.4, 52.0, 29.5 ppm; HRMS (ESI/TOF-Q)  $m/z$ :  $[\text{M} + \text{Na}]^+$  Calcd. For  $\text{C}_{21}\text{H}_{20}\text{O}_5\text{SNa}$  407.0929; Found 407.0931.

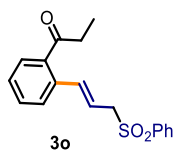

**(E)-1-(2-(3-(phenylsulfonyl)prop-1-en-1-yl)phenyl)propan-1-one (3o):** Pale yellow liquid; yield 53% (50 mg); Eluent- 25-30% ethyl acetate in hexane;  $^1\text{H NMR}$  (400 MHz, Chloroform-*d*)  $\delta$  7.91 – 7.86 (m, 2H), 7.65 – 7.57 (m, 2H), 7.56 – 7.50 (m, 2H), 7.48 – 7.41 (m, 2H), 7.38 – 7.31 (m, 1H), 6.91 – 6.81 (m, 1H), 6.07 – 5.92 (m, 1H), 3.99 (d,  $J$  = 7.5 Hz, 2H), 2.83 (q,  $J$  = 7.2 Hz, 2H), 1.11 (t,  $J$  = 7.2 Hz, 3H) ppm;  $^{13}\text{C NMR}$  (101 MHz,  $\text{CDCl}_3$ )  $\delta$  204.7, 138.6, 138.2, 137.3, 135.6, 133.9, 131.6, 129.2, 128.5, 128.4, 128.3, 127.9, 117.7, 60.6, 34.8, 8.4 ppm; HRMS (ESI/TOF-Q)  $m/z$ :  $[\text{M} + \text{Na}]^+$  Calcd. For  $\text{C}_{18}\text{H}_{18}\text{O}_3\text{SNa}$  337.0874; Found 337.0855.

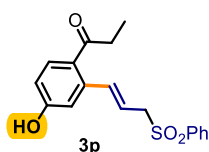

**(E)-1-(4-hydroxy-2-(3-(phenylsulfonyl)prop-1-en-1-yl)phenyl)propan-1-one**

**(3p):** Pale yellow liquid; yield 62% (61 mg); Eluent- 35-40% ethyl acetate in hexane;  $^1\text{H NMR}$  (400 MHz, Chloroform-*d*)  $\delta$  7.92 – 7.87 (m, 2H), 7.65 – 7.58 (m, 2H), 7.56 – 7.50 (m, 2H), 7.06 – 6.99 (m, 1H), 6.96 (s, 1H), 6.88 – 6.76 (m, 1H), 5.99 – 5.86 (m, 1H), 3.99 (d,  $J$  = 7.5 Hz, 2H), 2.83 (q,  $J$  = 7.3 Hz, 2H), 1.10 (t,  $J$  = 7.3 Hz, 3H) ppm;  $^{13}\text{C NMR}$  (101 MHz,  $\text{CDCl}_3$ )  $\delta$  203.0, 159.6, 139.6, 139.3, 138.2, 134.1, 131.8, 129.4, 128.6, 128.4, 116.8, 115.3, 115.1, 60.6, 33.8, 8.7 ppm; HRMS (ESI/TOF-Q)  $m/z$ :  $[\text{M} + \text{Na}]^+$  Calcd. For  $\text{C}_{18}\text{H}_{18}\text{O}_4\text{SNa}$  353.0823; Found 353.0805.

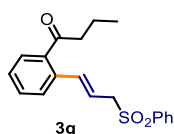

**(E)-1-(2-(3-(phenylsulfonyl)prop-1-en-1-yl)phenyl)butan-1-one (3q):** Pale yellow liquid; yield 51% (50 mg); Eluent- 25-30% ethyl acetate in hexane;  $^1\text{H NMR}$  (400 MHz, Chloroform-*d*)  $\delta$  7.89 (d,  $J$  = 7.8 Hz, 2H), 7.65 – 7.57 (m, 2H), 7.57 – 7.50 (m, 2H), 7.49 – 7.41 (m, 2H), 7.38 – 7.31 (m, 1H), 6.86 (d,  $J$  = 15.7 Hz, 1H), 6.06 – 5.93 (m, 1H), 3.98 (d,  $J$  = 7.6 Hz, 2H), 2.78 (t,  $J$  = 7.3 Hz, 2H), 1.71 – 1.59 (m, 2H), 0.93 (t,  $J$  = 7.4 Hz, 3H) ppm;  $^{13}\text{C NMR}$  (101 MHz,  $\text{CDCl}_3$ )  $\delta$  204.4, 138.7, 138.1, 137.6, 135.6, 133.9, 131.6, 129.2, 128.5, 128.4, 128.2, 127.9, 117.7, 60.6, 43.6, 17.9, 13.9 ppm; HRMS (ESI/TOF-Q)  $m/z$ :  $[\text{M} + \text{Na}]^+$  Calcd. For  $\text{C}_{19}\text{H}_{20}\text{O}_3\text{SNa}$  351.1031; Found 351.1031.

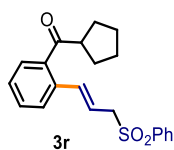

**(E)-cyclopentyl(2-(3-(phenylsulfonyl)prop-1-en-1-yl)phenyl)methanone (3r):**

Pale yellow liquid; yield 46% (49 mg); Eluent- 20-25% ethyl acetate in hexane;  $^1\text{H NMR}$  (400 MHz, Chloroform-*d*)  $\delta$  7.94 – 7.84 (m, 2H), 7.66 – 7.40 (m, 6H), 7.37 – 7.32 (m, 1H), 6.78 (d,  $J$  = 15.7 Hz, 1H), 6.07 – 5.97 (m, 1H), 3.98 (d,  $J$  = 7.6 Hz, 2H), 3.55 – 3.37 (m, 1H), 1.82 – 1.72 (m, 4H), 1.68 – 1.56 (m, 4H) ppm;  $^{13}\text{C NMR}$  (101 MHz,  $\text{CDCl}_3$ )  $\delta$  207.1, 138.7, 138.2, 137.9, 135.6, 133.9, 131.3, 129.2, 128.5, 128.3, 128.2, 127.7, 117.6, 60.6, 49.6, 29.9, 26.3 ppm; HRMS (ESI/TOF-Q)  $m/z$ :  $[\text{M} + \text{Na}]^+$  Calcd. For  $\text{C}_{21}\text{H}_{22}\text{O}_3\text{SNa}$  377.1187; Found 377.1190.

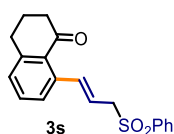

**(E)-8-(3-(phenylsulfonyl)prop-1-en-1-yl)-3,4-dihydronaphthalen-1(2H)-one (3s):**

Pale yellow liquid; yield 84% (82 mg); Eluent- 25-30% ethyl acetate in hexane;  $^1\text{H NMR}$  (400 MHz, Chloroform-*d*)  $\delta$  7.91 (d,  $J$  = 7.7 Hz, 2H), 7.65 – 7.58 (m, 1H), 7.57 – 7.49 (m, 2H), 7.43 – 7.34 (m, 1H), 7.33 – 7.15 (m, 3H), 5.95 – 5.82 (m, 1H), 4.03 (d,  $J$  = 7.5 Hz, 2H), 2.93 (t,  $J$  = 6.1 Hz, 2H), 2.59 (t,  $J$  = 6.6 Hz, 2H), 2.11 – 1.99 (m, 2H) ppm;  $^{13}\text{C NMR}$  (101 MHz,  $\text{CDCl}_3$ )  $\delta$  199.7, 145.6, 140.4, 138.6 (2C), 133.8, 132.7, 130.1, 129.1 (2C), 128.4, 127.0, 116.8, 60.6, 40.6, 30.6, 22.8 ppm; HRMS (ESI/TOF-Q)  $m/z$ :  $[\text{M} + \text{Na}]^+$  Calcd. For  $\text{C}_{19}\text{H}_{18}\text{O}_3\text{SNa}$  349.0874; Found 349.0862.

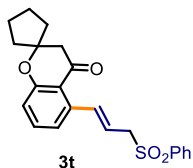

**(E)-5-(3-(phenylsulfonyl)prop-1-en-1-yl)spiro[chromane-2,1'-cyclopentan]-4-one**

**(3t):** Pale yellow liquid; yield 65% (74 mg); Eluent- 30-35% ethyl acetate in hexane;  $^1\text{H NMR}$  (400 MHz, Chloroform-*d*)  $\delta$  7.91 (d,  $J$  = 7.8 Hz, 2H), 7.69 – 7.49 (m, 3H), 7.44 – 7.33 (m, 2H), 6.98 – 6.85 (m, 2H), 6.03 – 5.90 (m, 1H), 4.03 (d,  $J$  = 7.6 Hz, 2H), 2.75 (s, 2H), 2.14 – 1.95 (m, 2H), 1.91 – 1.79 (m, 2H), 1.76 – 1.55 (m, 4H) ppm;  $^{13}\text{C NMR}$  (101 MHz,  $\text{CDCl}_3$ )  $\delta$  193.9, 161.1, 139.3, 138.6, 135.0, 133.8, 129.2 (2C), 128.5 (2C), 120.5, 118.9, 117.9, 89.4, 60.6, 48.3, 37.3, 23.9 ppm; HRMS (ESI/TOF-Q)  $m/z$ :  $[\text{M} + \text{Na}]^+$  Calcd. For  $\text{C}_{22}\text{H}_{22}\text{O}_4\text{SNa}$  405.1136; Found 405.1144.

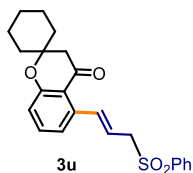

**(E)-5-(3-(phenylsulfonyl)prop-1-en-1-yl)spiro[chromane-2,1'-cyclohexan]-4-one (3u):** Pale yellow liquid; yield 70% (83 mg); Eluent- 30-35% ethyl acetate in hexane;  $^1\text{H NMR}$  (400 MHz, Chloroform-*d*)  $\delta$  7.93 – 7.84 (m, 2H), 7.67 – 7.58 (m, 1H), 7.57 – 7.48 (m, 2H), 7.41 – 7.30 (m, 2H), 6.97 – 6.85 (m, 2H), 5.99 – 5.86 (m, 1H), 4.00 (d,  $J$  = 7.5 Hz, 2H), 2.61 (s, 2H), 1.97 – 1.82 (m, 2H), 1.74 – 1.55 (m, 3H), 1.53 – 1.39 (m, 4H), 1.37 – 1.21 (m, 1H) ppm;  $^{13}\text{C NMR}$  (101 MHz,  $\text{CDCl}_3$ )  $\delta$  193.8, 160.4, 139.2, 138.6, 138.4, 135.1, 133.8, 129.1, 128.5, 120.4, 118.8, 117.9, 117.7, 79.4, 60.6, 49.3, 34.6, 25.2, 21.5 ppm; HRMS (ESI/TOF-Q)  $m/z$ :  $[\text{M} + \text{Na}]^+$  Calcd. For  $\text{C}_{23}\text{H}_{24}\text{O}_4\text{SNa}$  419.1293; Found 419.1294.

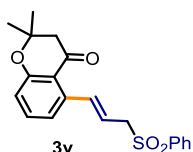

**(E)-2,2-dimethyl-5-(3-(phenylsulfonyl)prop-1-en-1-yl)chroman-4-one (3v):** Pale yellow liquid; yield 68% (73 mg); Eluent- 30-35% ethyl acetate in hexane;  $^1\text{H NMR}$  (400 MHz, Chloroform-*d*)  $\delta$  7.93 – 7.84 (m, 2H), 7.64 – 7.56 (m, 1H), 7.56 – 7.49 (m, 2H), 7.40 – 7.31 (m, 2H), 6.96 – 6.84 (m, 2H), 6.02 – 5.83 (m, 1H), 4.00 (d,  $J$  = 7.7 Hz, 2H), 2.63 (s, 2H), 1.39 (s, 6H) ppm;  $^{13}\text{C NMR}$  (101 MHz,  $\text{CDCl}_3$ )  $\delta$  193.7, 160.7, 139.2, 138.6, 138.4, 135.1, 133.8, 129.1, 128.5, 120.4, 118.7, 117.9, 117.1, 78.6, 60.6, 50.1, 26.5 ppm; HRMS (ESI/TOF-Q)  $m/z$ :  $[\text{M} + \text{Na}]^+$  Calcd. For  $\text{C}_{20}\text{H}_{20}\text{O}_4\text{SNa}$  379.0980; Found 379.0985.

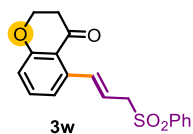

**(E)-5-(3-(phenylsulfonyl)prop-1-en-1-yl)chroman-4-one (3w):** Pale yellow liquid; yield 71% (70 mg); Eluent- 30-40% ethyl acetate in hexane;  $^1\text{H NMR}$  (400 MHz, Chloroform-*d*)  $\delta$  7.90 (d,  $J$  = 7.8 Hz, 2H), 7.67 – 7.57 (m, 1H), 7.57 – 7.48 (m, 2H), 7.42 – 7.32 (m, 2H), 7.00 – 6.88 (m, 2H), 6.01 – 5.86 (m, 1H), 4.45 (t,  $J$  = 6.5 Hz, 2H), 4.02 (d,  $J$  = 7.7 Hz, 2H), 2.73 (t,  $J$  = 6.5 Hz, 2H) ppm;  $^{13}\text{C NMR}$  (101 MHz,  $\text{CDCl}_3$ )  $\delta$  193.0, 162.7, 139.3, 139.2, 138.6, 135.1, 133.8, 129.2, 128.5, 121.2, 118.4, 118.3, 118.0, 66.5, 60.6, 39.0 ppm; HRMS (ESI/TOF-Q)  $m/z$ :  $[\text{M} + \text{Na}]^+$  Calcd. For  $\text{C}_{18}\text{H}_{16}\text{O}_4\text{SNa}$  351.0667; Found 351.0674.

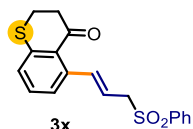

**(E)-5-(3-(phenylsulfonyl)prop-1-en-1-yl)thiochroman-4-one (3x):** Pale yellow liquid; yield 38% (39 mg); Eluent- 35-40% ethyl acetate in hexane;  $^1\text{H NMR}$  (400 MHz, Chloroform-*d*)  $\delta$  7.97 – 7.86 (m, 2H), 7.69 – 7.61 (m, 1H), 7.61 – 7.51 (m, 2H), 7.35 – 7.21 (m, 2H), 7.13 – 7.03 (m, 2H), 5.94 – 5.78 (m, 1H), 4.02 (d,  $J$  = 7.5 Hz, 2H), 3.23 – 3.11 (m, 2H), 3.02 – 2.88 (m, 2H) ppm;  $^{13}\text{C NMR}$  (101 MHz,  $\text{CDCl}_3$ )  $\delta$  195.9, 143.4, 140.5, 140.4, 138.8, 133.9, 132.4, 129.2, 129.0, 128.5, 128.0, 126.0, 117.0, 60.6, 41.2, 26.3 ppm; HRMS (ESI/TOF-Q)  $m/z$ :  $[\text{M} + \text{Na}]^+$  Calcd. For  $\text{C}_{18}\text{H}_{16}\text{O}_3\text{S}_2\text{Na}$  367.0439; Found 367.0437.

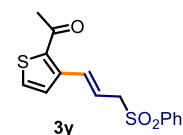

**(E)-1-(3-(3-(phenylsulfonyl)prop-1-en-1-yl)thiophen-2-yl)ethan-1-one (3y):** Pale yellow liquid; yield 73% (67 mg); Eluent- 30-35% ethyl acetate in hexane;  $^1\text{H NMR}$  (400 MHz, Chloroform-*d*)  $\delta$  7.82 – 7.78 (m, 2H), 7.60 – 7.53 (m, 1H), 7.49 – 7.44 (m, 2H), 7.36 – 7.32 (m, 1H), 7.24 – 7.18 (m, 2H), 6.18 – 6.03 (m, 1H), 3.93 (d,  $J$  = 7.7 Hz, 2H), 2.39 (s, 3H) ppm;  $^{13}\text{C NMR}$  (101 MHz,  $\text{CDCl}_3$ )  $\delta$  191.1, 142.3, 138.5, 136.2, 133.9, 132.8, 130.1, 129.2, 128.4, 127.5, 120.2, 60.7, 30.0 ppm; HRMS (ESI/TOF-Q)  $m/z$ :  $[\text{M} + \text{Na}]^+$  Calcd. For  $\text{C}_{15}\text{H}_{14}\text{O}_3\text{S}_2\text{Na}$  329.0282; Found 329.0287.



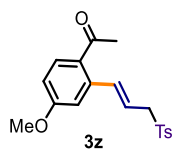

**(E)-1-(4-methoxy-2-(3-tosylprop-1-en-1-yl)phenyl)ethan-1-one (3z):** Pale yellow liquid; yield 67% (69 mg); Eluent- 30-35% ethyl acetate in hexane;  $^1\text{H NMR}$  (400 MHz, Chloroform-*d*)  $\delta$  7.79 – 7.73 (m, 2H), 7.72 – 7.67 (m, 1H), 7.32 (d,  $J$  = 7.8 Hz, 2H), 7.09 (d,  $J$  = 15.6 Hz, 1H), 6.92 – 6.88 (m, 1H), 6.87 – 6.80 (m, 1H), 6.03 – 5.85 (m, 1H), 3.98 (d,  $J$  = 7.0 Hz, 2H), 3.87 (s, 3H), 2.47 (s, 3H), 2.41 (s, 3H) ppm;  $^{13}\text{C NMR}$  (101 MHz,  $\text{CDCl}_3$ )  $\delta$  199.2, 162.4, 144.8, 139.4, 139.0, 135.8, 132.3, 129.8, 129.3, 128.5, 117.9, 113.7, 113.1, 60.6, 55.6, 29.0, 21.7 ppm; HRMS (ESI/TOF-Q)  $m/z$ :  $[\text{M} + \text{Na}]^+$  Calcd. For  $\text{C}_{19}\text{H}_{20}\text{O}_4\text{SNa}$  367.0980; Found 367.0982.

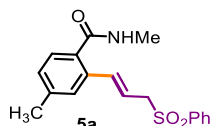

**(E)-N,4-dimethyl-2-(3-(phenylsulfonyl)prop-1-en-1-yl)benzamide (5a):** White solid; yield 73% (72 mg); Eluent- 60-65% ethyl acetate in hexane;  $^1\text{H NMR}$  (400 MHz, DMSO)  $\delta$  8.14 – 8.07 (m, 1H), 7.94 – 7.87 (m, 2H), 7.77 – 7.70 (m, 1H), 7.68 – 7.61 (m, 2H), 7.38 (s, 1H), 7.26 – 7.22 (m, 1H), 7.13 (d,  $J$  = 7.6 Hz, 1H), 6.85 – 6.77 (m, 1H), 6.12 – 6.01 (m, 1H), 4.27 (d,  $J$  = 7.5 Hz, 2H), 2.70 (d,  $J$  = 4.4 Hz, 3H), 2.33 (s, 3H) ppm;  $^{13}\text{C NMR}$  (101 MHz, DMSO)  $\delta$  168.8, 139.2, 138.7, 135.8, 133.8, 133.6, 133.6, 129.3, 128.5, 128.0, 127.5, 126.2, 117.4, 59.0, 26.1, 20.8 ppm; HRMS (ESI/TOF-Q)  $m/z$ :  $[\text{M} + \text{H}]^+$  Calcd. For  $\text{C}_{18}\text{H}_{20}\text{NO}_3\text{S}$  330.1164; Found 330.1151.

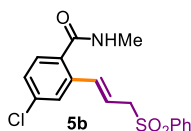

**(E)-4-chloro-N-methyl-2-(3-(phenylsulfonyl)prop-1-en-1-yl)benzamide (5b):** White solid; yield 39% (41 mg); Eluent- 60-65% ethyl acetate in hexane;  $^1\text{H NMR}$  (400 MHz, Chloroform-*d*)  $\delta$  7.90 (d,  $J$  = 7.5 Hz, 2H), 7.72 – 7.65 (m, 1H), 7.61 – 7.56 (m, 2H), 7.46 (d,  $J$  = 8.3 Hz, 1H), 7.41 (d,  $J$  = 2.0 Hz, 1H), 7.32 – 7.27 (m, 1H), 6.90 (d,  $J$  = 15.7 Hz, 1H), 6.13 – 5.93 (m, 2H), 3.97 (d,  $J$  = 7.6 Hz, 2H), 2.97 (d,  $J$  = 4.8 Hz, 3H) ppm;  $^{13}\text{C NMR}$  (101 MHz,  $\text{CDCl}_3$ )  $\delta$  168.4, 138.9, 136.7, 136.6, 136.1, 134.2, 133.6, 129.6, 129.5, 128.6, 128.4, 126.9, 119.3, 60.4, 27.2 ppm; HRMS (ESI/TOF-Q)  $m/z$ :  $[\text{M} + \text{H}]^+$  Calcd. For  $\text{C}_{17}\text{H}_{17}\text{ClNO}_3\text{S}$  350.0618; Found 350.0606.

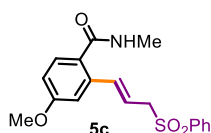

**(E)-4-methoxy-N-methyl-2-(3-(phenylsulfonyl)prop-1-en-1-yl)benzamide (5c):** White solid; yield 69% (71 mg); Eluent- 65-70% ethyl acetate in hexane;  $^1\text{H NMR}$  (400 MHz, Chloroform-*d*)  $\delta$  7.94 – 7.86 (m, 2H), 7.70 – 7.63 (m, 1H), 7.61 – 7.53 (m, 2H), 7.52 – 7.44 (m, 1H), 6.97 (d,  $J$  = 15.7 Hz, 1H), 6.91 (s, 1H), 6.87 – 6.81 (m, 1H), 6.08 – 5.89 (m, 2H), 3.97 (d,  $J$  = 7.6 Hz, 2H), 3.84 (s, 3H), 2.94 (d,  $J$  = 4.7 Hz, 3H) ppm;  $^{13}\text{C NMR}$  (101 MHz,  $\text{CDCl}_3$ )  $\delta$  169.1, 161.1, 138.9, 138.1, 136.3, 134.0, 130.0, 129.4, 128.4, 127.9, 118.0, 113.9, 112.2, 60.5, 55.6, 27.1 ppm; HRMS (ESI/TOF-Q)  $m/z$ :  $[\text{M} + \text{H}]^+$  Calcd. For  $\text{C}_{18}\text{H}_{20}\text{NO}_4\text{S}$  346.1113; Found 346.1102.

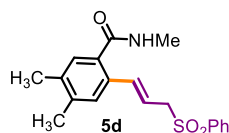

**(E)-N,4,5-trimethyl-2-(3-(phenylsulfonyl)prop-1-en-1-yl)benzamide (5d):** White solid; yield 52% (54 mg); Eluent- 60-65% ethyl acetate in hexane;  $^1\text{H NMR}$  (400 MHz, Chloroform-*d*)  $\delta$  7.93 – 7.85 (m, 2H), 7.68 – 7.61 (m, 1H), 7.59 – 7.50 (m, 2H), 7.27 (d,  $J$  = 1.7 Hz, 1H), 7.22 (s, 1H), 6.84 (s, 1H), 6.07 – 5.95 (m, 1H), 5.90 (s, 1H), 3.95 (d,  $J$  = 7.6 Hz, 2H), 2.93 (d,  $J$  = 4.8 Hz, 3H), 2.27 (s, 3H), 2.25 (s, 3H) ppm;  $^{13}\text{C NMR}$  (101 MHz,  $\text{CDCl}_3$ )  $\delta$  169.6, 139.3, 138.9, 137.8, 137.4, 134.0, 132.8, 131.8, 129.3, 129.2, 128.4, 127.9, 116.6, 60.6, 27.0, 19.8, 19.5 ppm; HRMS (ESI/TOF-Q)  $m/z$ :  $[\text{M} + \text{H}]^+$  Calcd. For  $\text{C}_{19}\text{H}_{22}\text{NO}_3\text{S}$  344.1320; Found 344.1313.

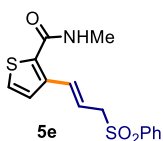

**(E)-N-methyl-3-(3-(phenylsulfonyl)prop-1-en-1-yl)thiophene-2-carboxamide (5e):** Pale yellow solid; yield 92% (89 mg); Eluent- 60-65% ethyl acetate in hexane;  $^1\text{H NMR}$  (400 MHz, Chloroform-*d*)  $\delta$  7.80 (d,  $J$  = 7.8 Hz, 2H), 7.61 – 7.54 (m, 1H), 7.52 – 7.43 (m, 2H), 7.20 (d,  $J$  = 5.3 Hz, 1H), 7.12 – 7.00 (m, 2H), 6.08 – 5.90 (m, 2H), 3.89 (d,  $J$  = 7.5 Hz, 2H), 2.84 (d,  $J$  = 4.8 Hz, 3H) ppm;  $^{13}\text{C NMR}$  (101 MHz,  $\text{CDCl}_3$ )  $\delta$  163.1, 139.6, 138.7, 134.0, 133.0, 132.7, 129.3, 128.4, 127.2, 126.8, 118.6, 60.5, 27.0 ppm; HRMS (ESI)  $m/z$ :  $[\text{M} + \text{Na}]^+$  Calcd. For  $\text{C}_{15}\text{H}_{15}\text{NO}_3\text{S}_2\text{Na}$  344.0386; Found 344.0390.

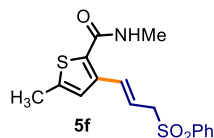

**(E)-N,5-dimethyl-3-(3-(phenylsulfonyl)prop-1-en-1-yl)thiophene-2-carboxamide (5f):** Pale yellow solid; yield 89% (89 mg); Eluent- 60-65% ethyl acetate in hexane;  $^1\text{H}$  NMR (400 MHz, Chloroform-*d*)  $\delta$  7.85 (d,  $J$  = 7.3 Hz, 2H), 7.67 – 7.59 (m, 1H), 7.58 – 7.50 (m, 2H), 7.10 (d,  $J$  = 15.8 Hz, 1H), 6.84 (s, 1H), 6.05 – 5.93 (m, 1H), 5.89 – 5.82 (m, 1H), 3.93 (d,  $J$  = 7.7 Hz, 2H), 2.87 (d,  $J$  = 4.4 Hz, 3H), 2.42 (s, 3H) ppm;  $^{13}\text{C}$  NMR (101 MHz,  $\text{CDCl}_3$ )  $\delta$  163.1, 141.9, 139.9, 138.7, 134.0, 132.8, 130.6, 129.3, 128.4, 125.2, 118.3, 60.6, 26.9, 15.5 ppm; HRMS (ESI/TOF-Q)  $m/z$ :  $[\text{M} + \text{Na}]^+$  Calcd. For  $\text{C}_{16}\text{H}_{17}\text{NO}_3\text{S}_2\text{Na}$  358.0548; Found 358.0547.

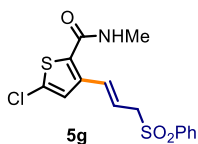

**(E)-5-chloro-N-methyl-3-(3-(phenylsulfonyl)prop-1-en-1-yl)thiophene-2-carboxamide (5g):** Pale yellow solid; yield 72% (77 mg); Eluent- 60-65% ethyl acetate in hexane;  $^1\text{H}$  NMR (400 MHz, Chloroform-*d*)  $\delta$  7.86 (d,  $J$  = 7.9 Hz, 2H), 7.69 – 7.63 (m, 1H), 7.61 – 7.52 (m, 2H), 7.02 (d,  $J$  = 15.9 Hz, 1H), 6.95 (s, 1H), 6.19 – 5.88 (m, 2H), 3.94 (d,  $J$  = 7.6 Hz, 2H), 2.90 (d,  $J$  = 4.9 Hz, 3H) ppm;  $^{13}\text{C}$  NMR (101 MHz,  $\text{CDCl}_3$ )  $\delta$  162.0, 138.7 (2C), 134.2, 133.0, 132.1, 131.9, 129.5, 128.4, 126.0, 119.8, 60.3, 27.1 ppm; HRMS (ESI/TOF-Q)  $m/z$ :  $[\text{M} + \text{Na}]^+$  Calcd. For  $\text{C}_{15}\text{H}_{14}\text{ClNO}_3\text{S}_2\text{Na}$  378.0001; Found 378.0001.

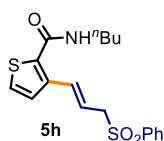

**(E)-N-butyl-3-(3-(phenylsulfonyl)prop-1-en-1-yl)thiophene-2-carboxamide (5h):** Pale yellow solid; yield 83% (90 mg); Eluent- 55-60% ethyl acetate in hexane;  $^1\text{H}$  NMR (400 MHz, Chloroform-*d*)  $\delta$  7.92 – 7.82 (m, 2H), 7.70 – 7.60 (m, 1H), 7.59 – 7.50 (m, 2H), 7.27 (d,  $J$  = 5.4 Hz, 1H), 7.21 – 7.12 (m, 2H), 6.14 – 6.00 (m, 1H), 6.02 – 5.94 (m, 1H), 3.96 (d,  $J$  = 7.6 Hz, 2H), 3.36 (q,  $J$  = 6.7 Hz, 2H), 1.59 – 1.51 (m, 2H), 1.40 – 1.32 (m, 2H), 0.94 (t,  $J$  = 7.3 Hz, 3H) ppm;  $^{13}\text{C}$  NMR (101 MHz,  $\text{CDCl}_3$ )  $\delta$  162.3, 139.7, 138.7, 134.0, 133.1, 132.6, 129.3, 128.4, 127.0, 126.9, 118.4, 60.6, 40.0, 31.7, 20.2, 13.9 ppm; HRMS (ESI/TOF-Q)  $m/z$ :  $[\text{M} + \text{Na}]^+$  Calcd. For  $\text{C}_{18}\text{H}_{21}\text{NO}_3\text{S}_2\text{Na}$  386.0861; Found 386.0862.

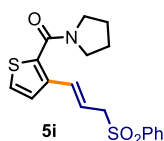

**(E)-3-(3-(phenylsulfonyl)prop-1-en-1-yl)thiophen-2-yl(pyrrolidin-1-yl)methanone (5i):** Pale yellow solid; yield 80% (87 mg); Eluent- 50-55% ethyl acetate in hexane;  $^1\text{H}$  NMR (400 MHz, Chloroform-*d*)  $\delta$  7.87 (d,  $J$  = 7.7 Hz, 2H), 7.72 – 7.59 (m, 1H), 7.59 – 7.48 (m, 2H), 7.28 (d,  $J$  = 5.2 Hz, 1H), 7.13 (d,  $J$  = 5.2 Hz, 1H), 6.63 (d,  $J$  = 15.8 Hz, 1H), 6.09 – 5.98 (m, 1H), 3.93 (d,  $J$  = 7.6 Hz, 2H), 3.59 – 3.52 (m, 2H), 3.37 – 3.27 (m, 2H), 2.10-1.73 (m, 4H) ppm;  $^{13}\text{C}$  NMR (101 MHz,  $\text{CDCl}_3$ )  $\delta$  163.2, 138.8, 137.8, 133.9, 133.6, 131.9, 129.3, 128.4, 126.8, 125.1, 117.2, 60.5, 49.4, 46.7, 26.2, 24.5 ppm; HRMS (ESI/TOF-Q)  $m/z$ :  $[\text{M} + \text{Na}]^+$  Calcd. For  $\text{C}_{18}\text{H}_{19}\text{NO}_3\text{S}_2\text{Na}$  384.0704; Found 384.0707.

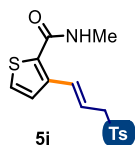

**(E)-N-methyl-3-(3-(tosyl)prop-1-en-1-yl)thiophene-2-carboxamide (5j):** Pale yellow solid; yield 85% (85 mg); Eluent- 60-65% ethyl acetate in hexane;  $^1\text{H}$  NMR (400 MHz, Chloroform-*d*)  $\delta$  7.75 (d,  $J$  = 8.4 Hz, 2H), 7.34 (d,  $J$  = 7.9 Hz, 2H), 7.28 (d,  $J$  = 4.4 Hz, 1H), 7.20 – 7.09 (m, 2H), 6.12 – 5.96 (m, 2H), 3.94 (d,  $J$  = 7.5 Hz, 2H), 2.92 (d,  $J$  = 4.4 Hz, 3H), 2.43 (s, 3H) ppm;  $^{13}\text{C}$  NMR (101 MHz,  $\text{CDCl}_3$ )  $\delta$  163.1, 145.1, 139.6, 135.8, 133.1, 132.5, 130.0, 128.4, 127.2, 126.9, 118.9, 60.6, 27.0, 21.7 ppm; HRMS (ESI/TOF-Q)  $m/z$ :  $[\text{M} + \text{Na}]^+$  Calcd. For  $\text{C}_{16}\text{H}_{17}\text{NO}_3\text{S}_2\text{Na}$  358.0548; Found 358.0551.



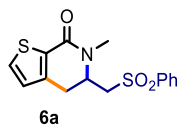

**(R)-6-methyl-5-((phenylsulfonyl)methyl)-5,6-dihydrothieno[2,3-c]pyridin-7(4H)-one (6a):** White solid; yield 72% (69 mg); Eluent- 30-35% ethyl acetate in hexane;  $^1\text{H}$  NMR (400 MHz, Chloroform-*d*)  $\delta$  7.89 (d,  $J$  = 8.3 Hz, 2H), 7.71 – 7.65 (m, 1H), 7.61 – 7.54 (m, 2H), 7.50 – 7.46 (m, 1H), 6.93 – 6.89 (m, 1H), 4.35 – 4.18 (m, 1H), 3.41 – 3.32 (m, 2H), 3.31 – 3.24 (m, 1H), 3.13 (d,  $J$  = 14.0 Hz, 1H), 2.98 (s, 3H) ppm;  $^{13}\text{C}$  NMR (101 MHz,  $\text{CDCl}_3$ )  $\delta$  160.7, 141.0, 139.4, 134.4, 131.9, 131.3, 129.7, 127.9, 127.6, 56.2, 54.8, 32.9, 29.1 ppm; HRMS (ESI)  $m/z$ :  $[\text{M} + \text{Na}]^+$  Calcd. For  $\text{C}_{15}\text{H}_{15}\text{NO}_3\text{S}_2\text{Na}$  344.0391; Found 344.0398.

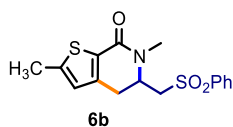

**(R)-2,6-dimethyl-5-((phenylsulfonyl)methyl)-5,6-dihydrothieno[2,3-c]pyridin-7(4H)-one (6b):** White solid; yield 65% (65 mg); Eluent- 30-35% ethyl acetate in hexane;  $^1\text{H}$  NMR (400 MHz, Chloroform-*d*)  $\delta$  7.90 (d,  $J$  = 7.4 Hz, 2H), 7.74 – 7.64 (m, 1H), 7.63 – 7.53 (m, 2H), 6.59 (s, 1H), 4.27 – 4.14 (m, 1H), 3.50 – 3.32 (m, 1H), 3.27 – 3.19 (m, 2H), 3.12 (d,  $J$  = 14.0 Hz, 1H), 2.95 (s, 3H), 2.48 (s, 3H) ppm;  $^{13}\text{C}$  NMR (101 MHz,  $\text{CDCl}_3$ )  $\delta$  160.8, 147.7, 141.5, 139.5, 134.3, 129.7, 128.9, 127.9, 126.2, 56.2, 54.7, 32.8, 29.2, 16.0 ppm; HRMS (ESI)  $m/z$ :  $[\text{M} + \text{Na}]^+$  Calcd. For  $\text{C}_{16}\text{H}_{17}\text{NO}_3\text{S}_2\text{Na}$  358.0548; Found 358.0551.

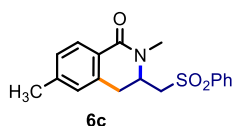

**(R)-2,6-dimethyl-3-((phenylsulfonyl)methyl)-3,4-dihydroisoquinolin-1(2H)-one (6c):** White solid; yield 52% (51 mg); Eluent- 30-35% ethyl acetate in hexane;  $^1\text{H}$  NMR (500 MHz, Chloroform-*d*)  $\delta$  7.87 – 7.84 (m, 3H), 7.68 – 7.63 (m, 1H), 7.59 – 7.51 (m, 2H), 7.12 (d,  $J$  = 7.9 Hz, 1H), 6.93 (s, 1H), 4.24 – 4.12 (m, 1H), 3.39 (dd,  $J$  = 16.1, 5.7 Hz, 1H), 3.27 – 3.16 (m, 1H), 3.16 – 3.06 (m, 2H), 3.02 (s, 3H), 2.34 (s, 3H) ppm;  $^{13}\text{C}$  NMR (126 MHz,  $\text{CDCl}_3$ )  $\delta$  164.0, 143.0, 139.4, 134.8, 134.2, 129.6, 129.0, 128.4, 128.2, 127.8, 126.1, 56.2, 53.5, 33.7, 32.1, 21.6 ppm; HRMS (ESI)  $m/z$ :  $[\text{M} + \text{Na}]^+$  Calcd. For  $\text{C}_{18}\text{H}_{19}\text{NO}_3\text{SNa}$  352.0983; Found 352.0980.

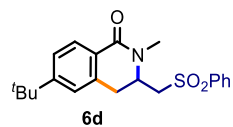

**(R)-6-(tert-butyl)-2-methyl-3-((phenylsulfonyl)methyl)-3,4-dihydroisoquinolin-1(2H)-one (6d):** White solid; yield 53% (59 mg); Eluent- 30-35% ethyl acetate in hexane;  $^1\text{H}$  NMR (400 MHz, Chloroform-*d*)  $\delta$  7.94 – 7.84 (m, 3H), 7.73 – 7.63 (m, 1H), 7.64 – 7.55 (m, 2H), 7.36 (d,  $J$  = 8.3 Hz, 1H), 7.11 (s, 1H), 4.37 – 3.95 (m, 1H), 3.51 – 3.34 (m, 1H), 3.32 – 3.22 (m, 1H), 3.13 (d,  $J$  = 16.0 Hz, 2H), 3.02 (s, 3H), 1.32 (s, 9H) ppm;  $^{13}\text{C}$  NMR (101 MHz,  $\text{CDCl}_3$ )  $\delta$  164.1, 156.2, 139.5, 134.6, 134.3, 129.7, 128.1, 127.9, 126.1, 125.2, 124.9, 56.4, 53.6, 35.1, 33.7, 32.5, 31.3 ppm; HRMS (ESI)  $m/z$ :  $[\text{M} + \text{Na}]^+$  Calcd. For  $\text{C}_{21}\text{H}_{25}\text{NO}_3\text{SNa}$  394.1453; Found 394.1454.

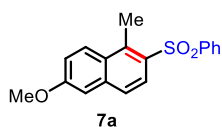

**6-methoxy-1-methyl-2-(phenylsulfonyl)naphthalene (7a):** White solid; yield 89% (83 mg); Eluent- 20-25% ethyl acetate in hexane;  $^1\text{H}$  NMR (400 MHz, Chloroform-*d*)  $\delta$  8.26 (d,  $J$  = 8.9 Hz, 1H), 8.01 (d,  $J$  = 9.4 Hz, 1H), 7.88 (d,  $J$  = 7.7 Hz, 2H), 7.74 (d,  $J$  = 8.8 Hz, 1H), 7.57 – 7.51 (m, 1H), 7.51 – 7.44 (m, 2H), 7.24 – 7.18 (m, 1H), 7.14 (d,  $J$  = 2.6 Hz, 1H), 3.94 (s, 3H), 2.81 (s, 3H) ppm;  $^{13}\text{C}$  NMR (101 MHz,  $\text{CDCl}_3$ )  $\delta$  159.7, 142.6, 137.4, 137.0, 134.0, 132.9, 129.1, 128.3, 127.4, 126.9, 125.8, 125.4, 120.2, 106.4, 55.6, 15.5 ppm; HRMS (ESI)  $m/z$ :  $[\text{M} + \text{Na}]^+$  Calcd. For  $\text{C}_{18}\text{H}_{16}\text{O}_3\text{SNa}$  335.0718; Found 335.0697; HRMS (ESI)  $m/z$ :  $[\text{M} + \text{H}]^+$  Calcd. For  $\text{C}_{18}\text{H}_{17}\text{O}_3\text{S}$  313.0898; Found 313.0885.

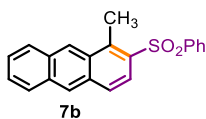

**1-methyl-2-(phenylsulfonyl)anthracene (7b):** Pale yellow solid; yield 92% (92 mg); Eluent- 20-25% ethyl acetate in hexane;  $^1\text{H}$  NMR (400 MHz, Chloroform-*d*)  $\delta$  8.70 (s, 1H), 8.43 (s, 1H), 8.21 (d,  $J = 9.1$  Hz, 1H), 8.06 – 7.98 (m, 3H), 7.97 – 7.90 (m, 2H), 7.61 – 7.45 (m, 5H), 3.03 (s, 3H) ppm;  $^{13}\text{C}$  NMR (101 MHz,  $\text{CDCl}_3$ )  $\delta$  142.6, 138.2, 135.7, 133.1 (2C), 132.4, 132.2, 131.0, 129.2, 129.0, 127.9, 127.6, 127.5, 127.3, 127.2, 126.4, 125.1, 123.1, 15.8 ppm; HRMS (ESI/TOF-Q)  $m/z$ :  $[\text{M} + \text{H}]^+$  Calcd. For  $\text{C}_{21}\text{H}_{17}\text{O}_2\text{S}$  333.0949; Found 333.0936.

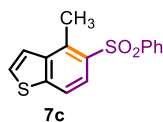

**4-methyl-5-(phenylsulfonyl)benzo[*b*]thiophene (7c):** Off-white solid; yield 84% (73 mg); Eluent- 20-25% ethyl acetate in hexane;  $^1\text{H}$  NMR (400 MHz, Chloroform-*d*)  $\delta$  8.27 – 8.21 (m, 1H), 7.92 – 7.87 (m, 2H), 7.85 – 7.80 (m, 1H), 7.66 – 7.62 (m, 1H), 7.58 – 7.52 (m, 1H), 7.52 – 7.45 (m, 2H), 7.43 – 7.38 (m, 1H), 2.74 (s, 3H) ppm;  $^{13}\text{C}$  NMR (101 MHz,  $\text{CDCl}_3$ )  $\delta$  143.1, 142.8, 142.2, 134.0, 133.2, 133.1, 130.9, 129.2, 127.6, 125.5, 124.8, 121.6, 18.7 ppm; HRMS (ESI/TOF-Q)  $m/z$ :  $[\text{M} + \text{H}]^+$  Calcd. For  $\text{C}_{15}\text{H}_{13}\text{O}_2\text{S}_2$  289.0357; Found 289.0347.

## **NMR Spectra of Synthesized Compounds**

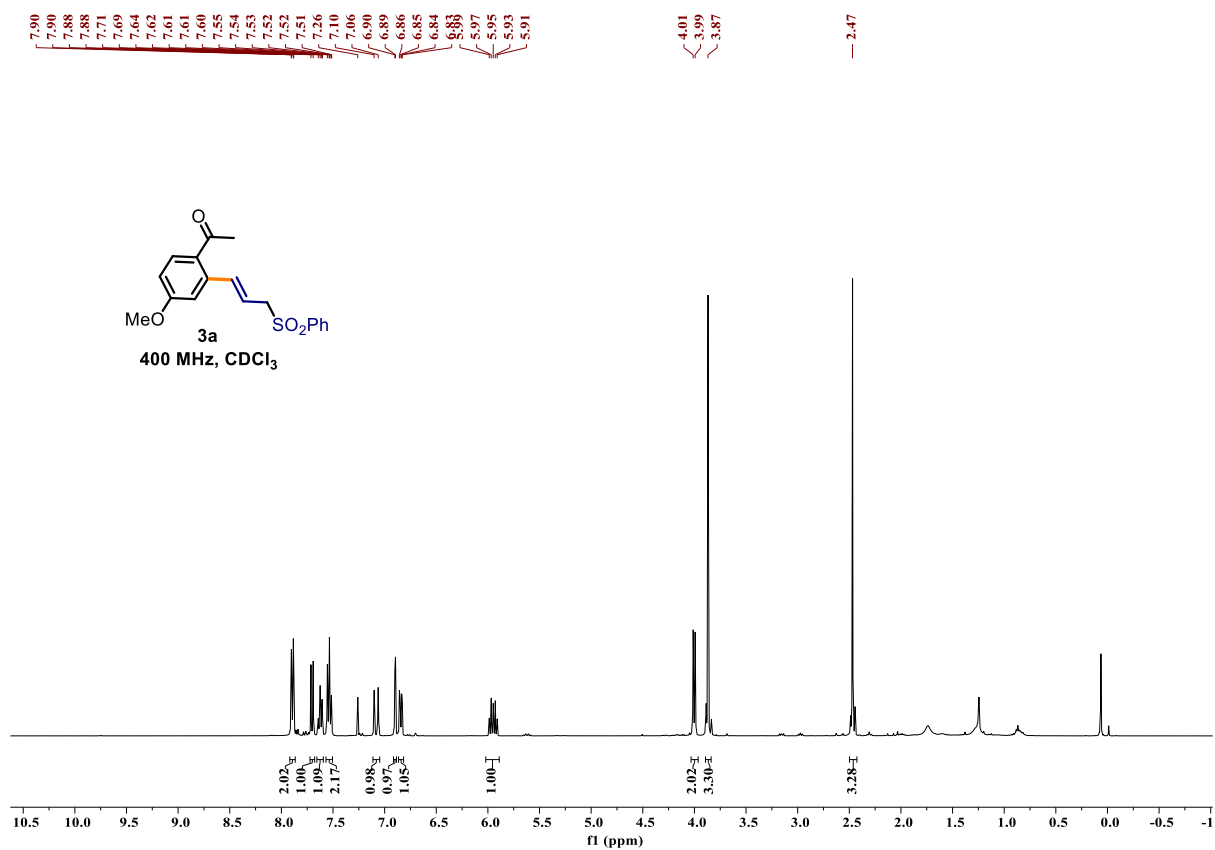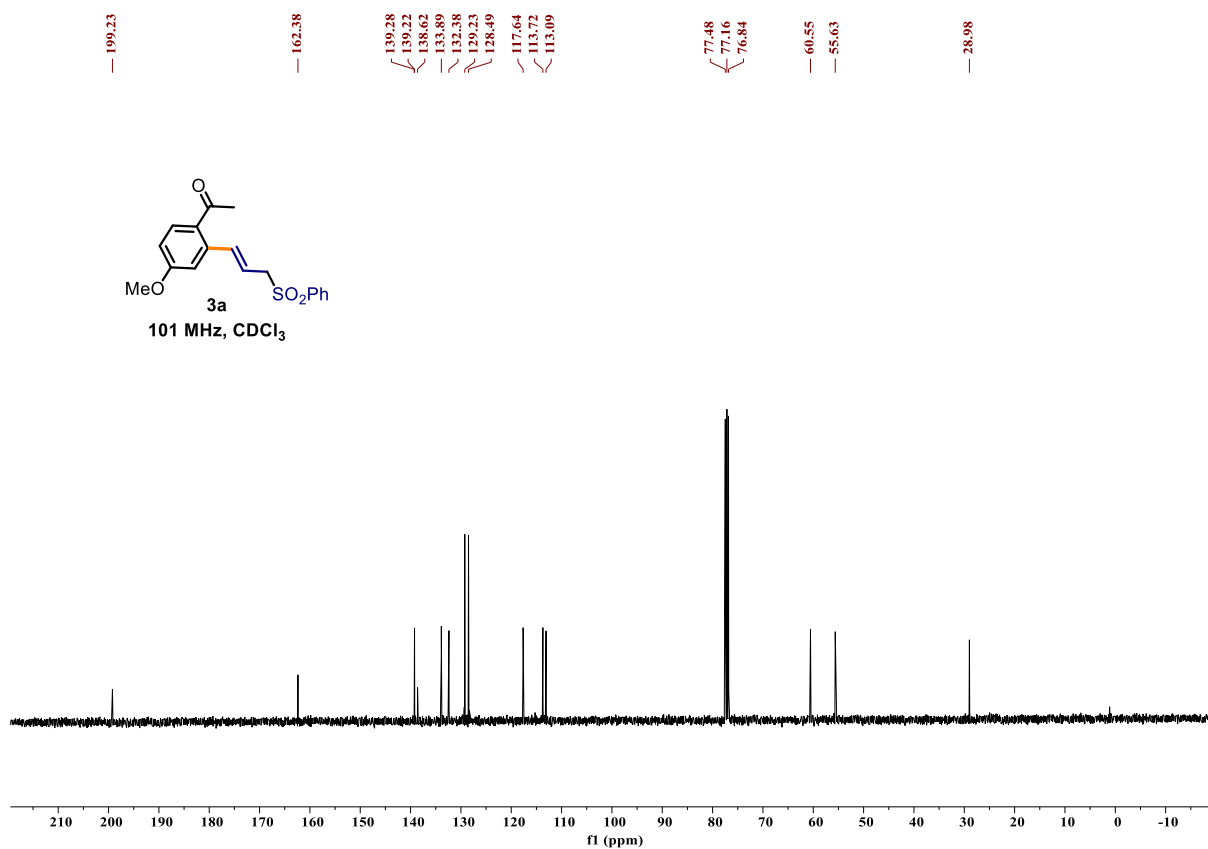

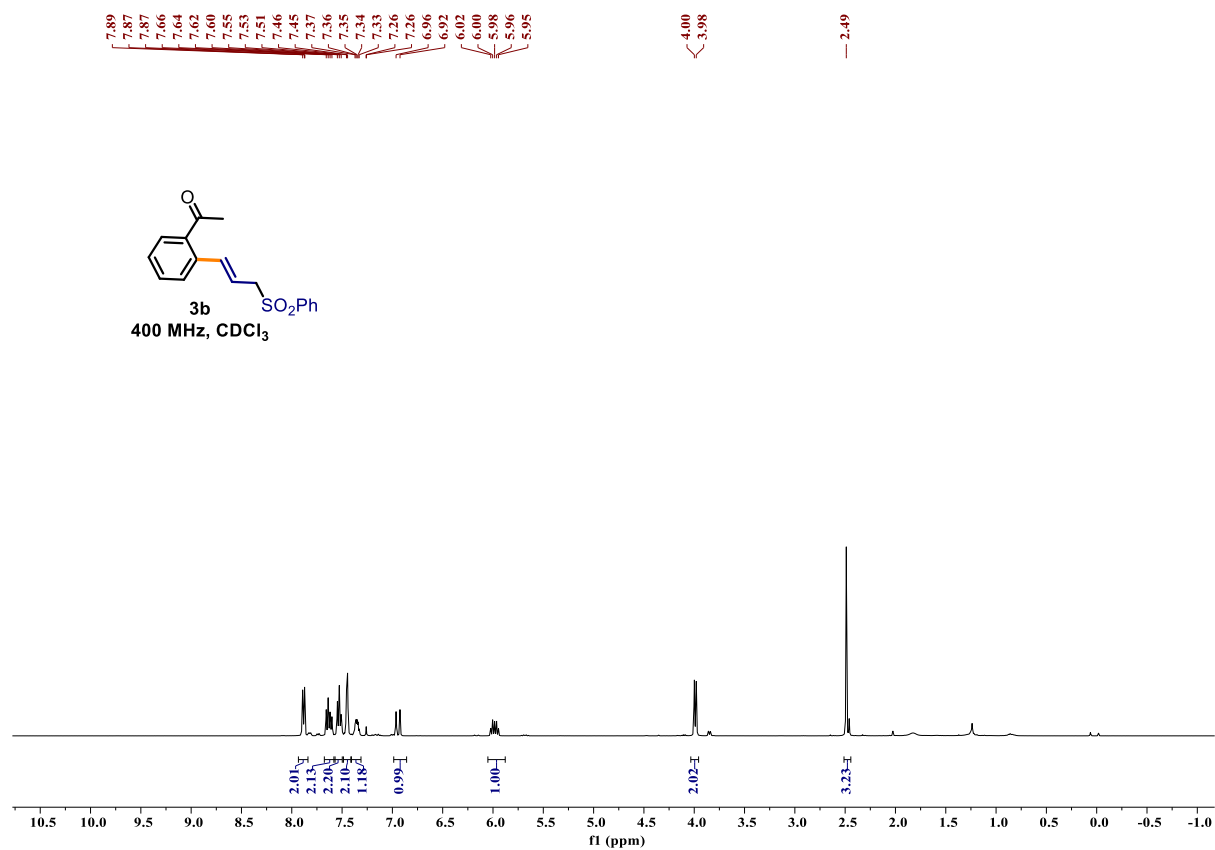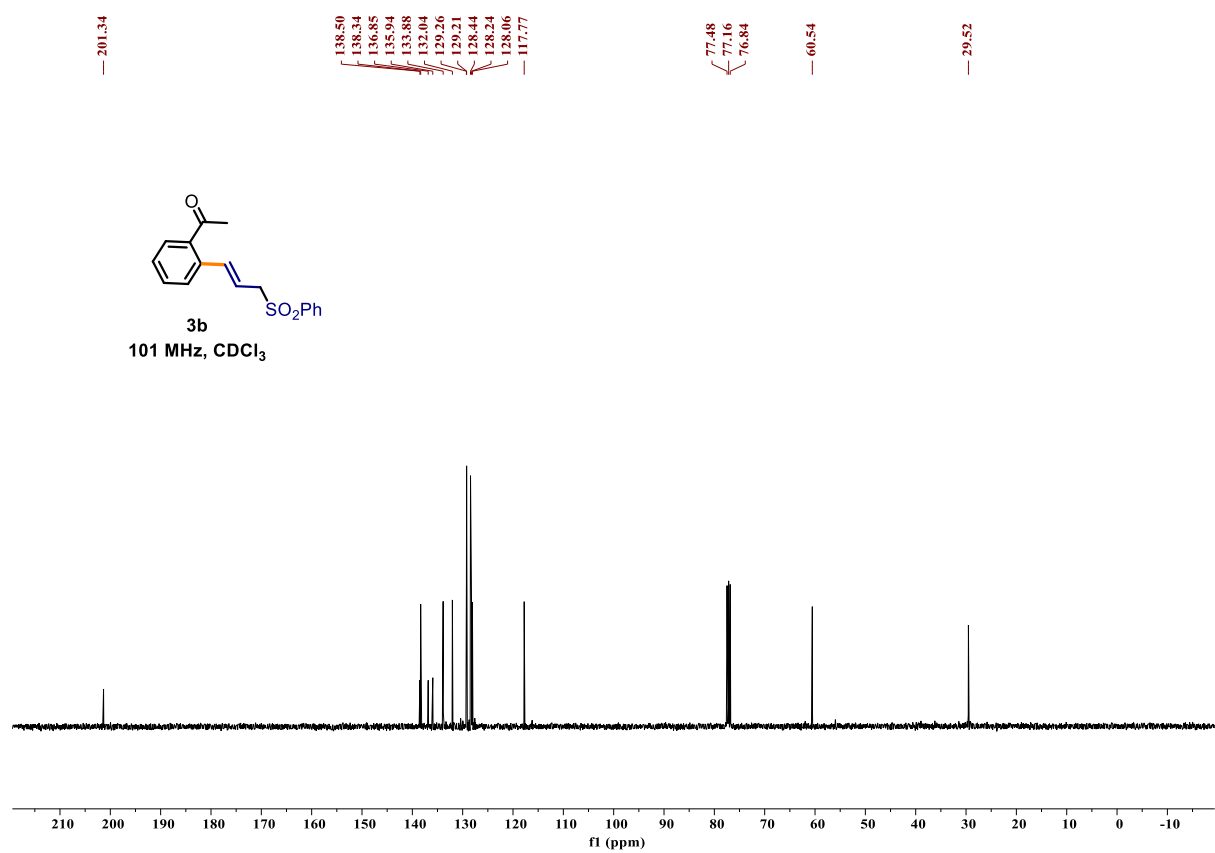

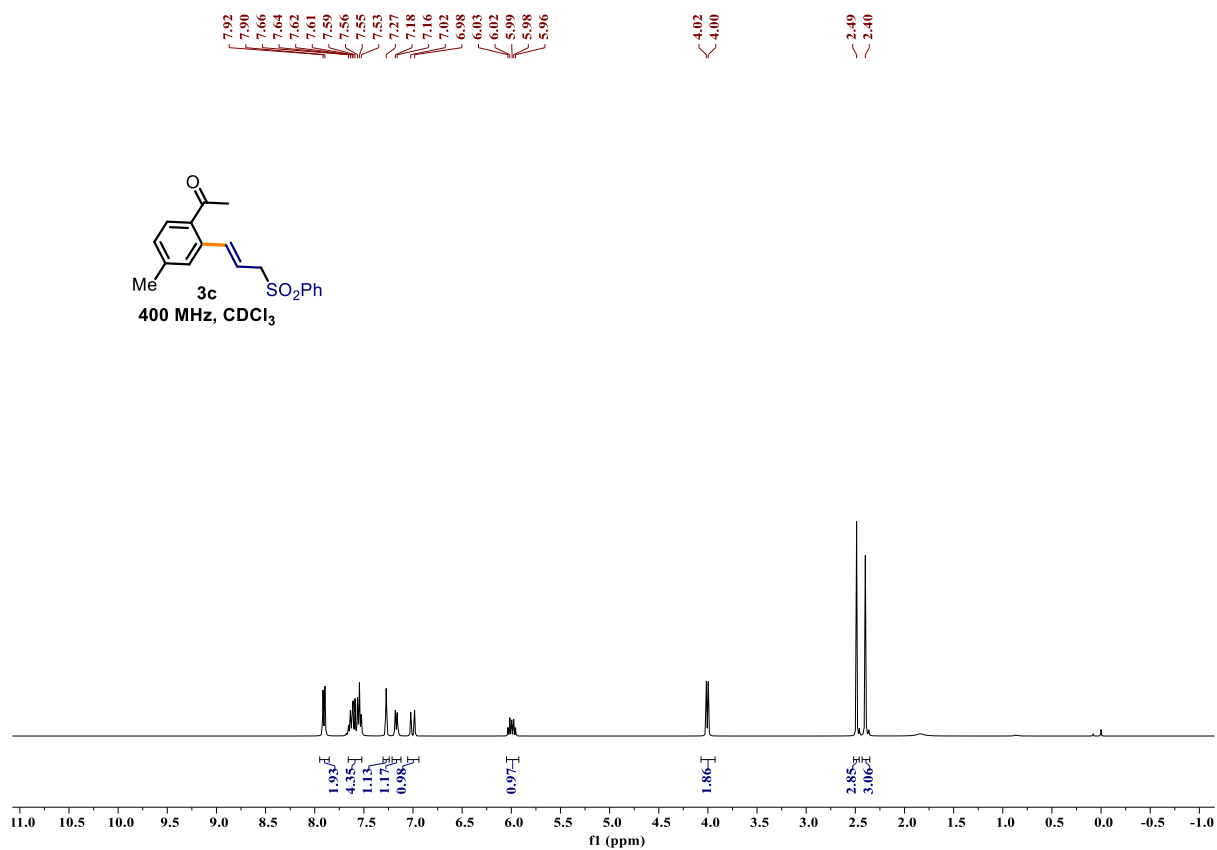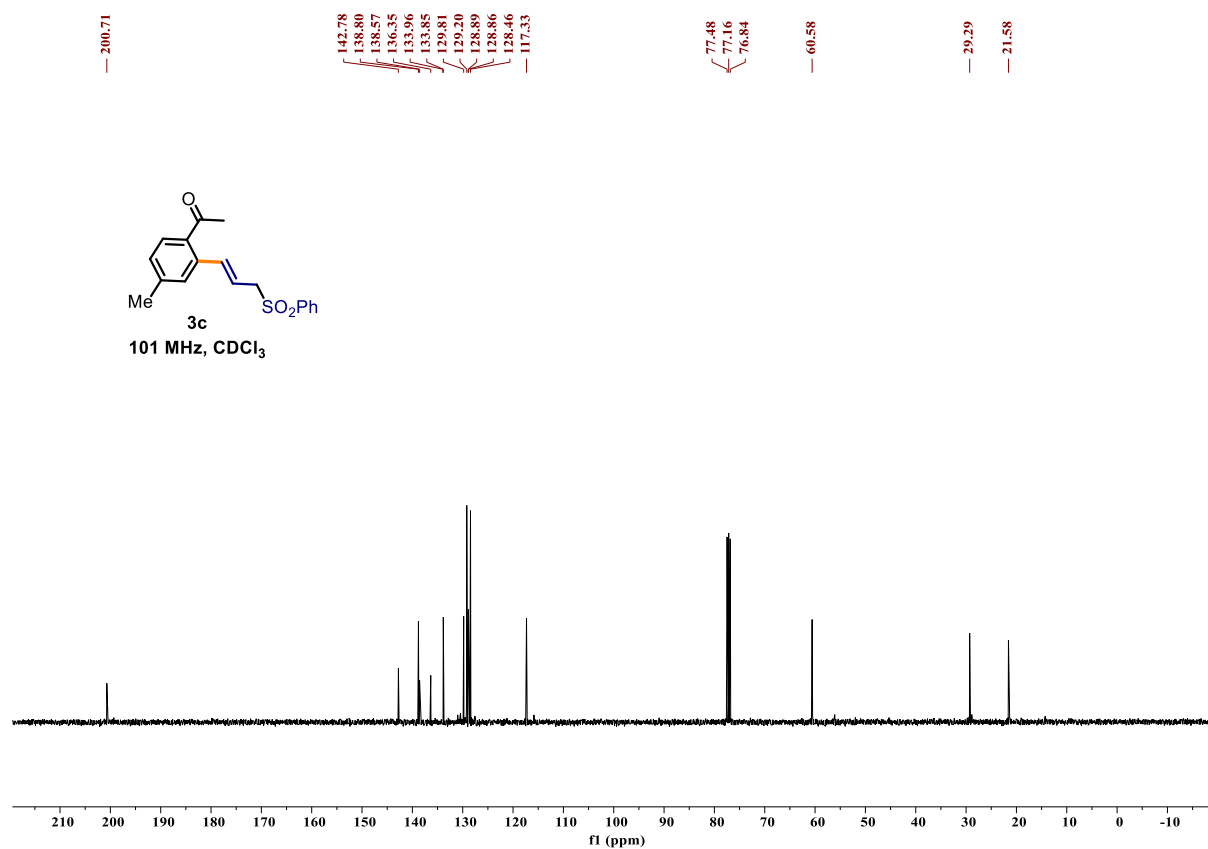

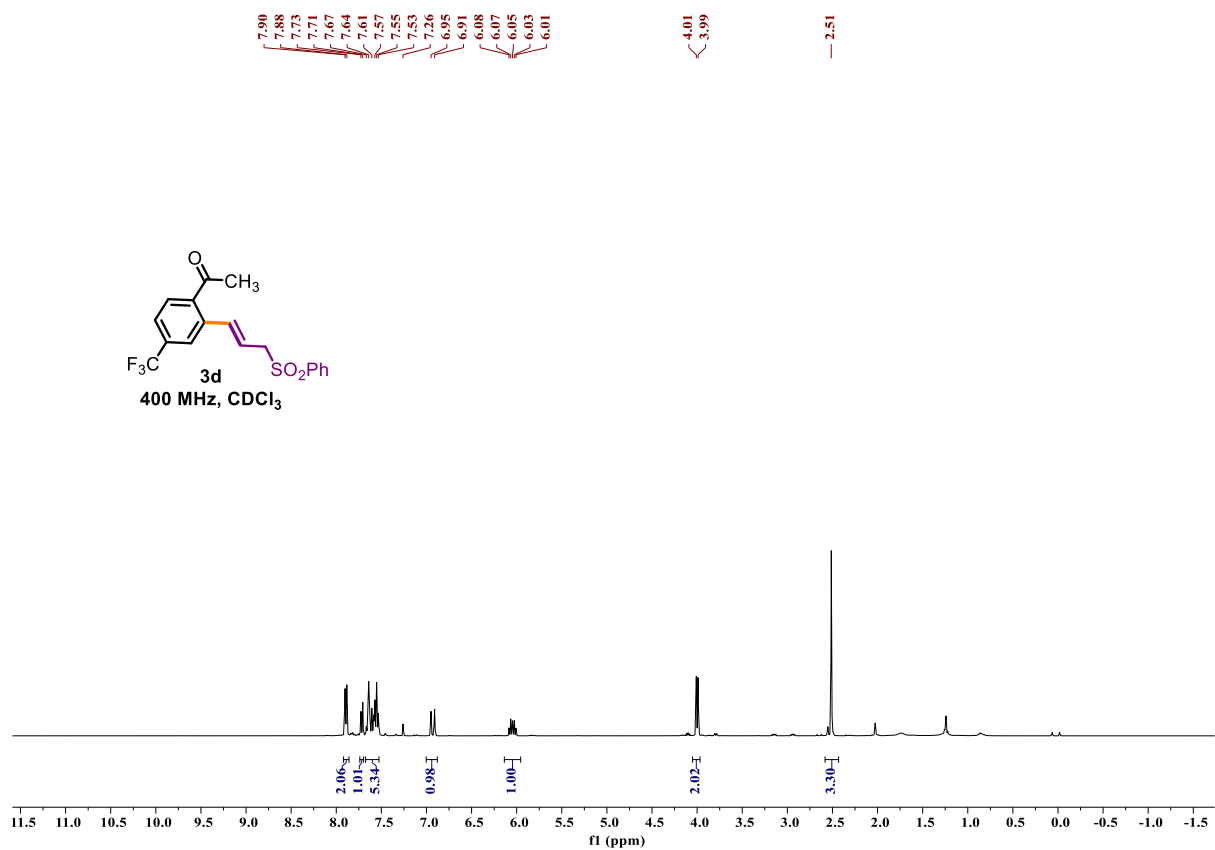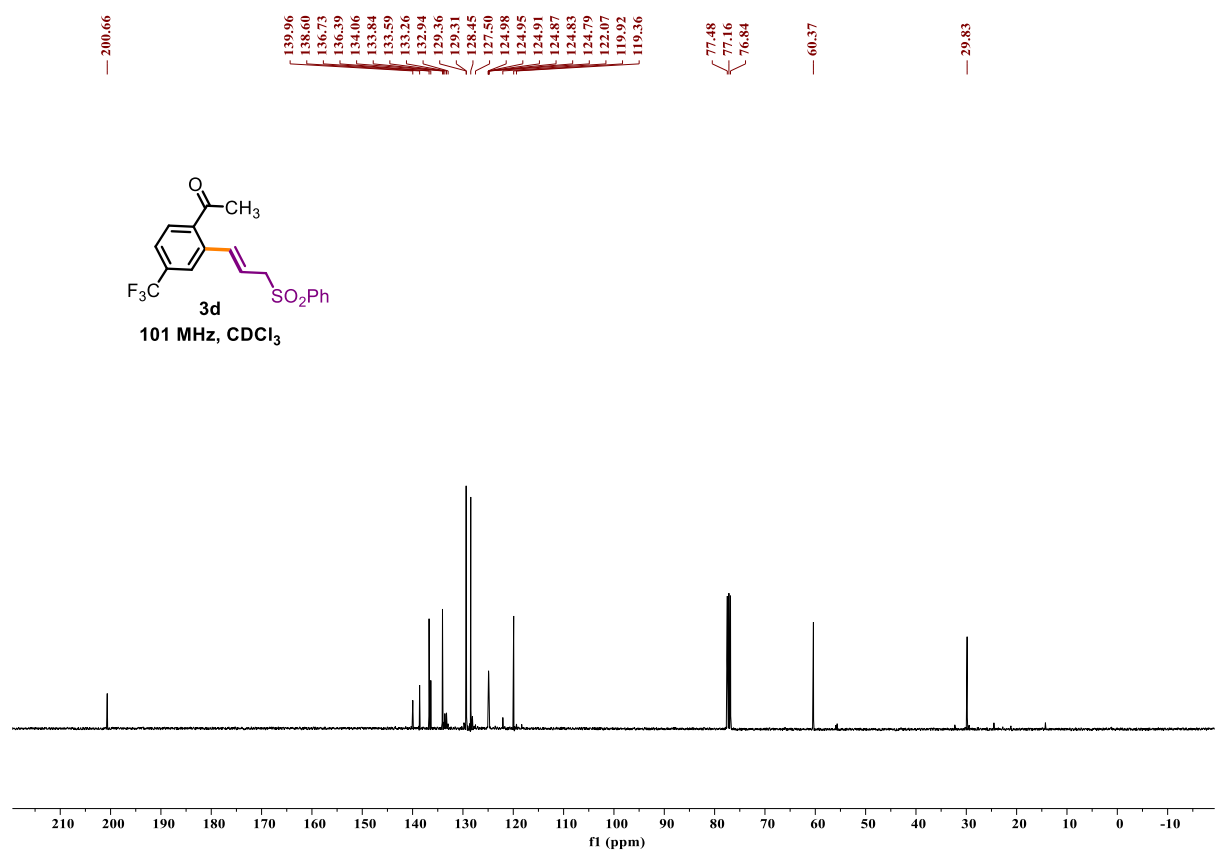

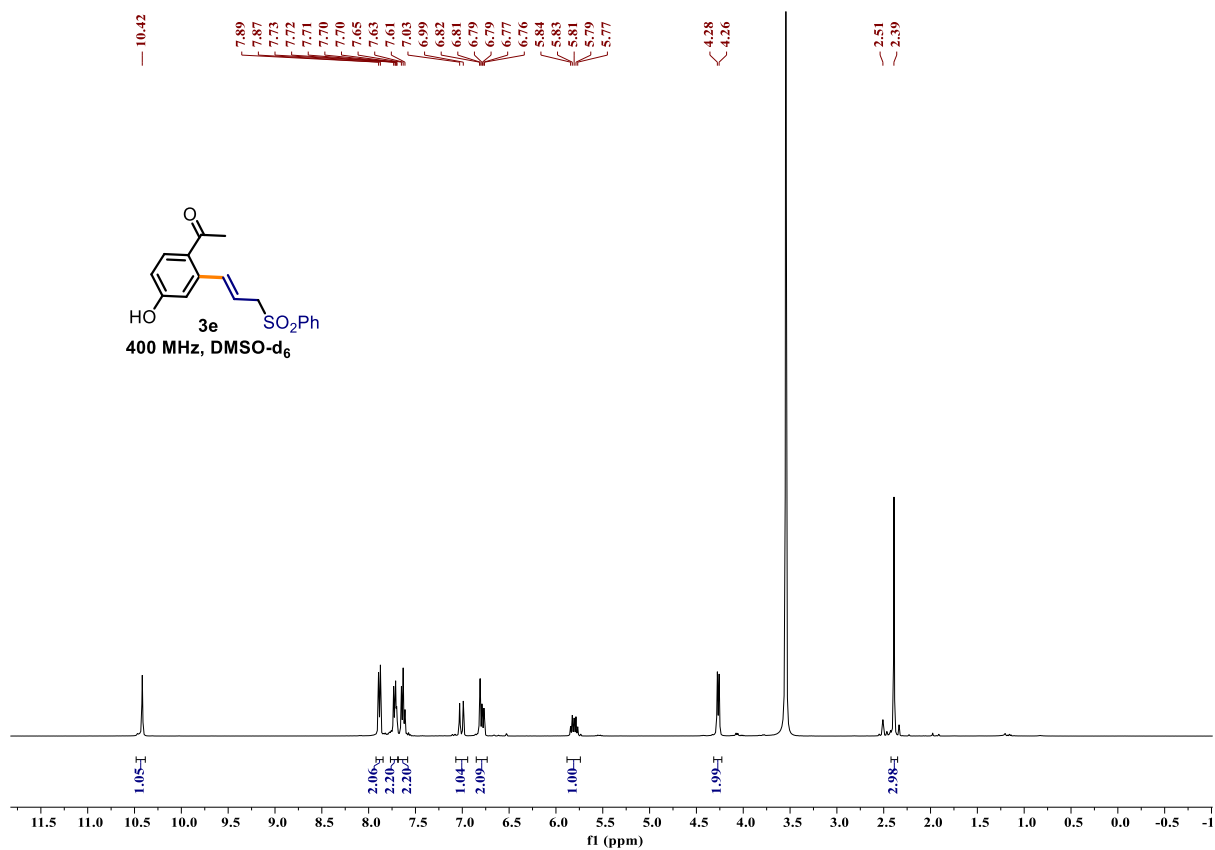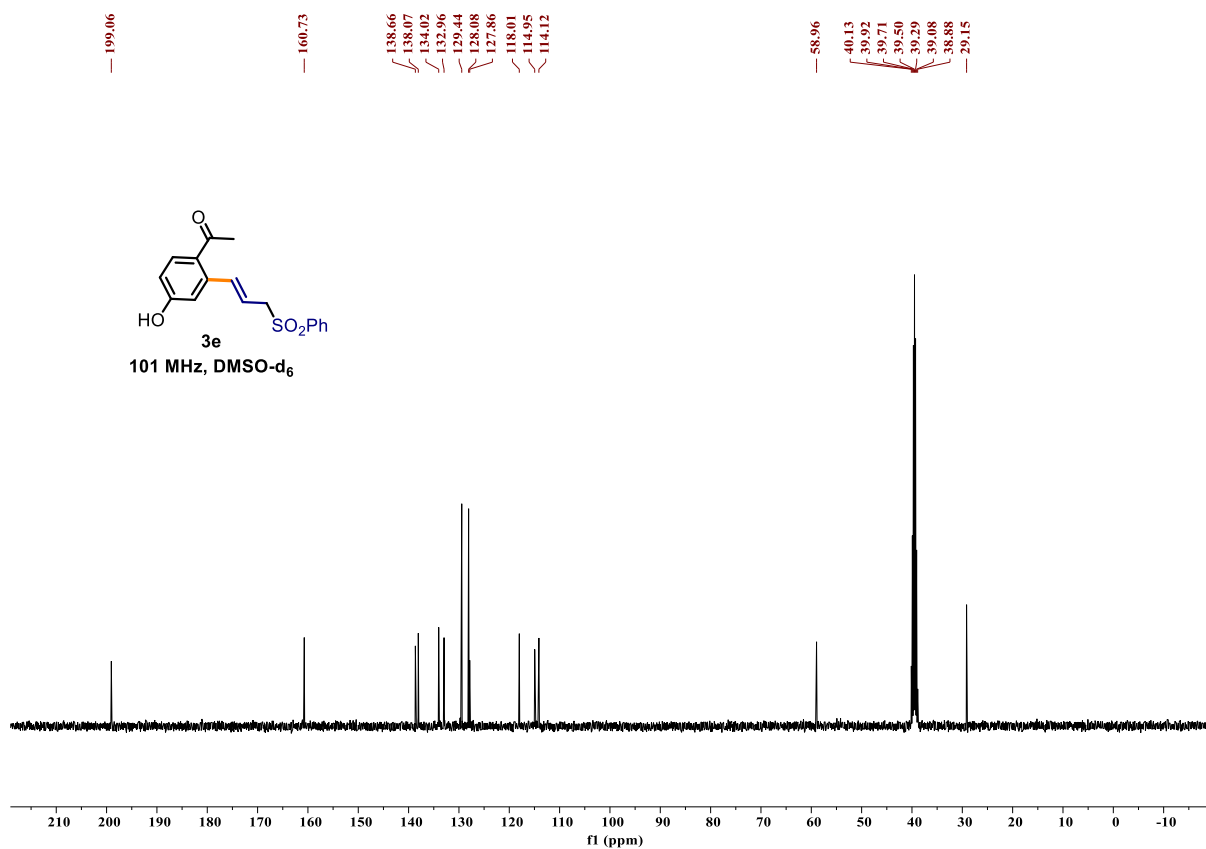



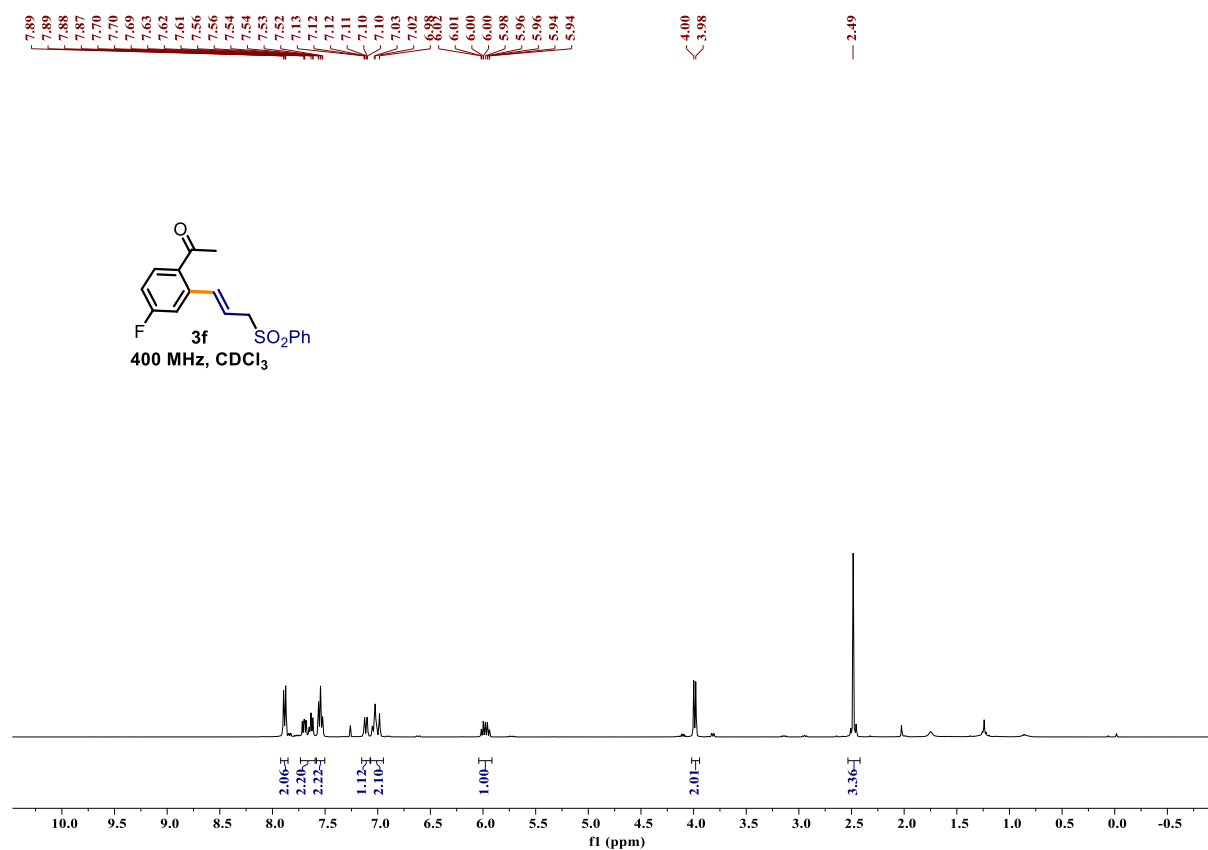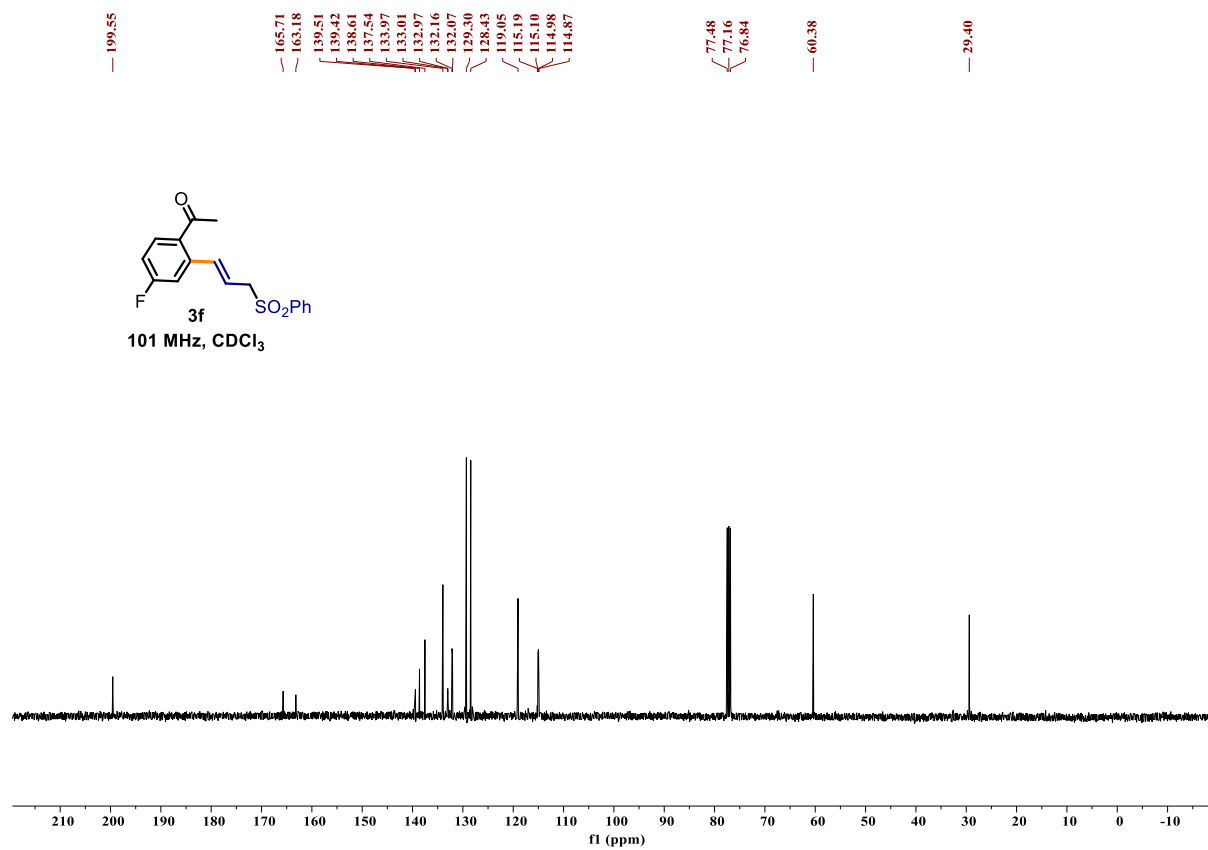

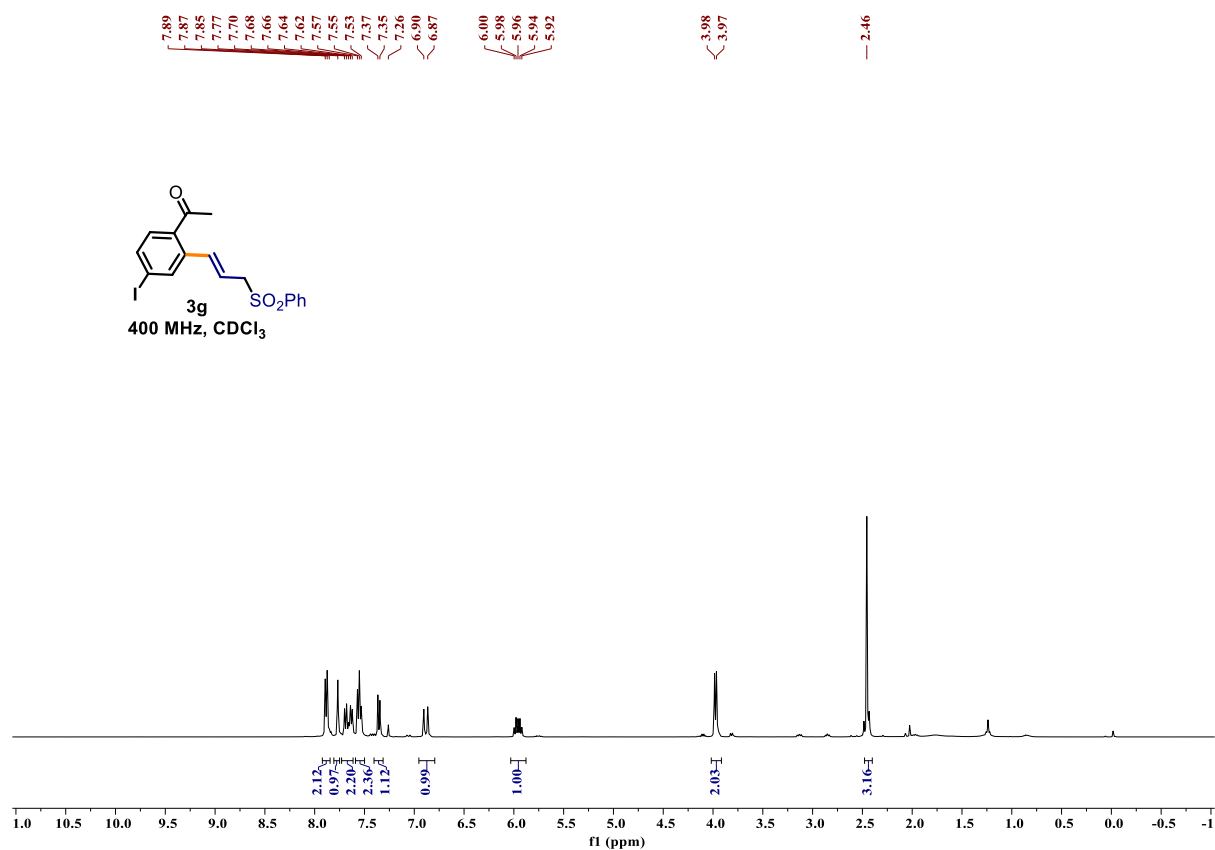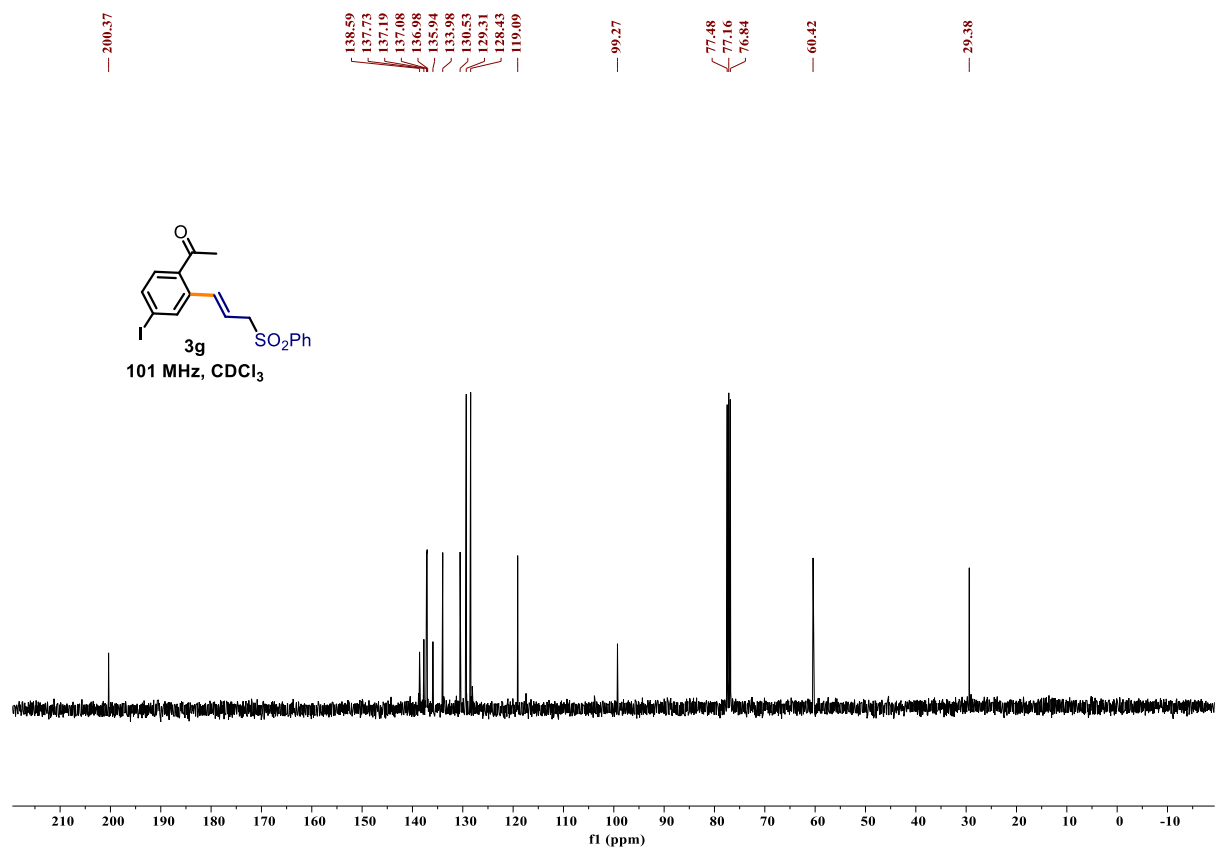

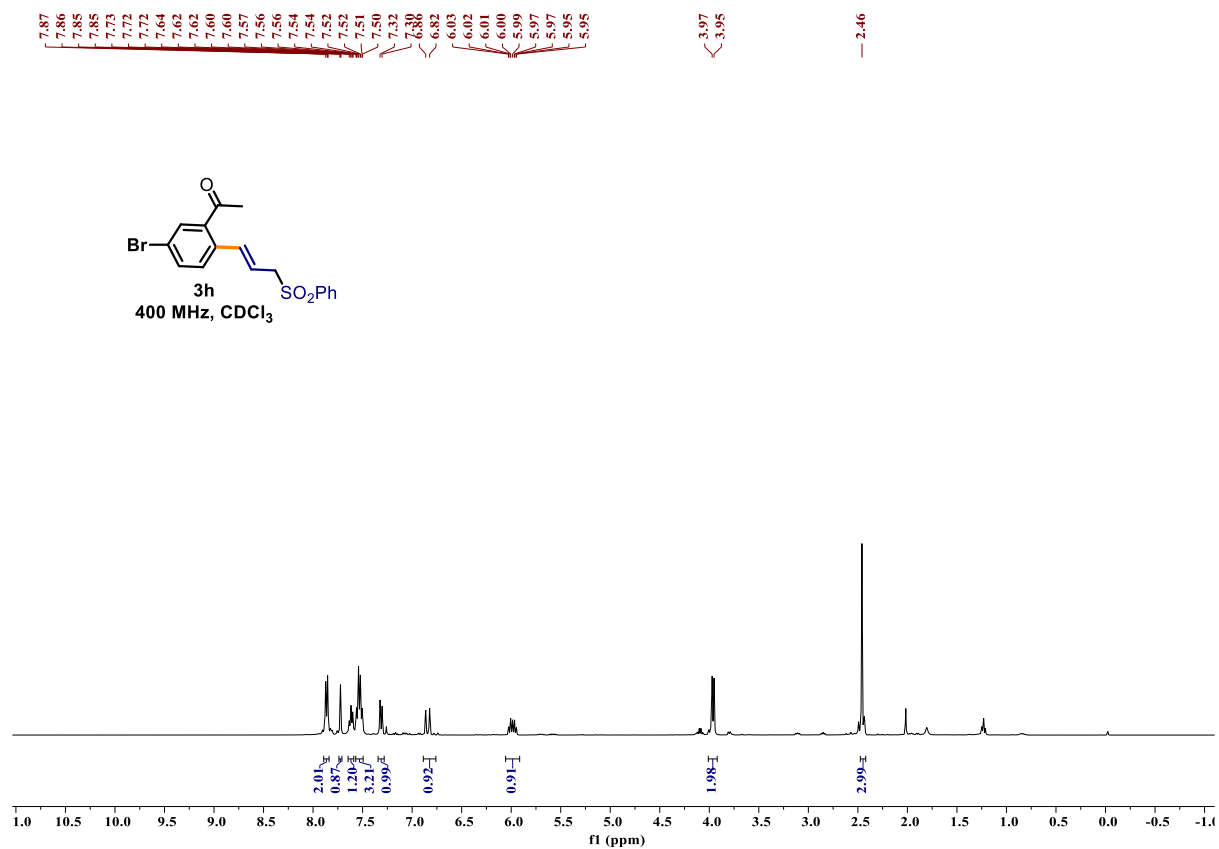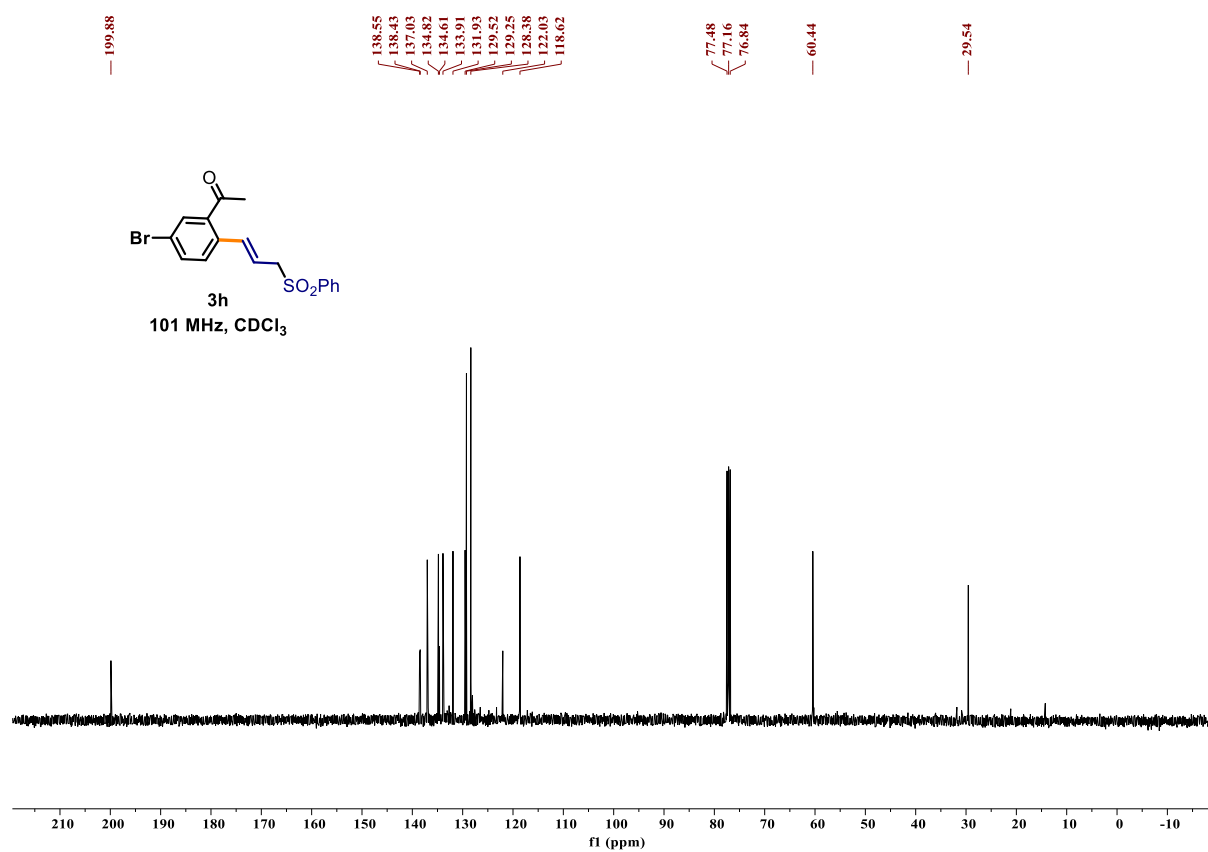

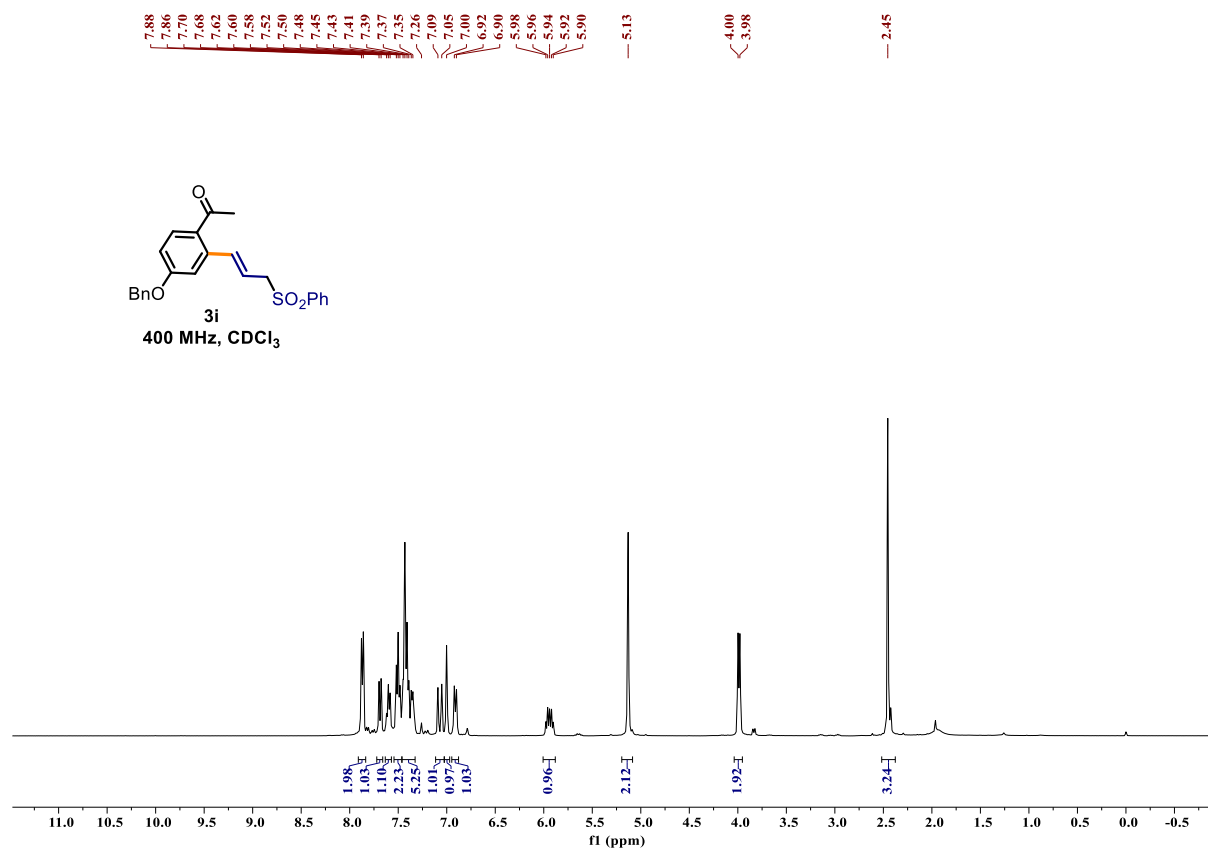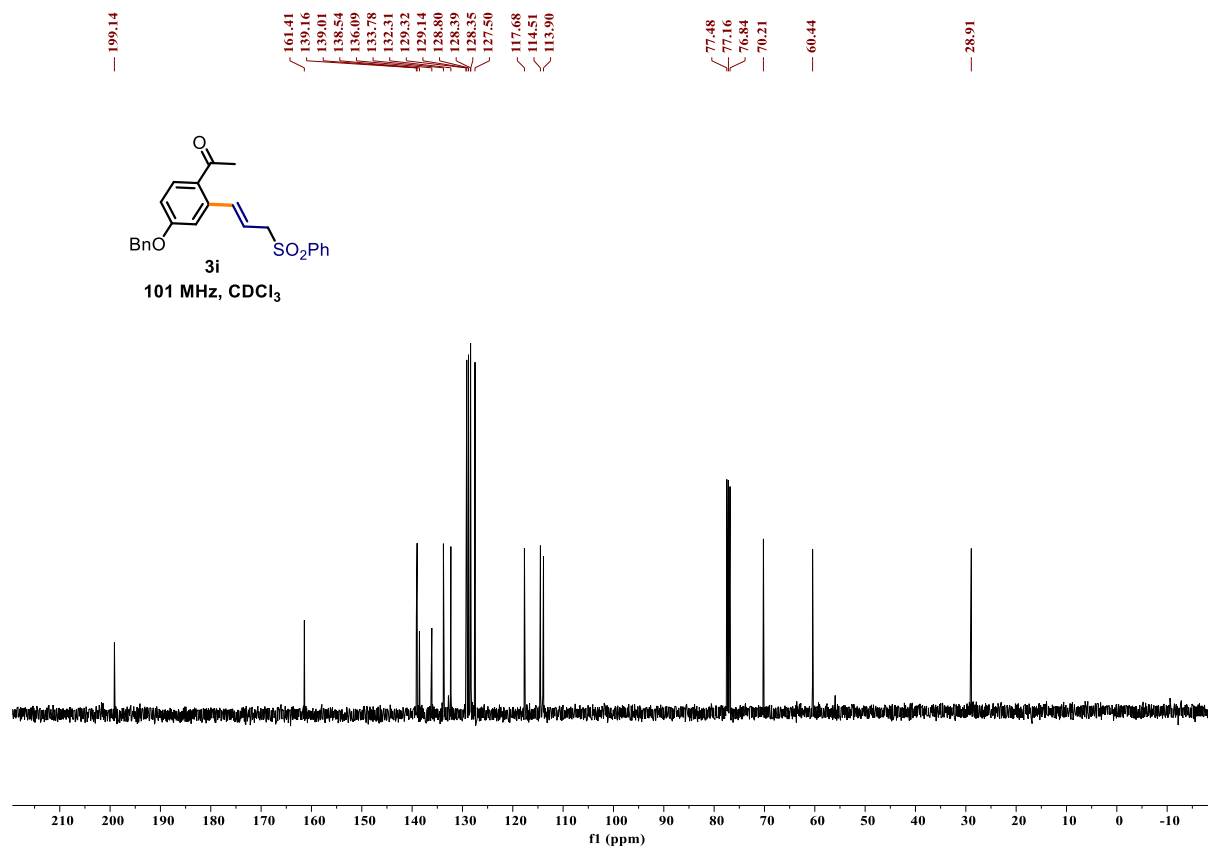

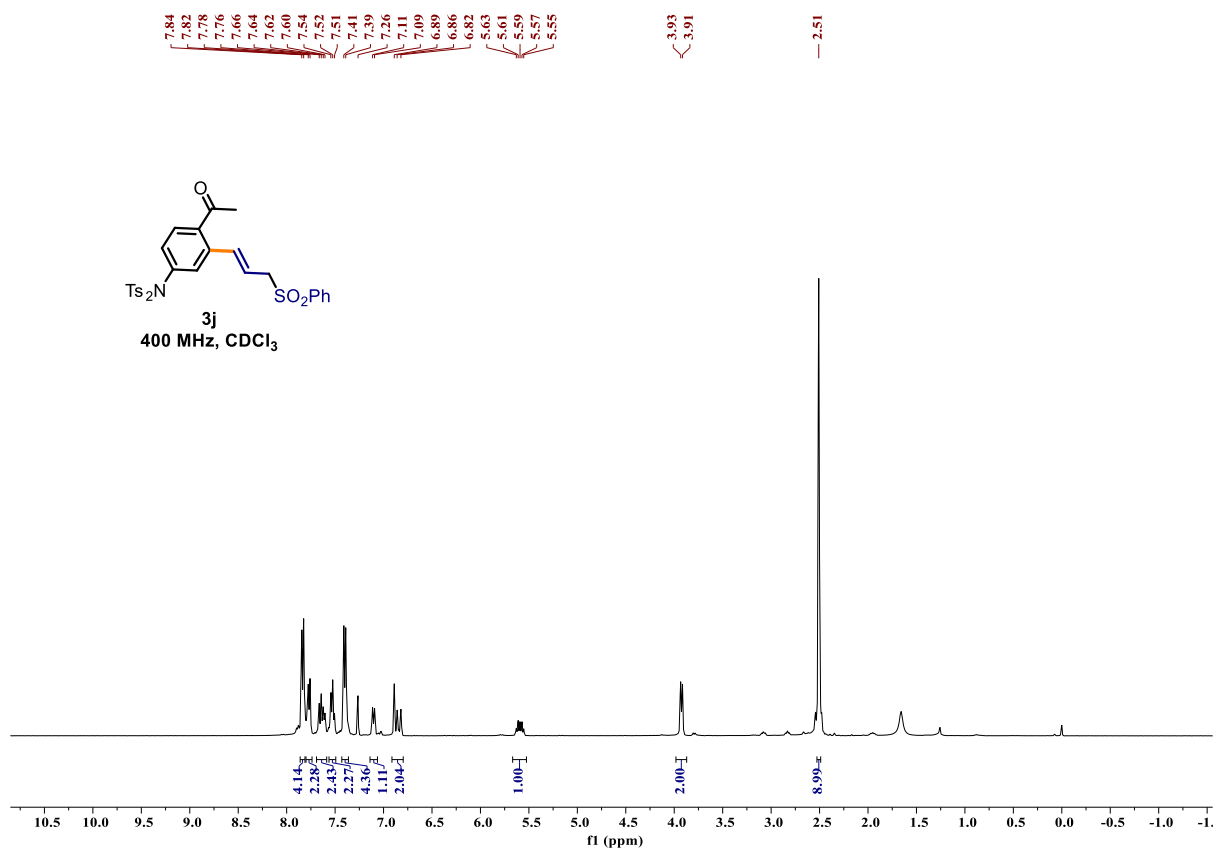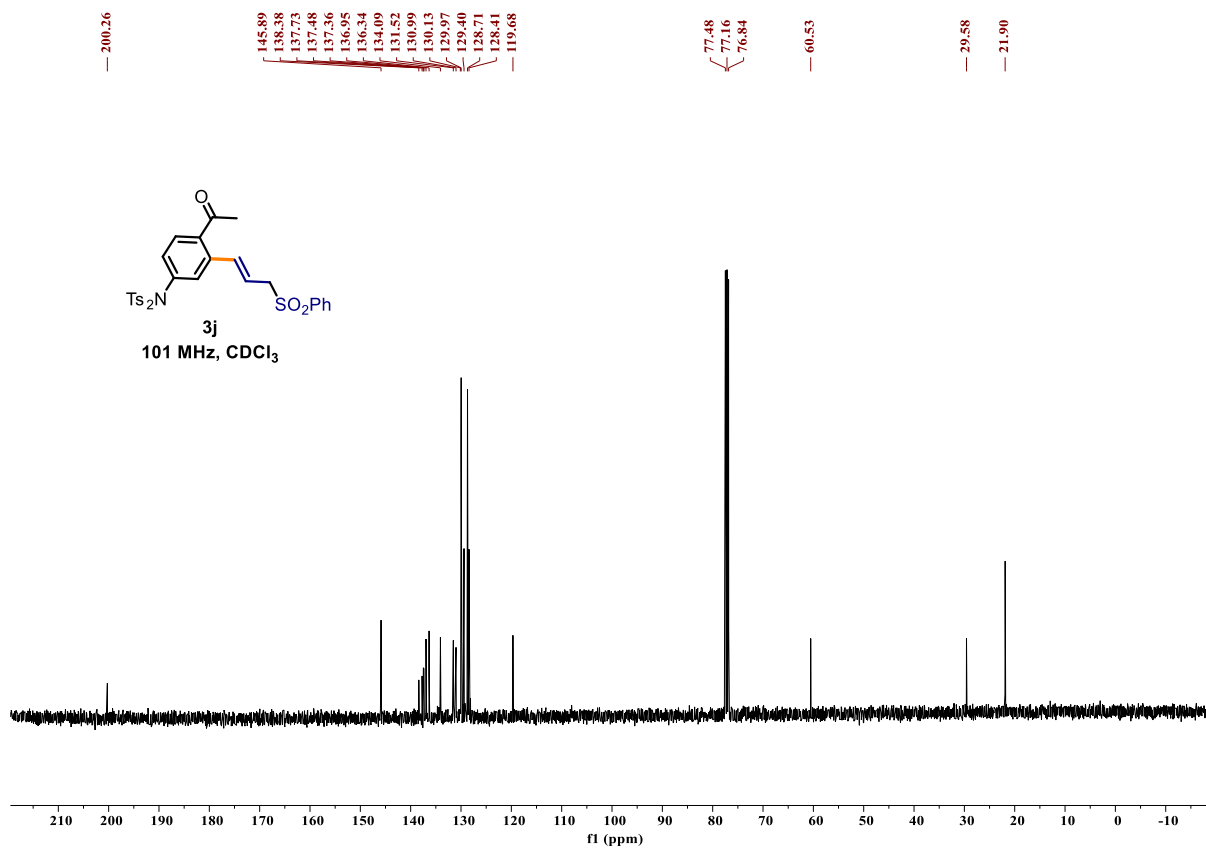

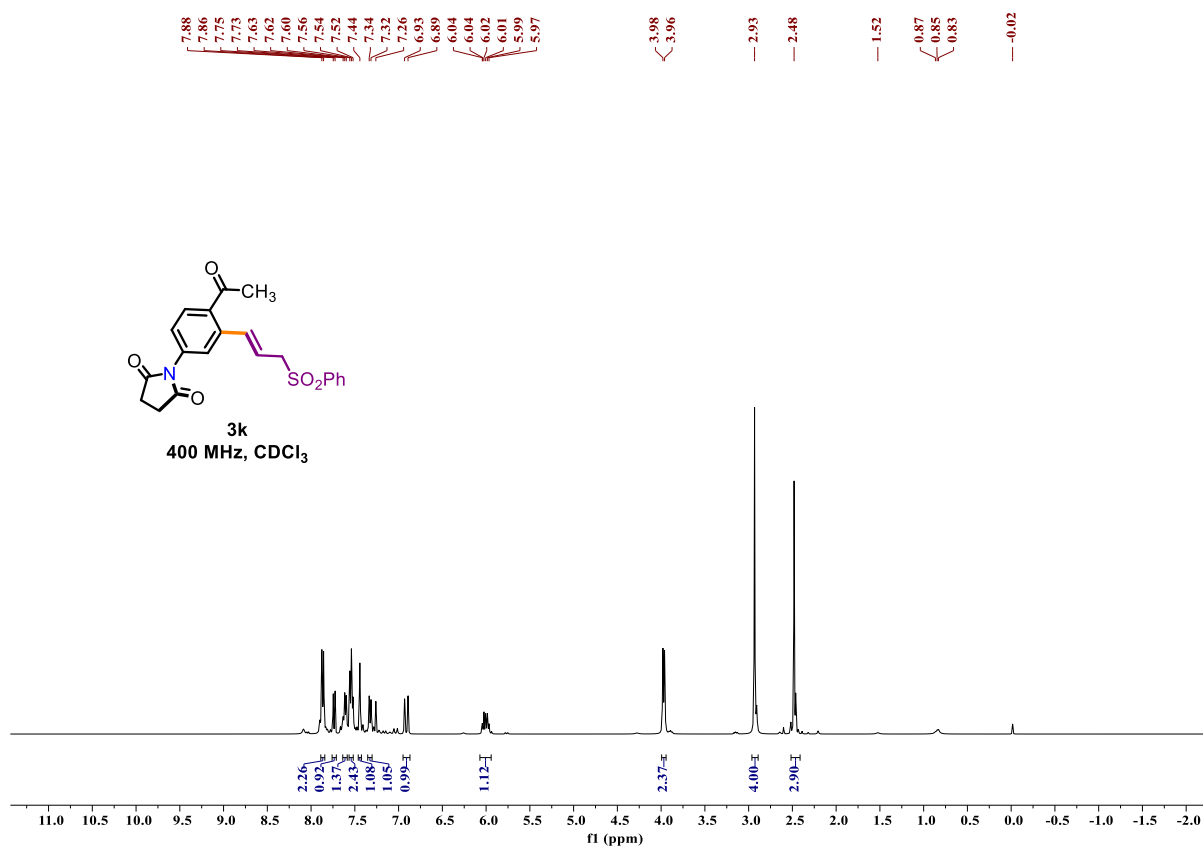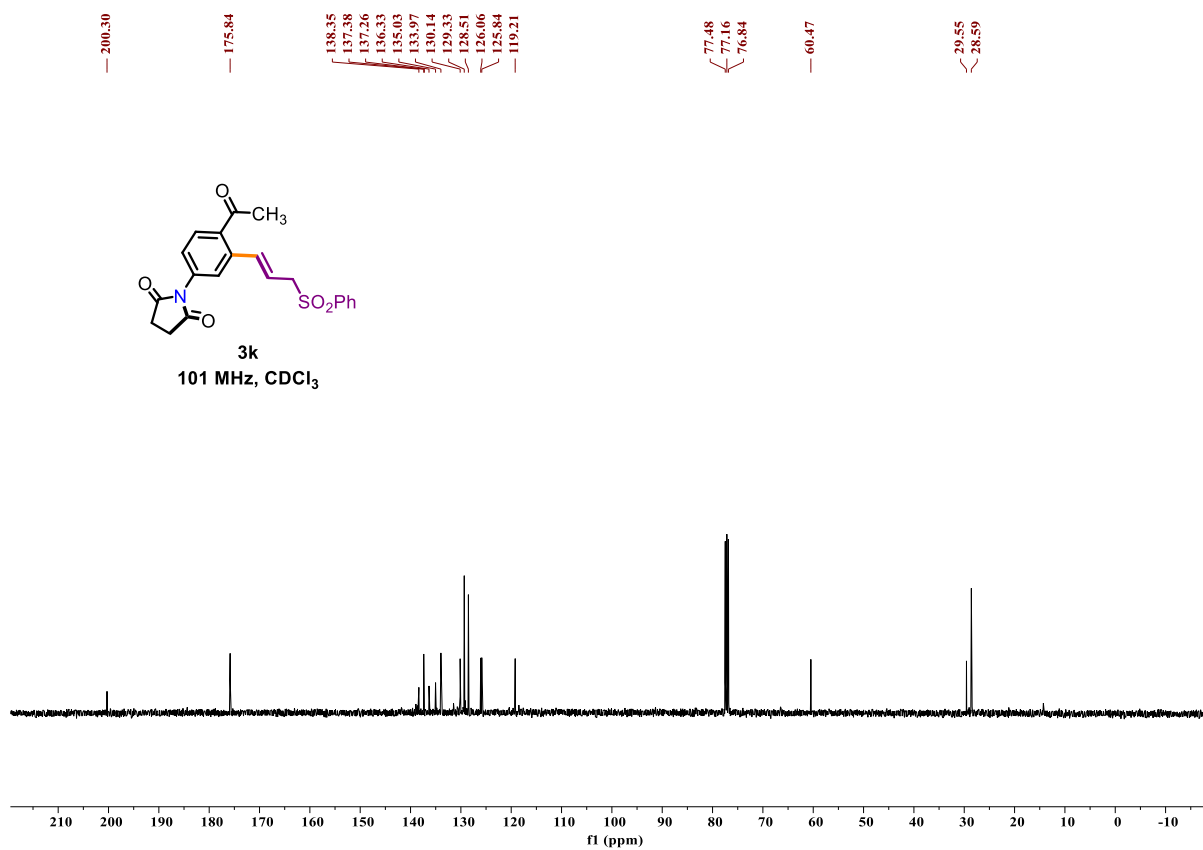

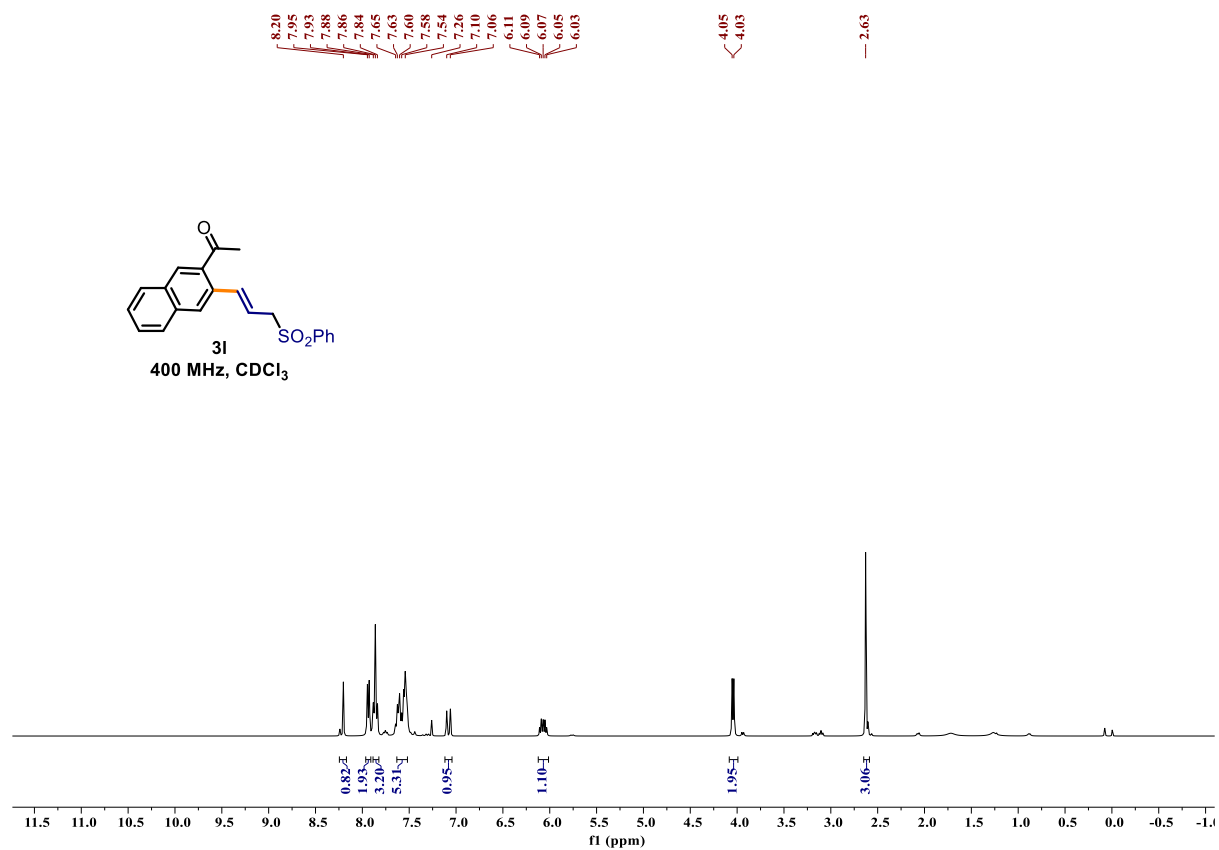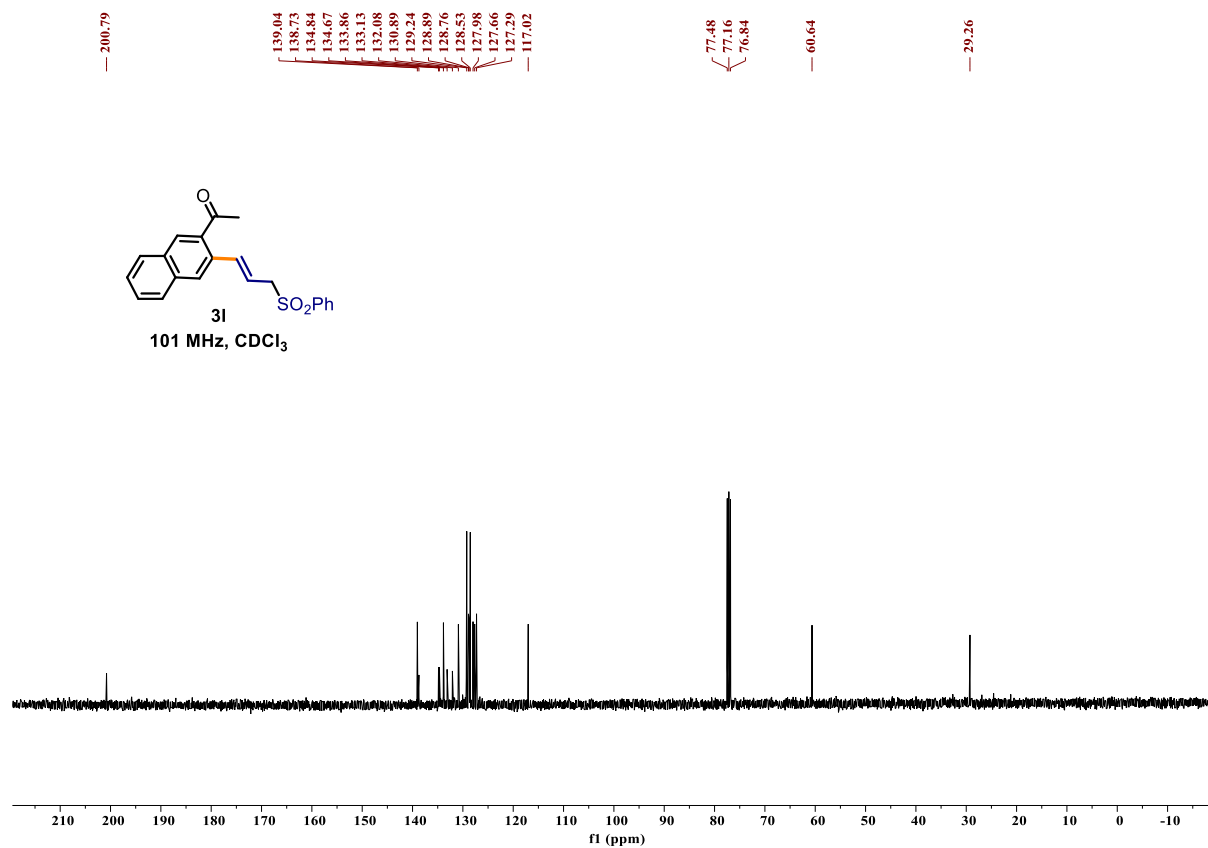

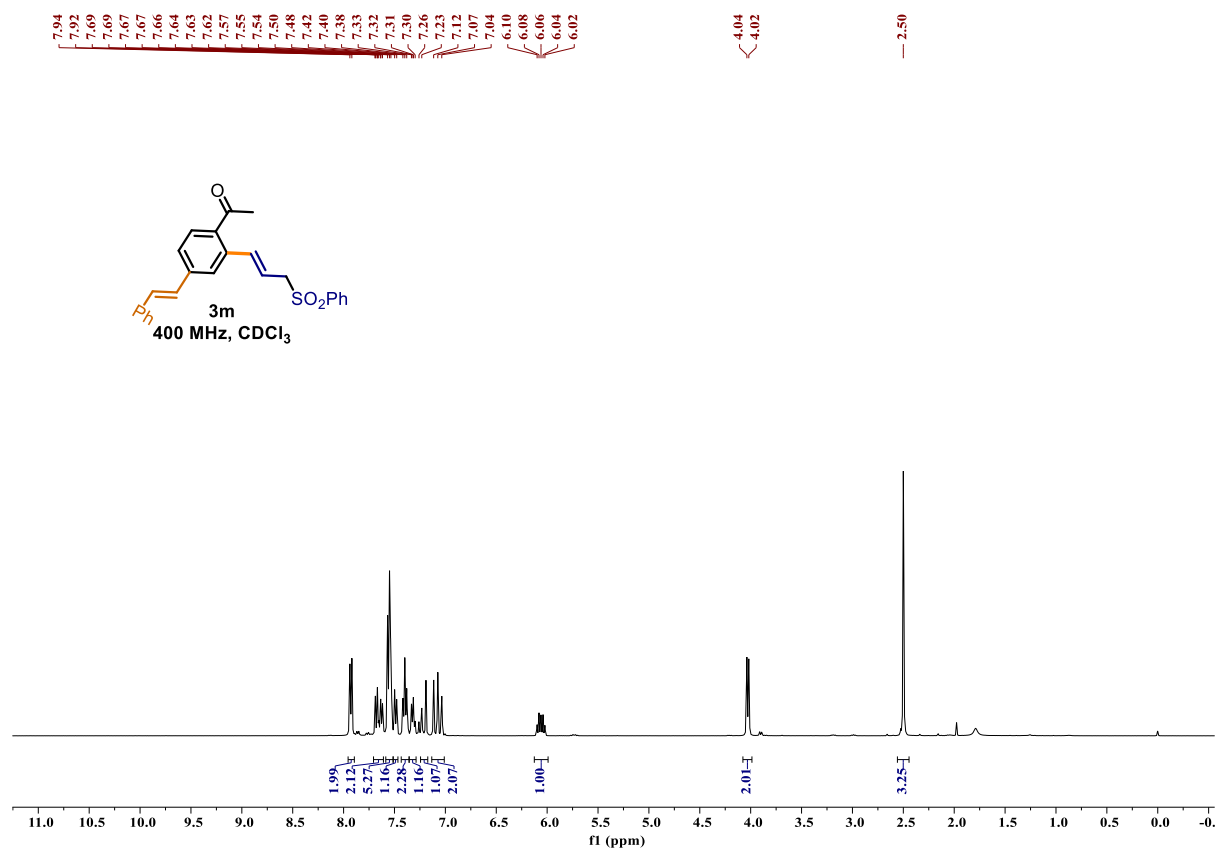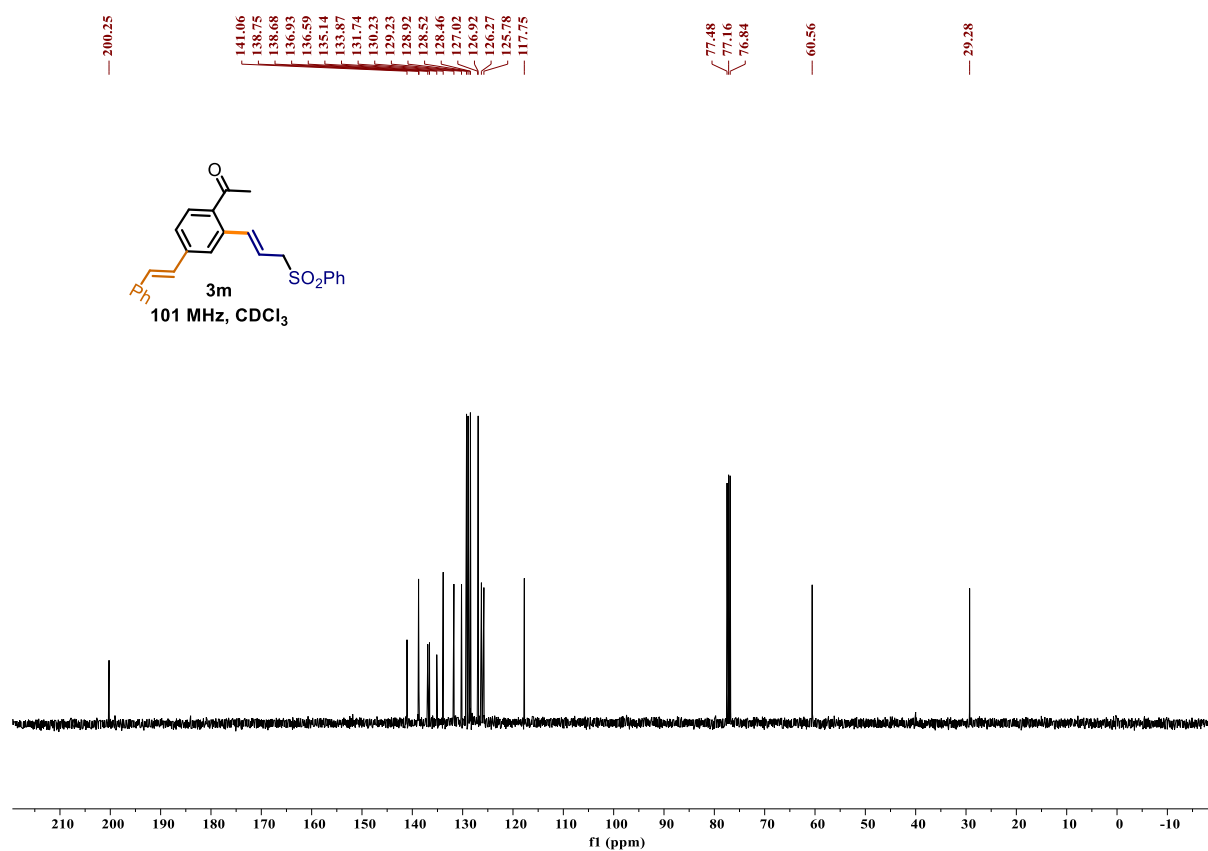



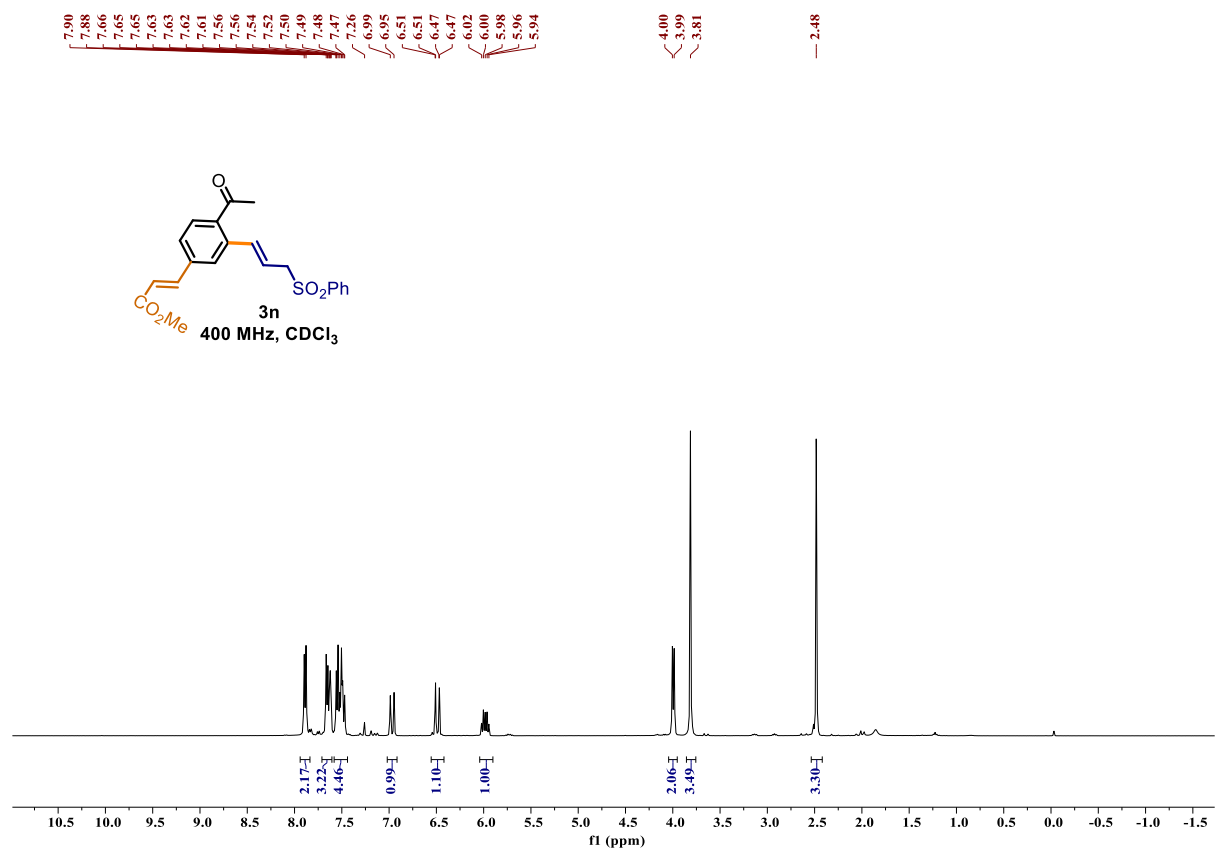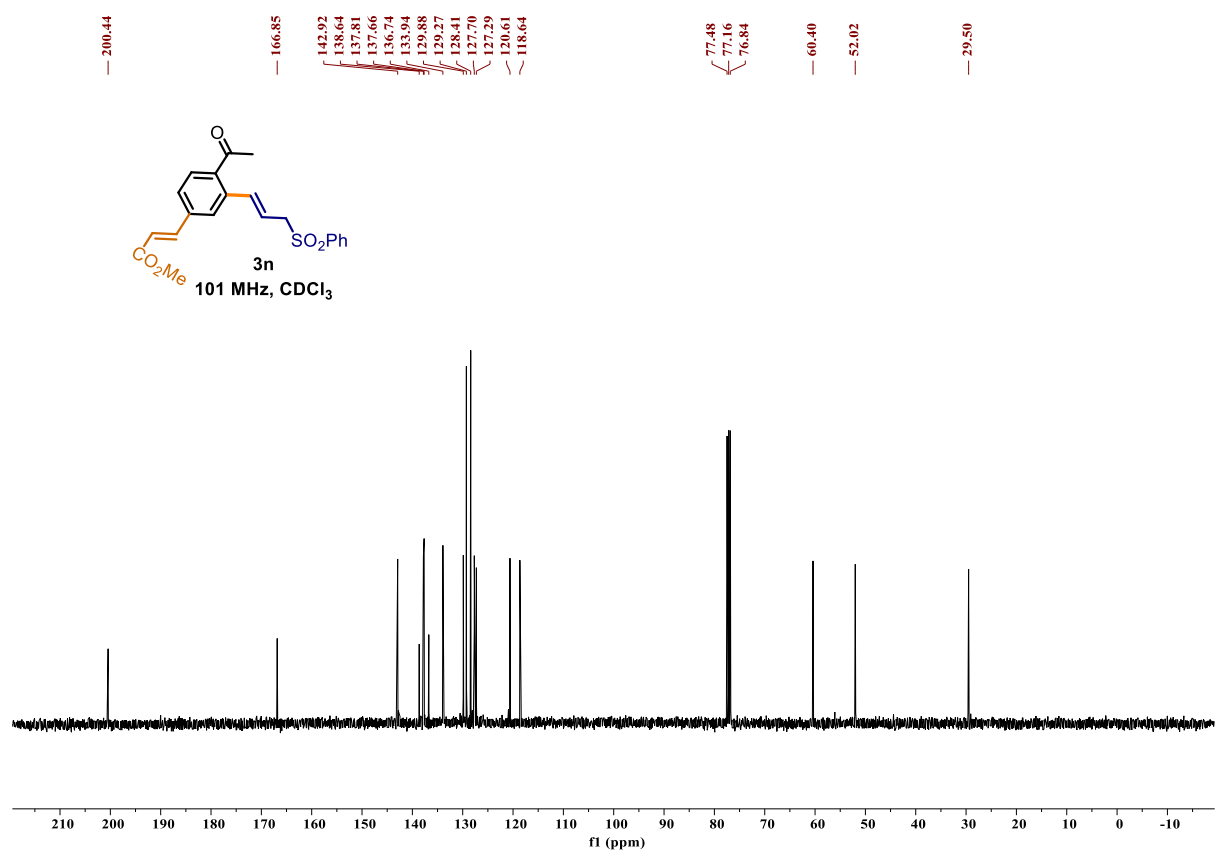

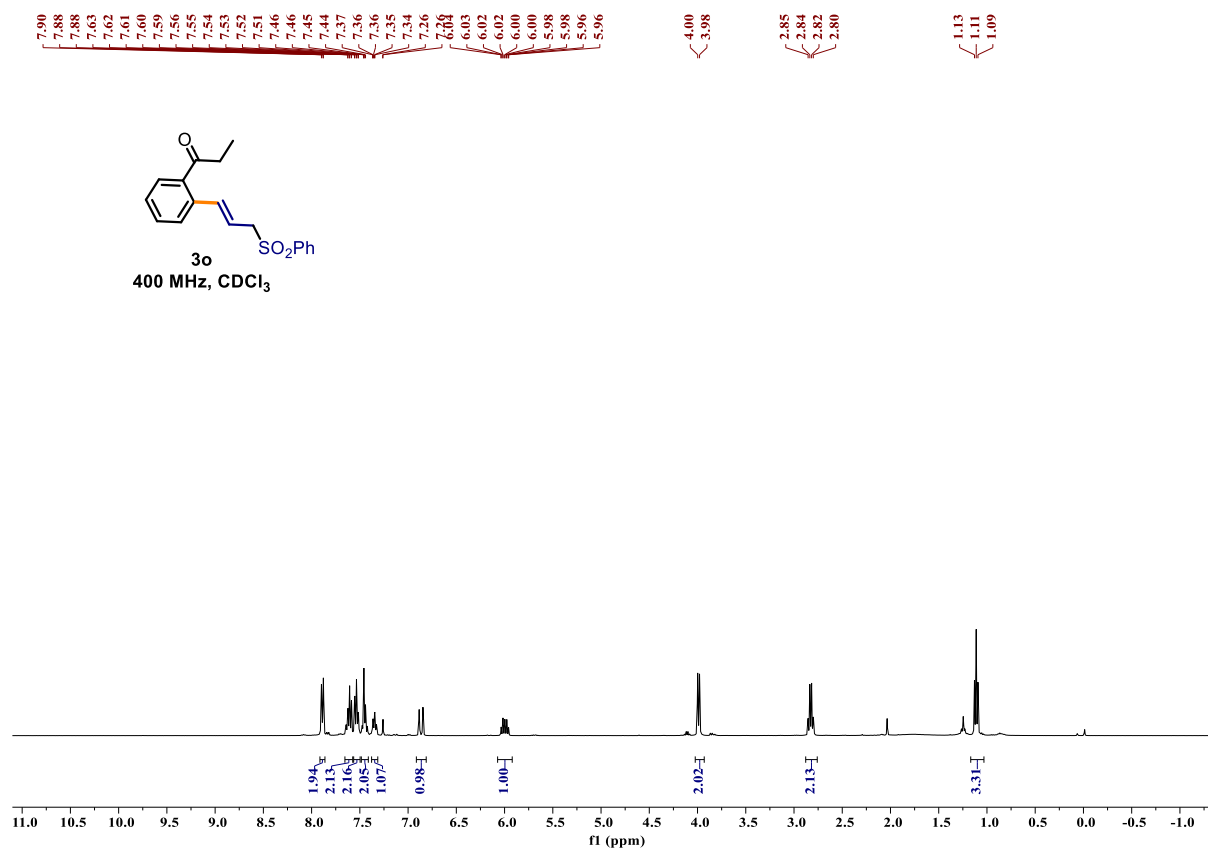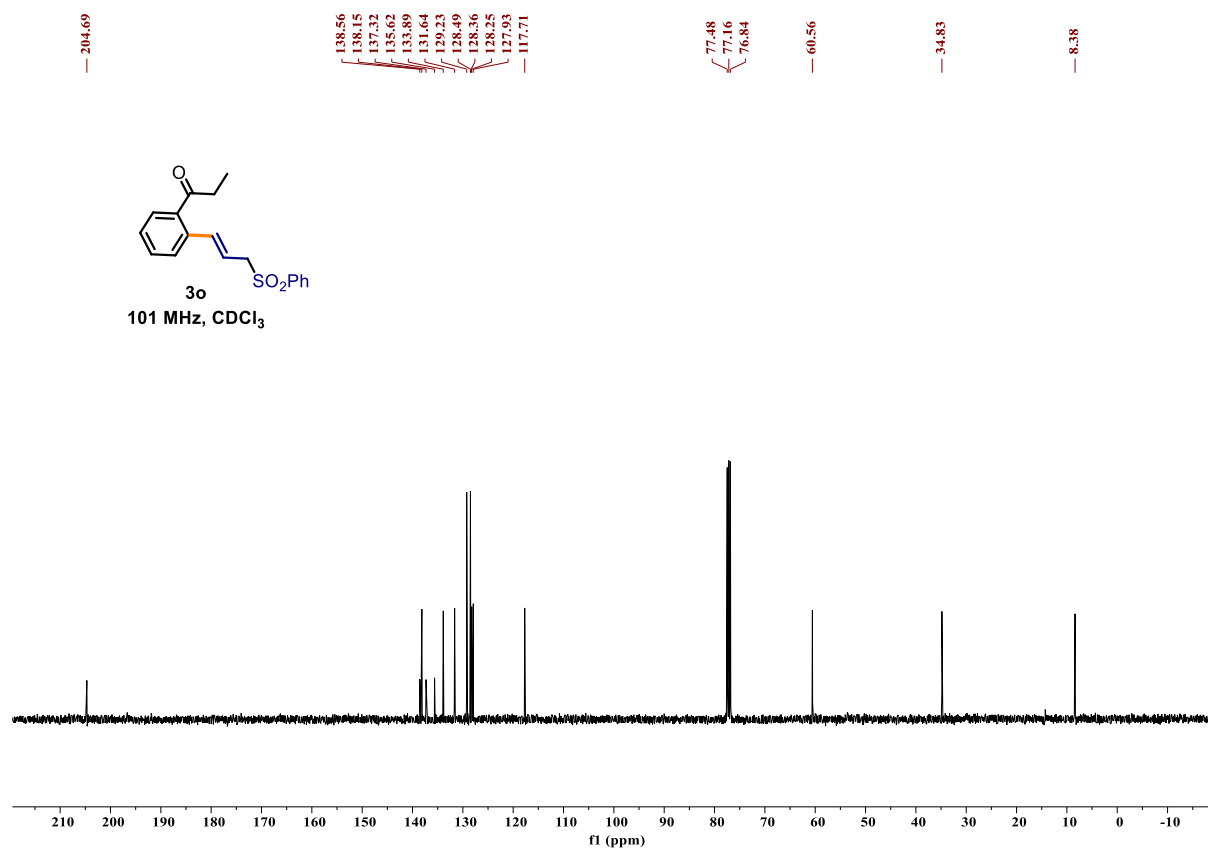

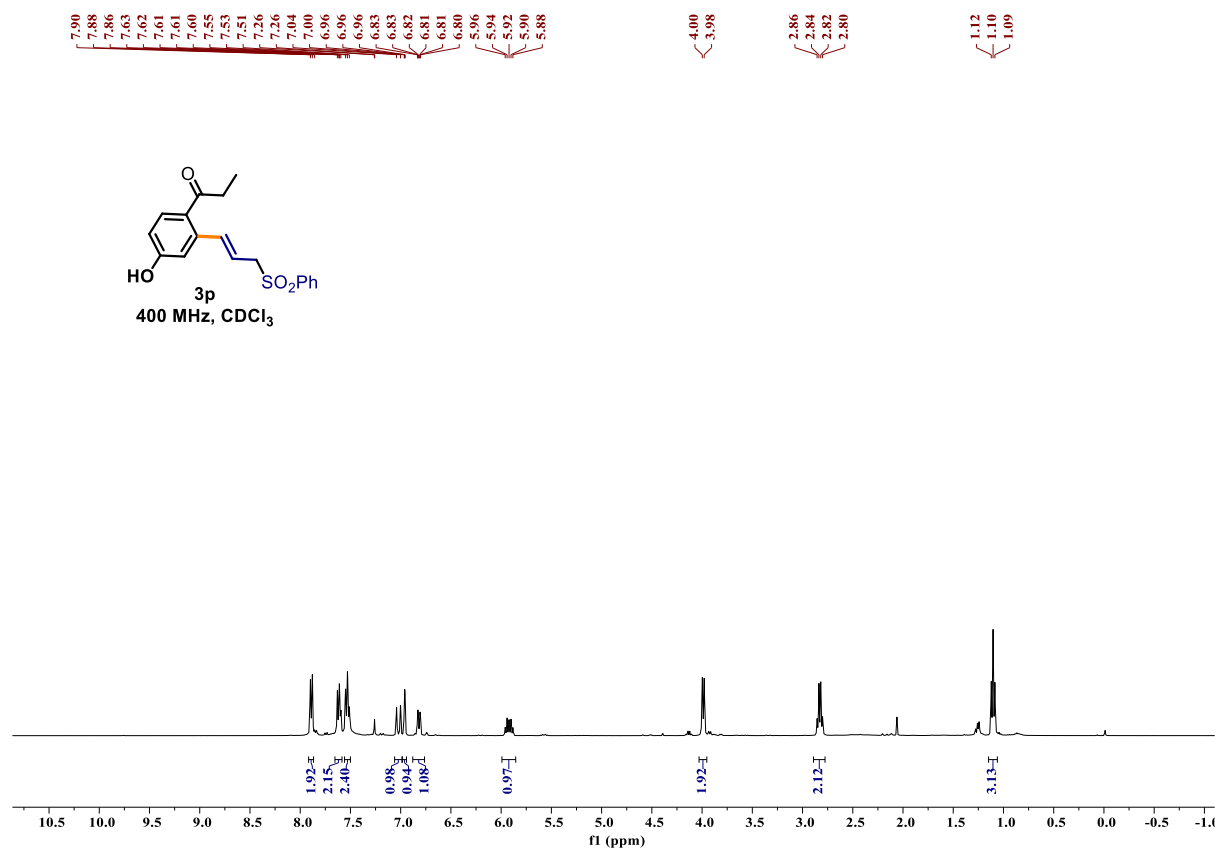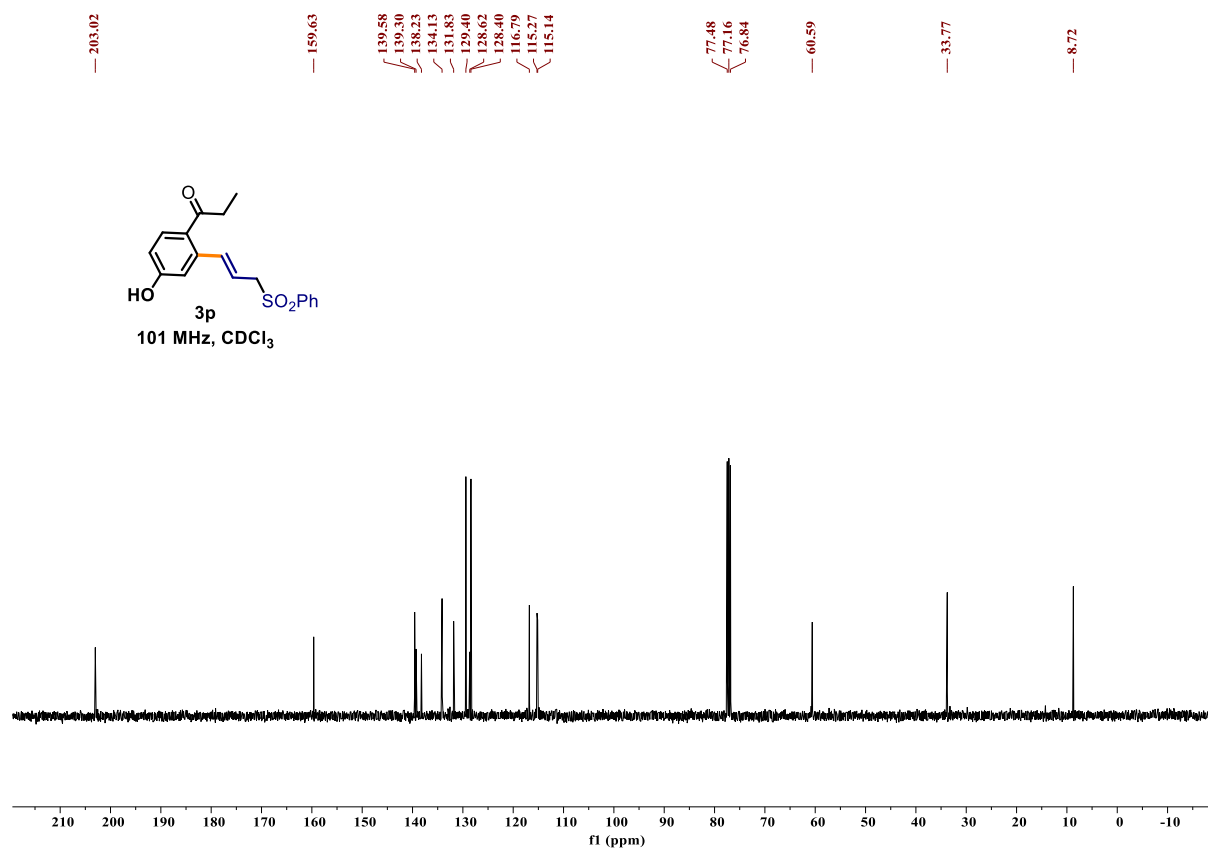

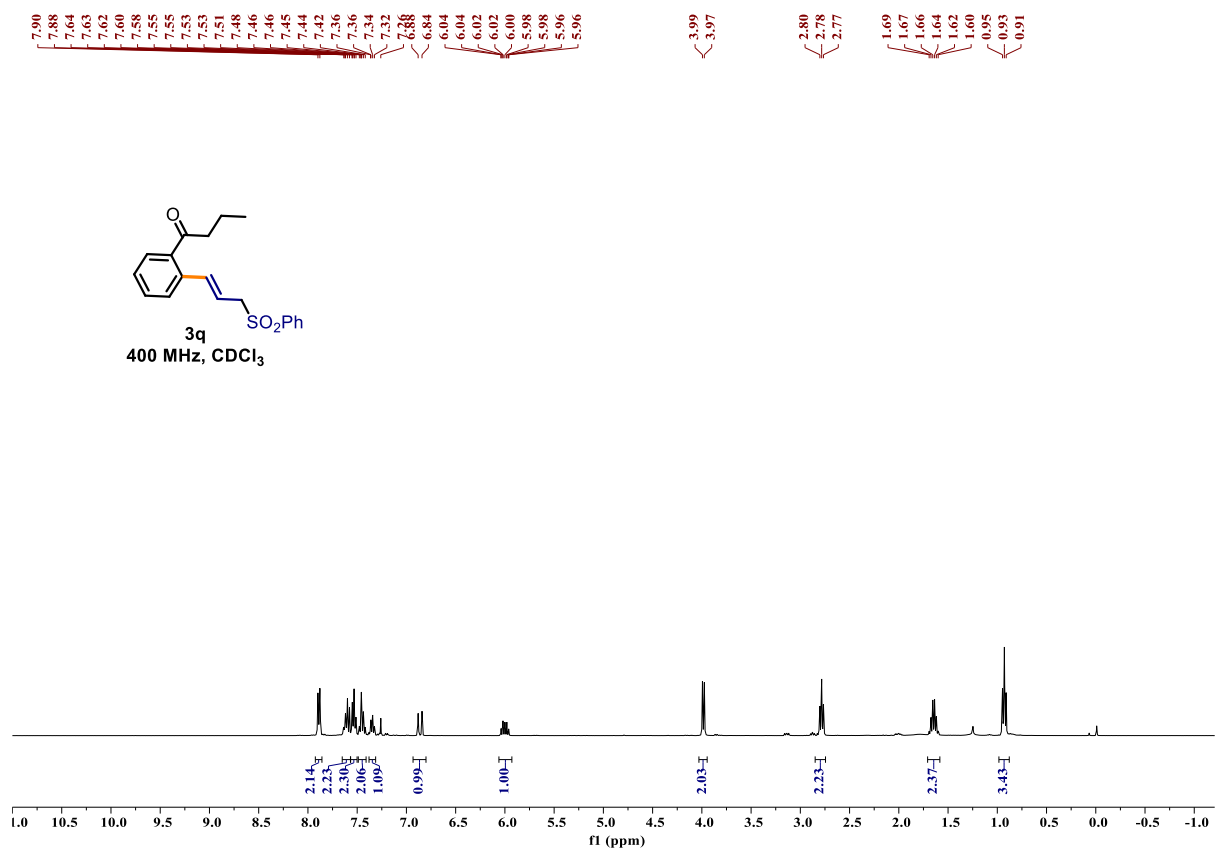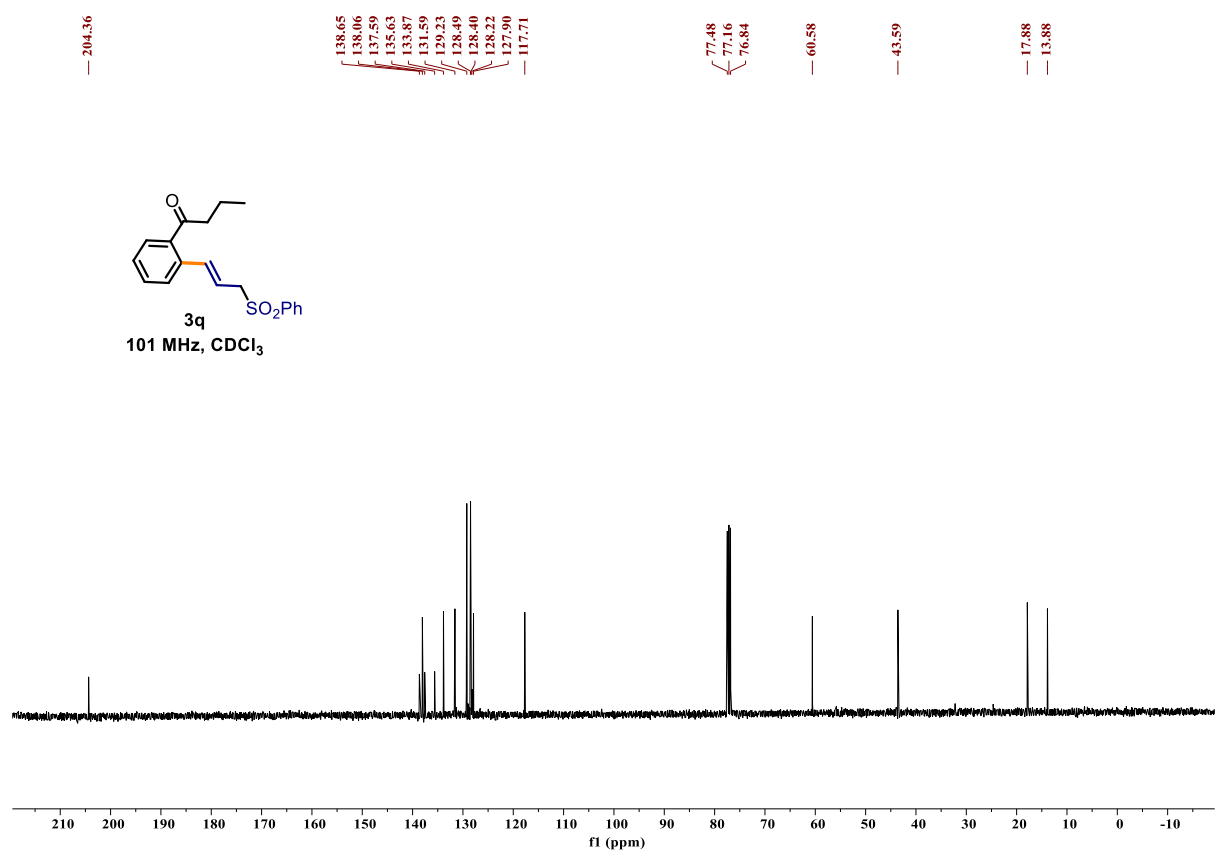

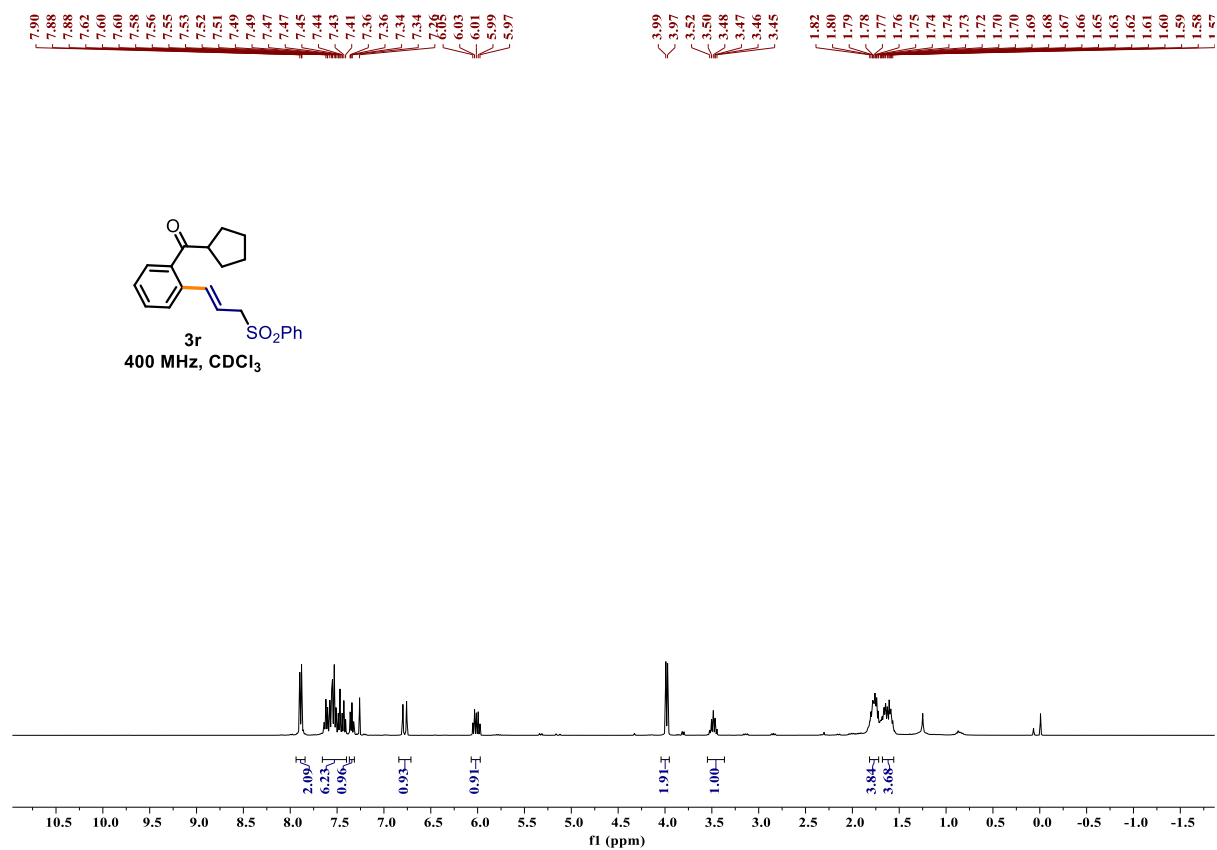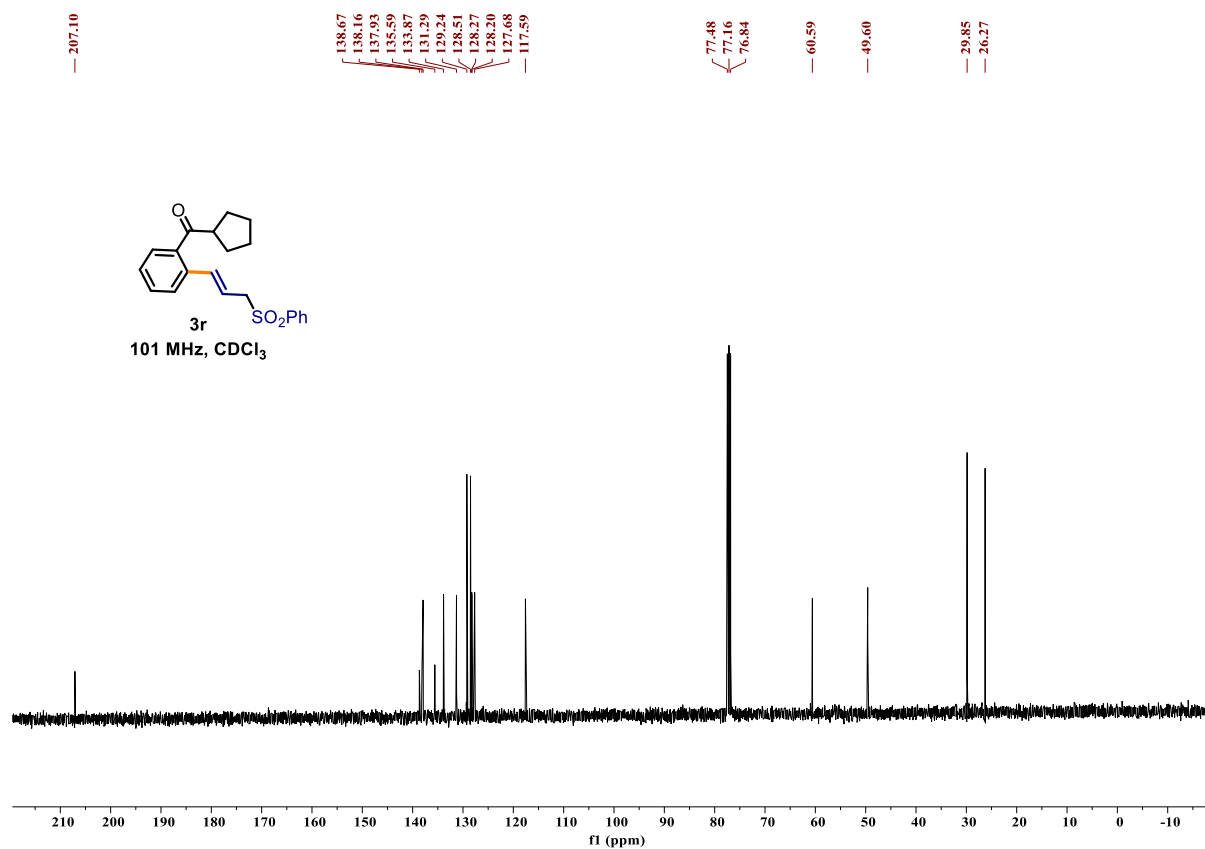

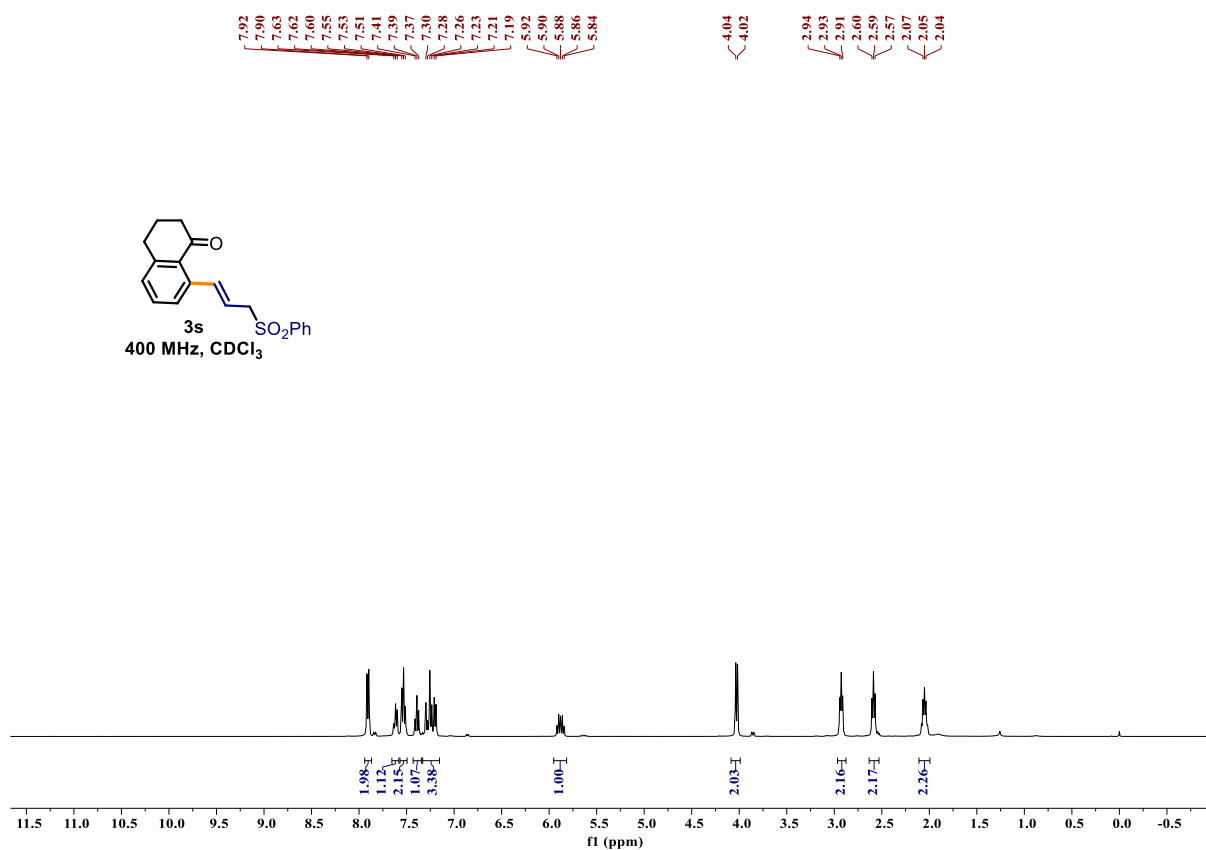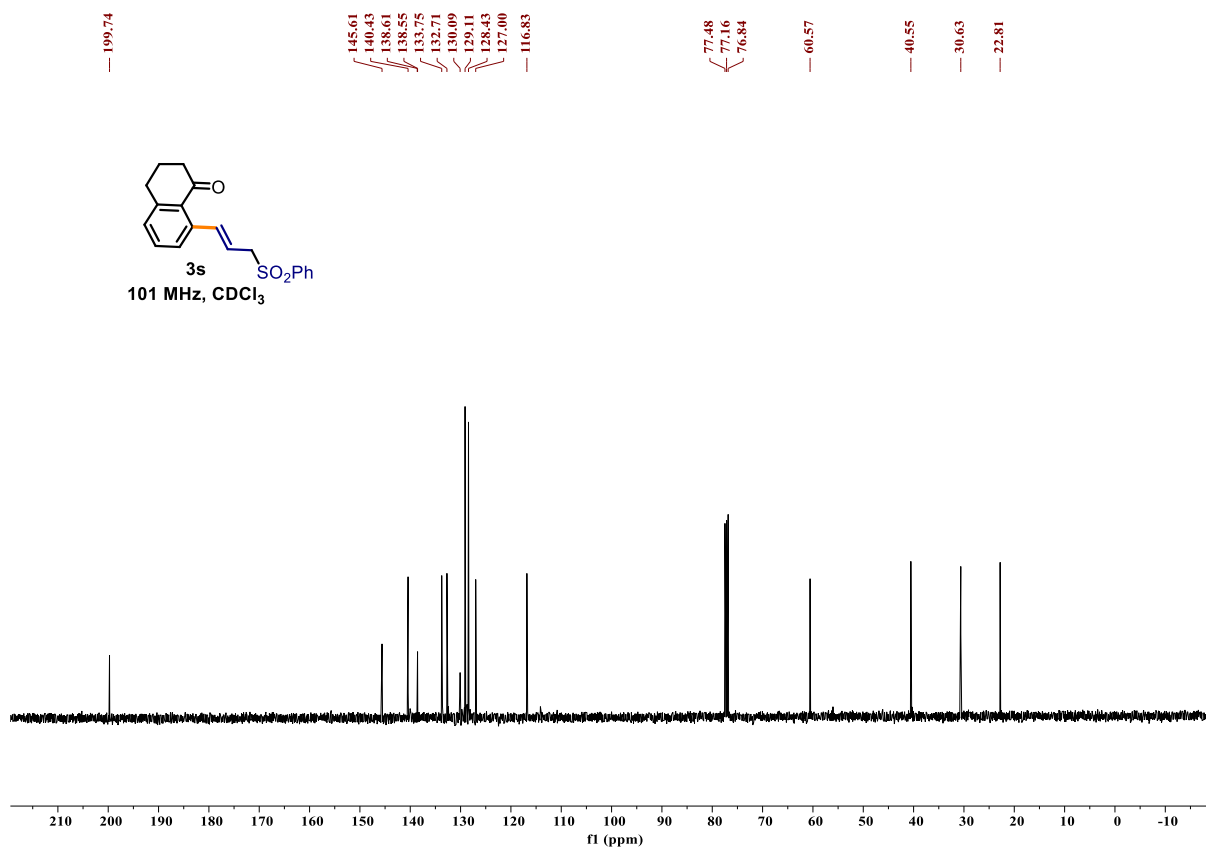

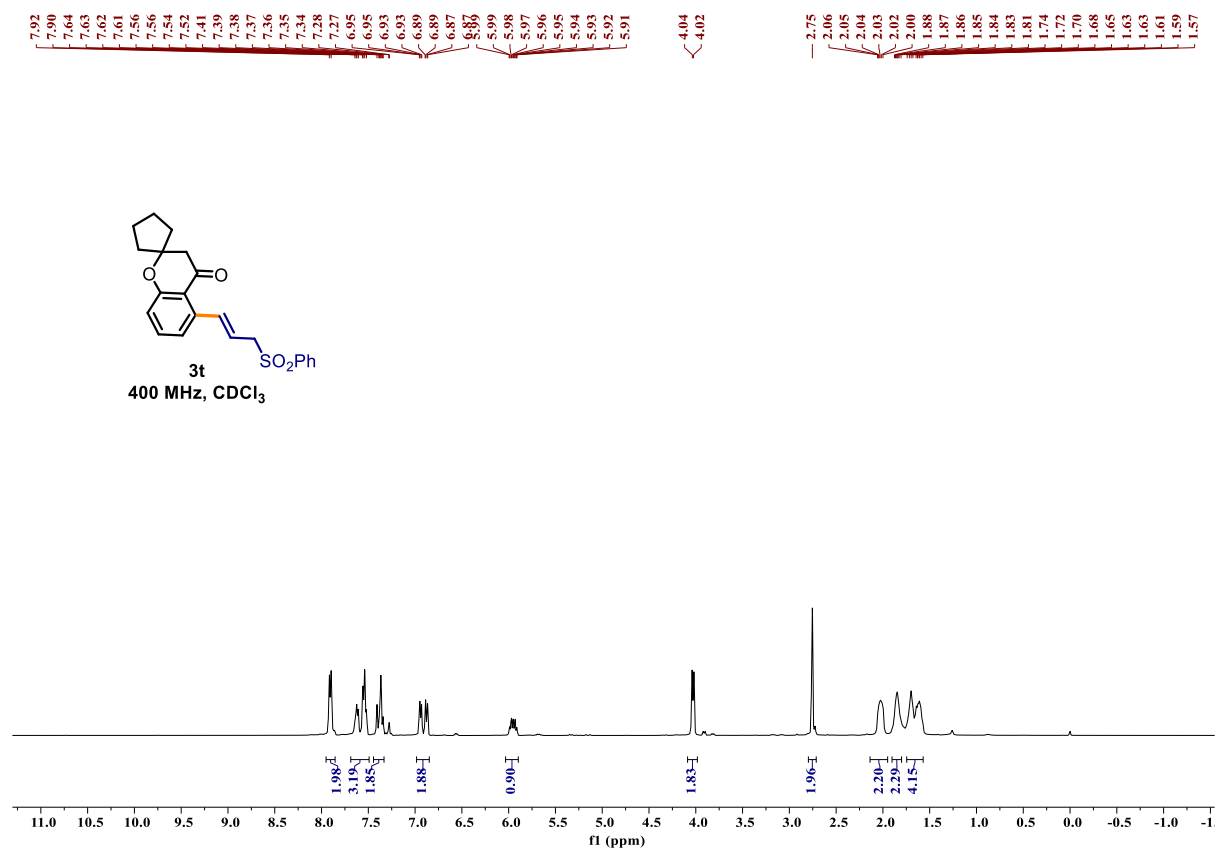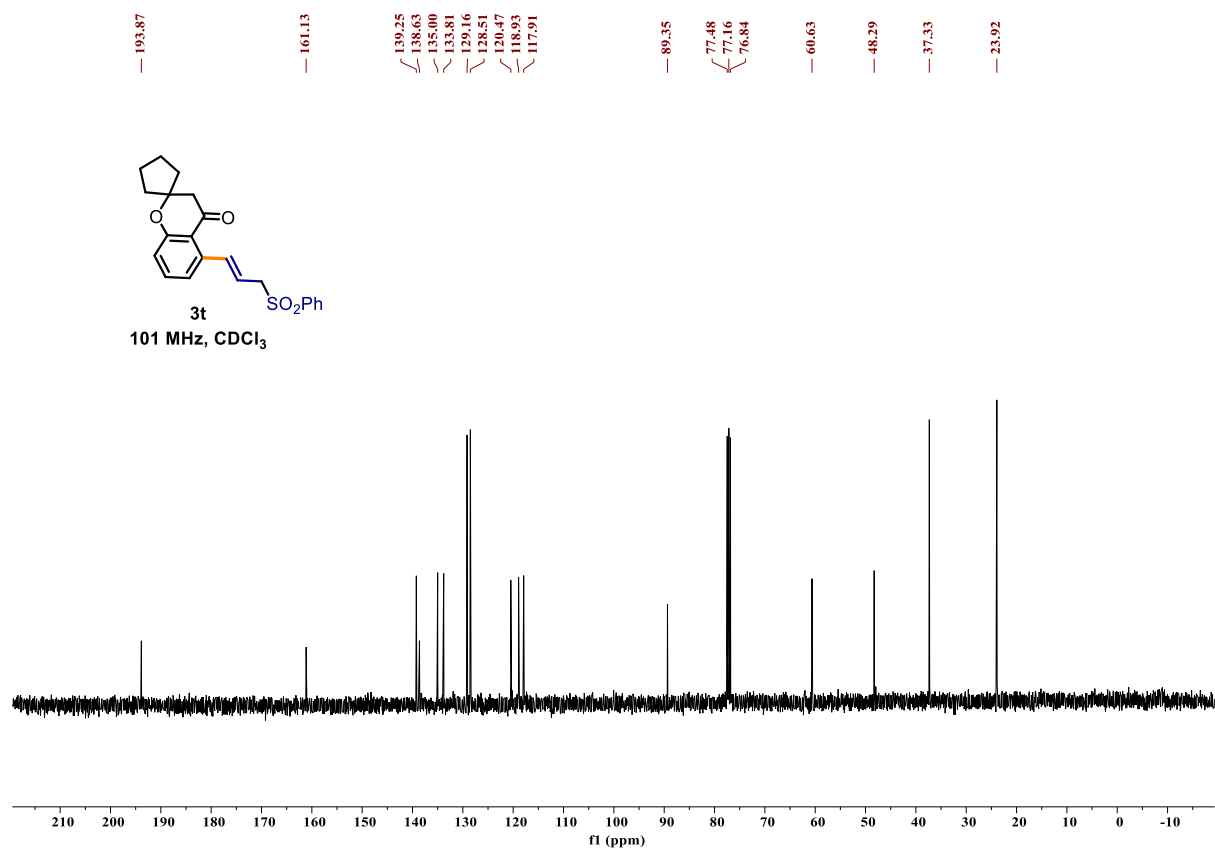

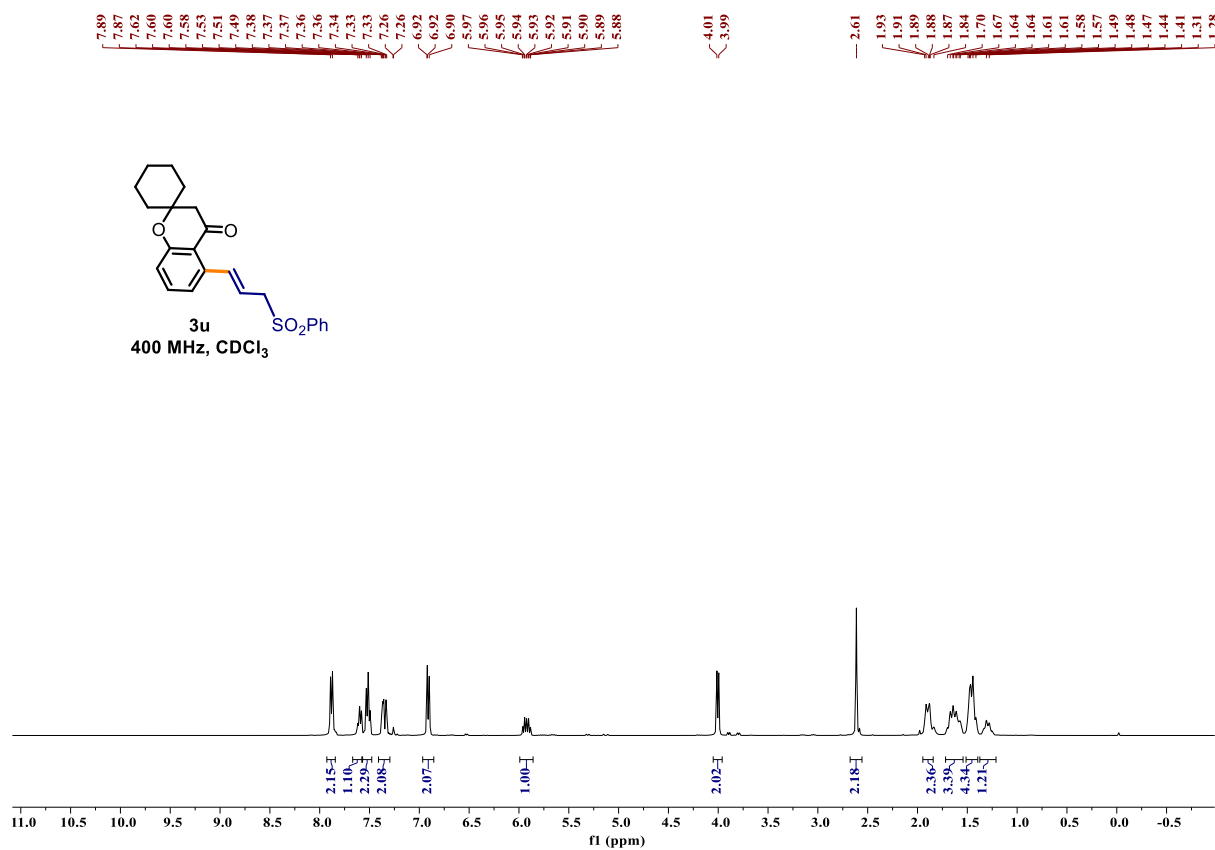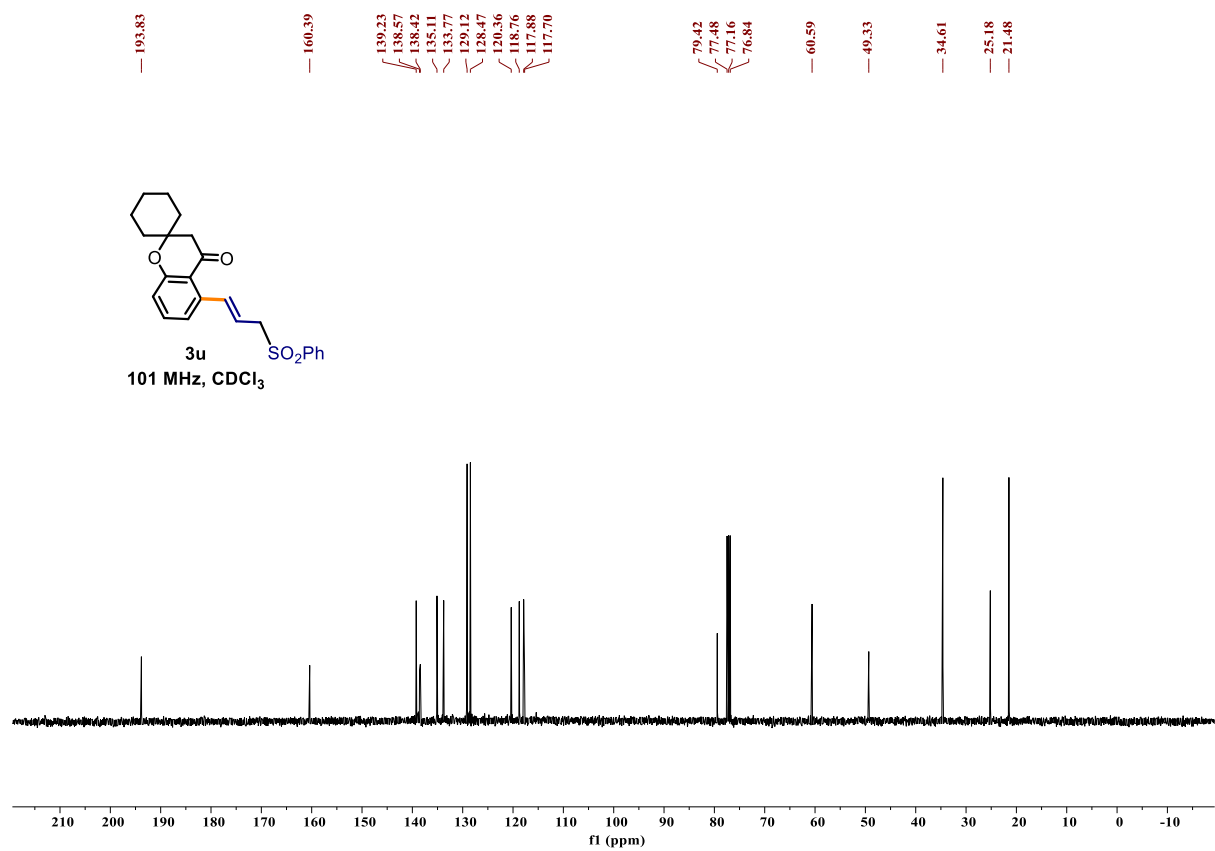



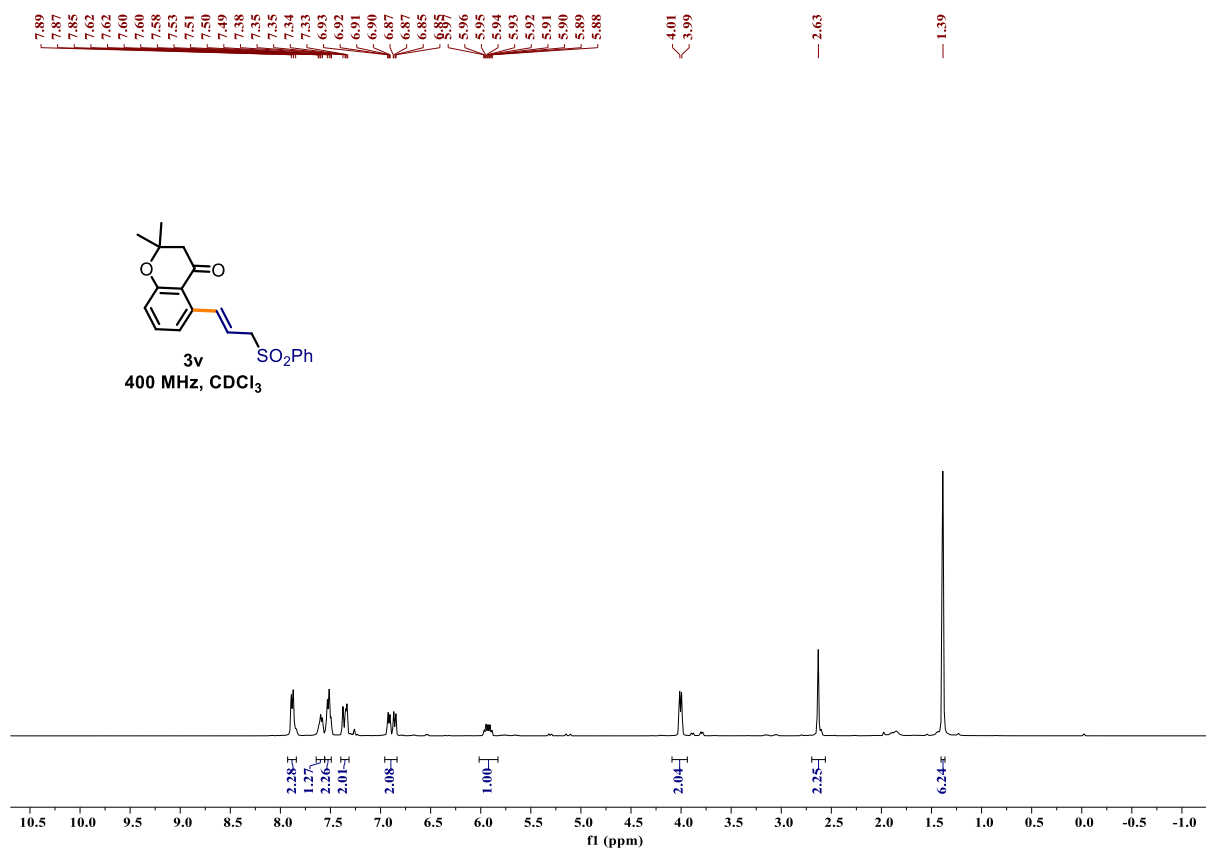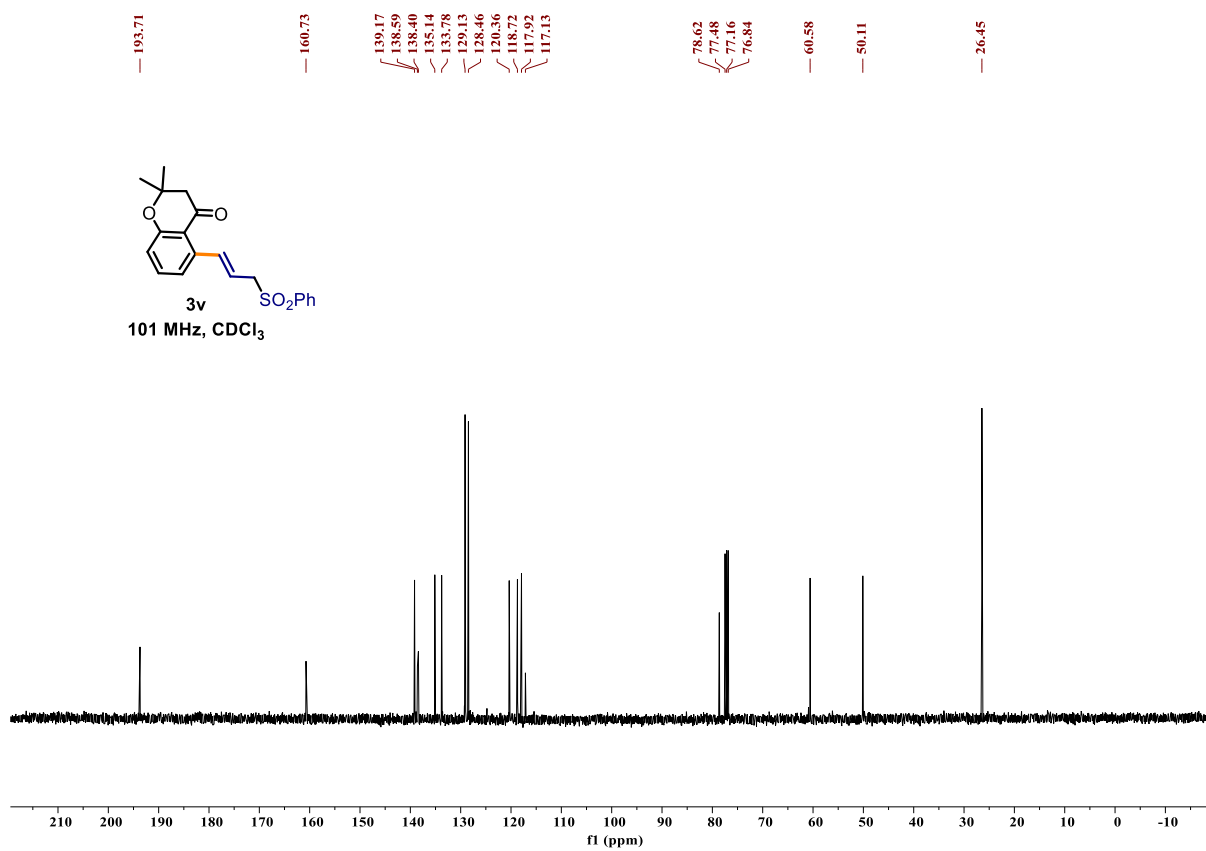

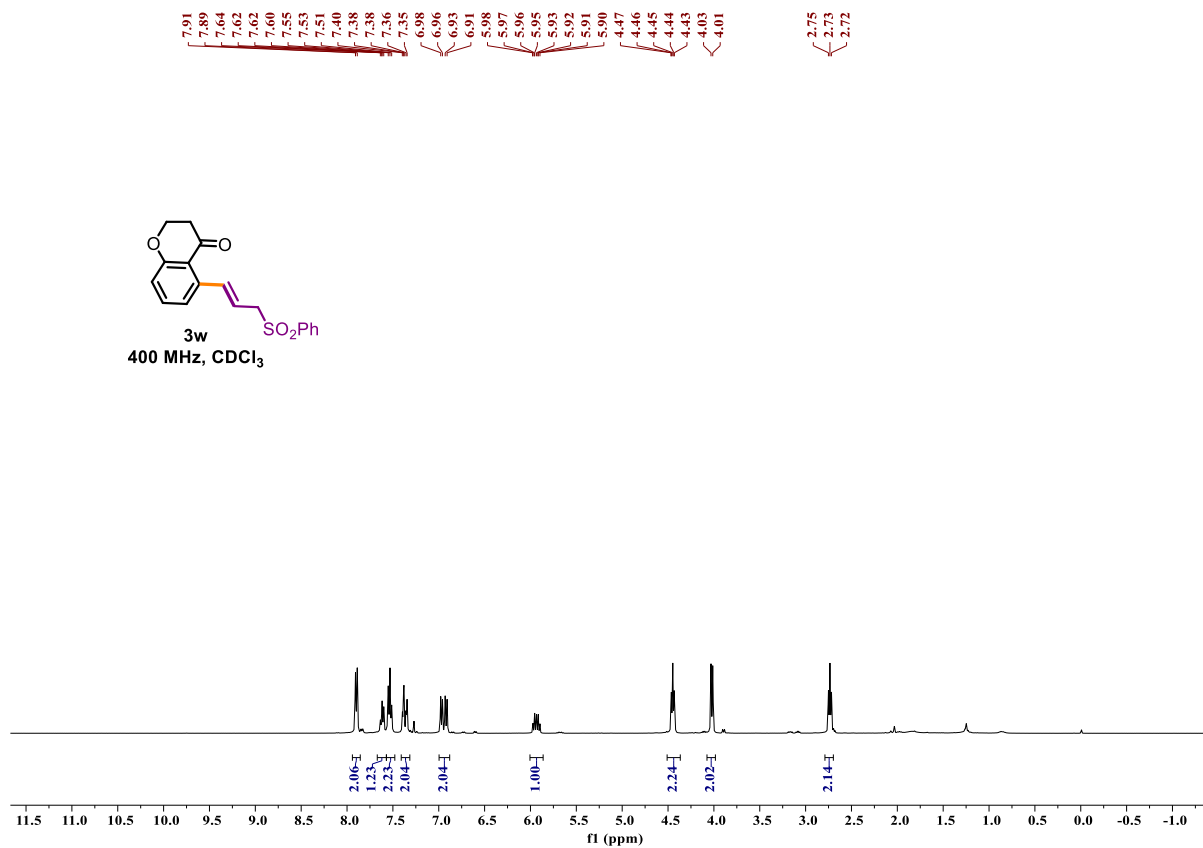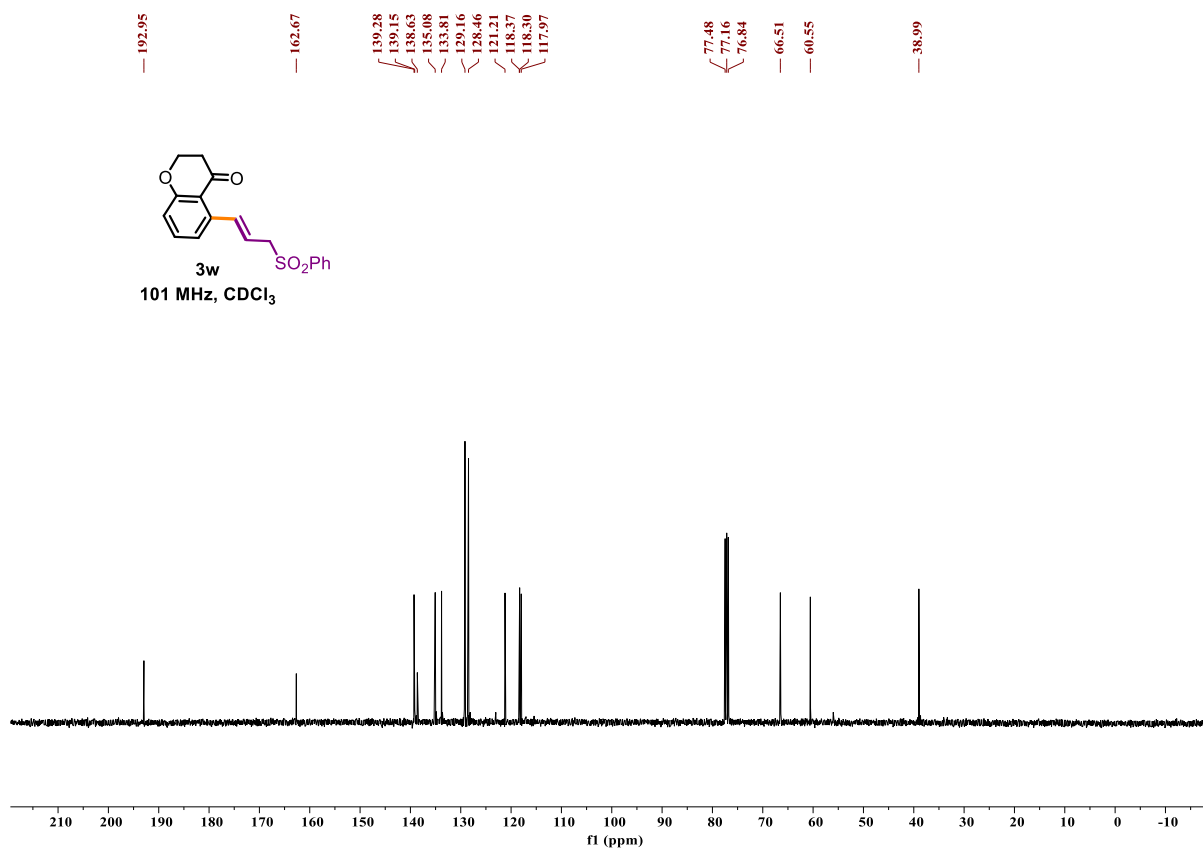

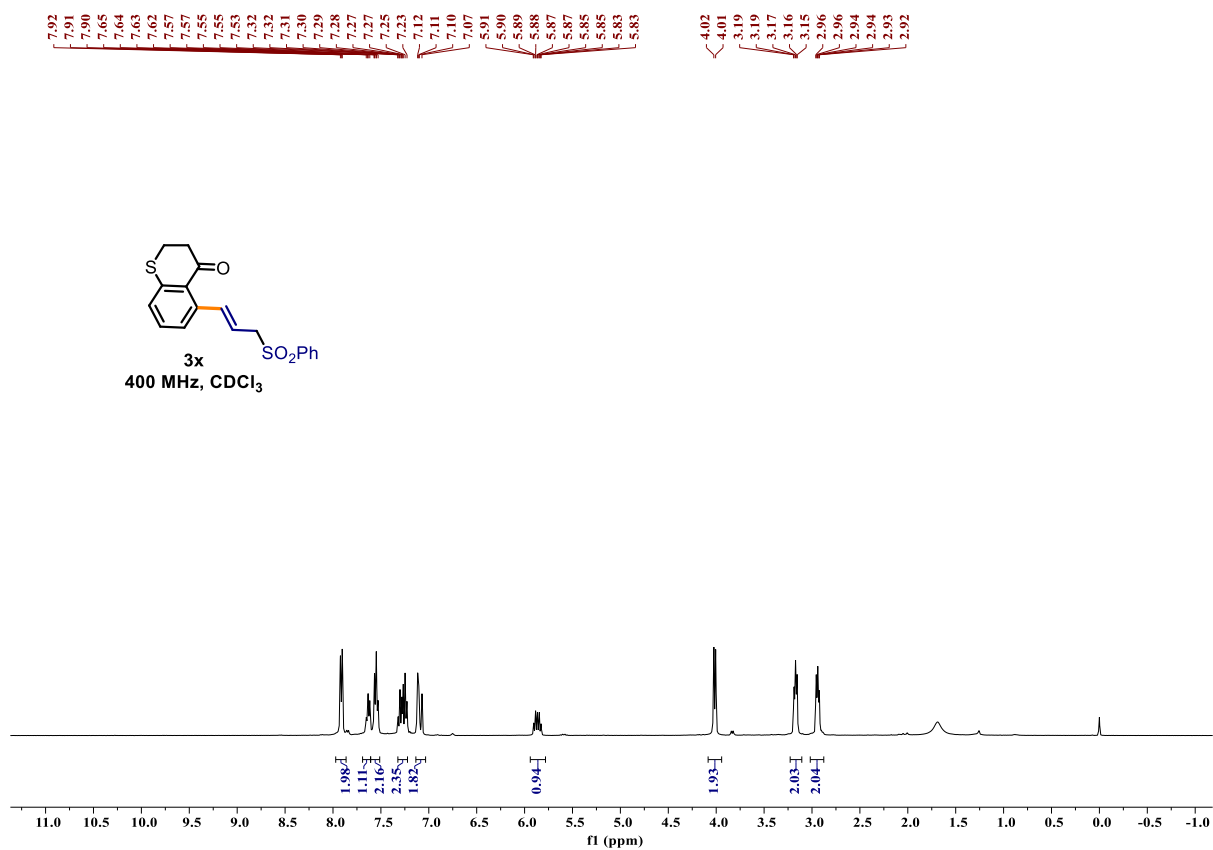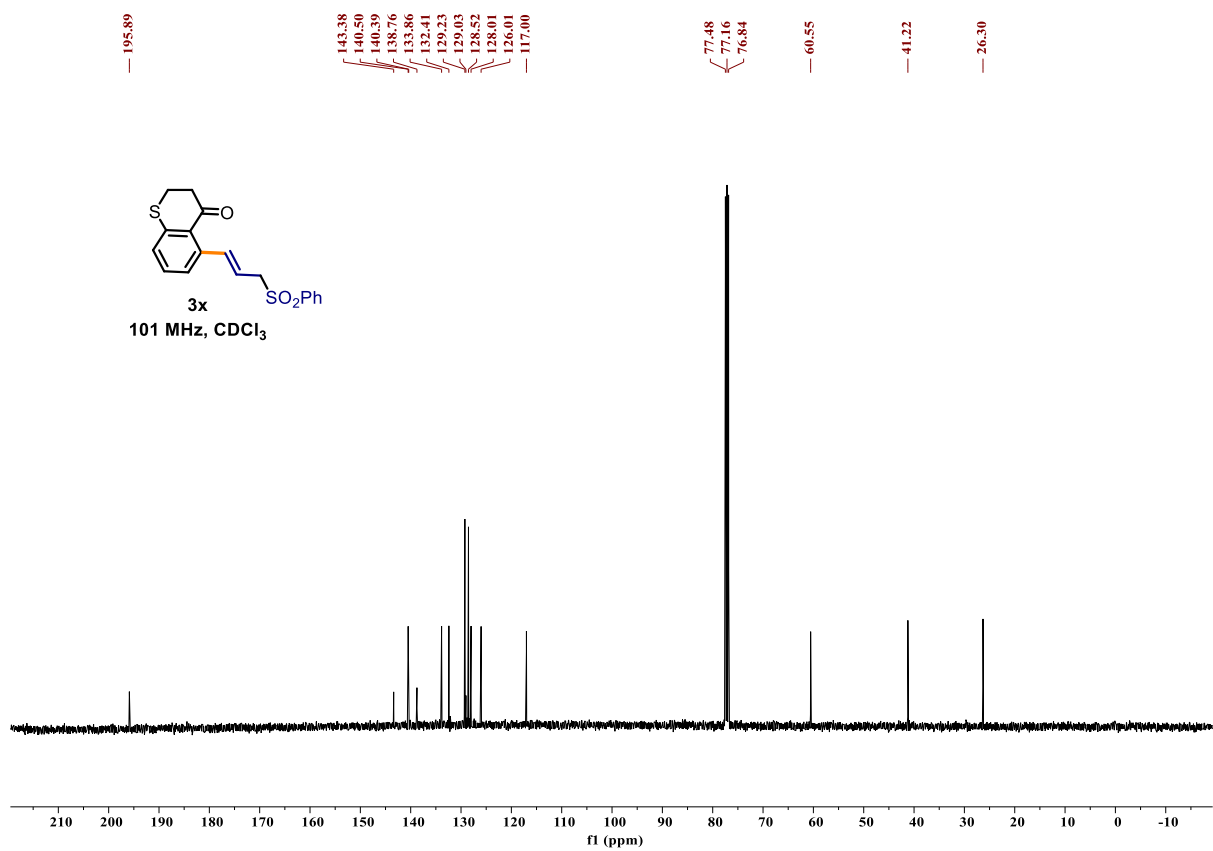

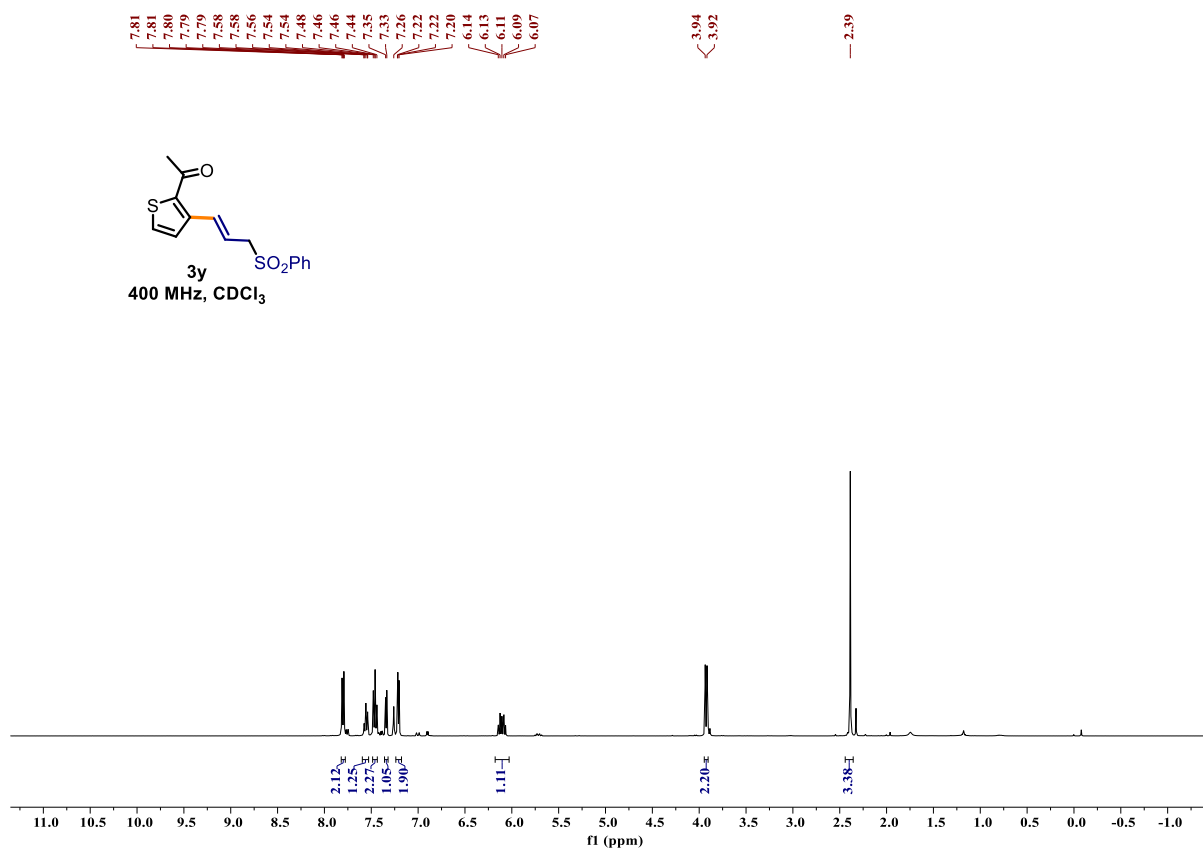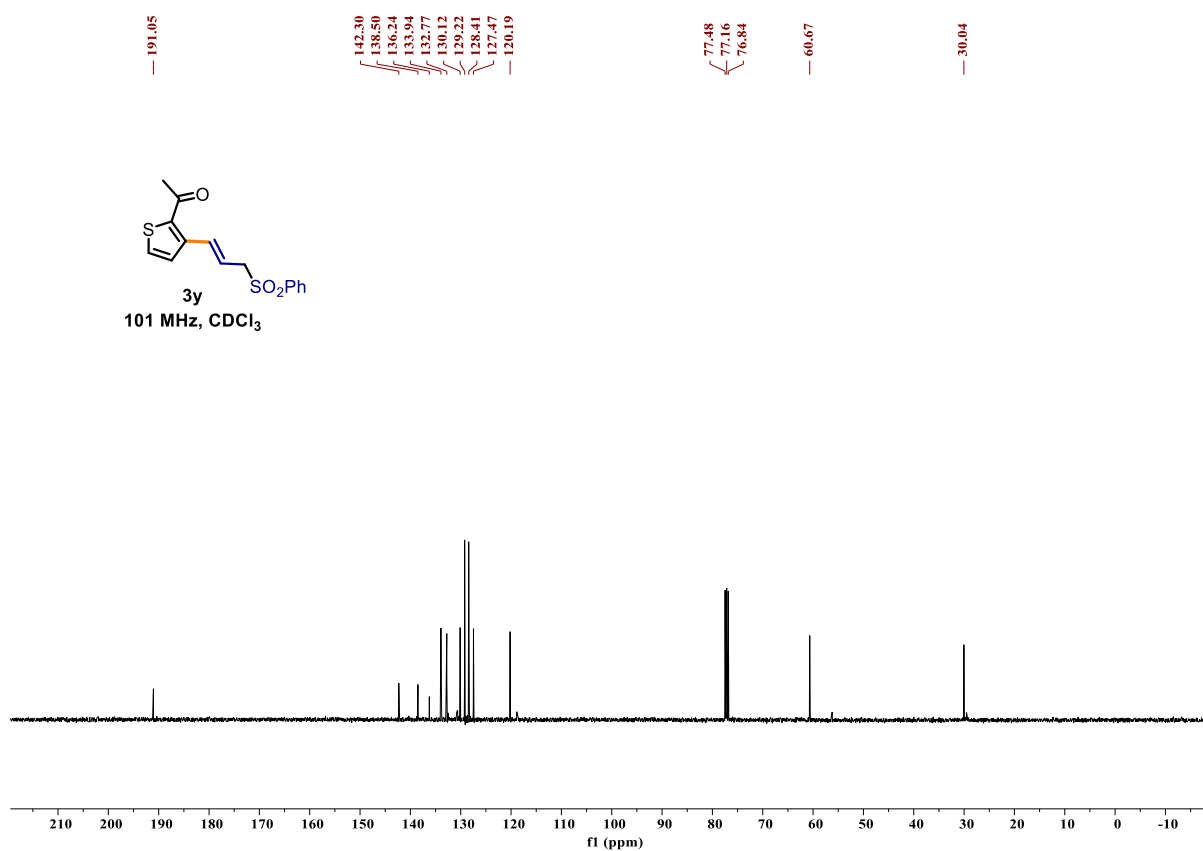

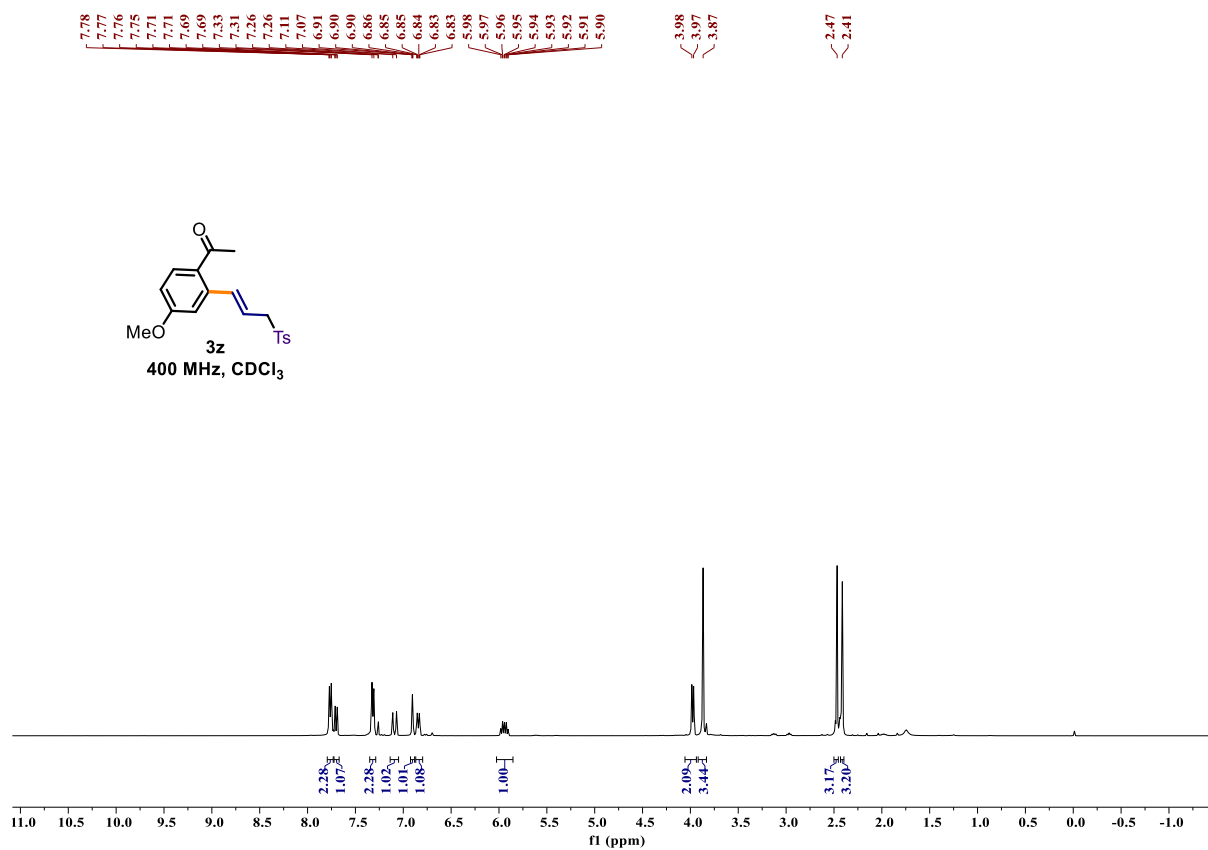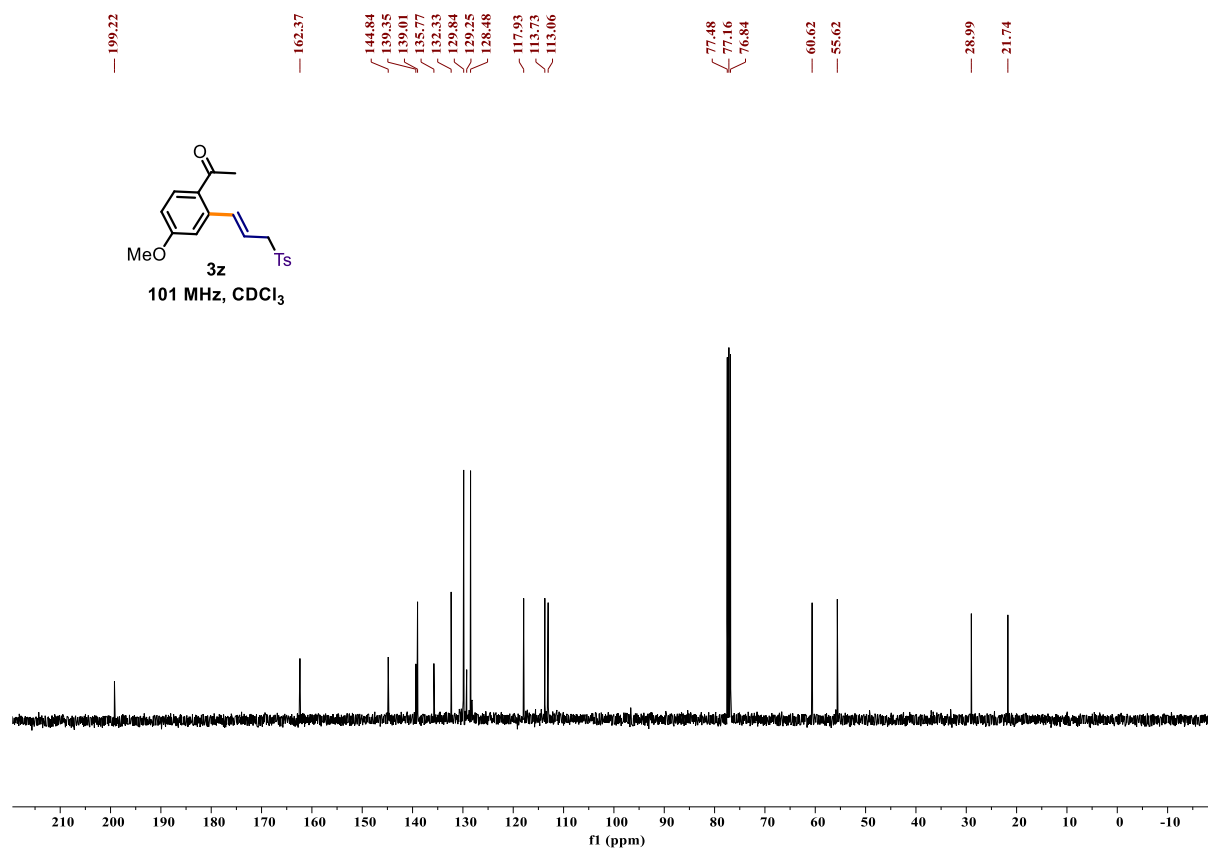

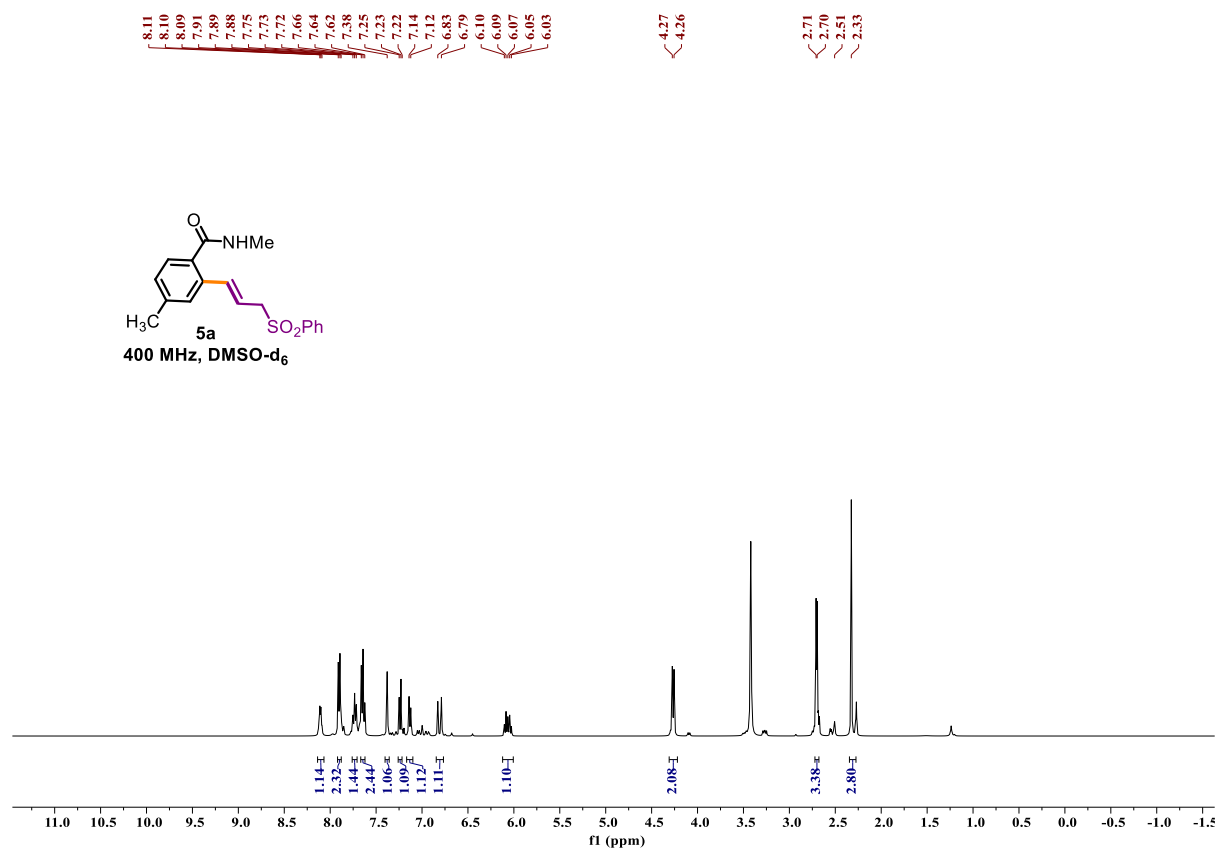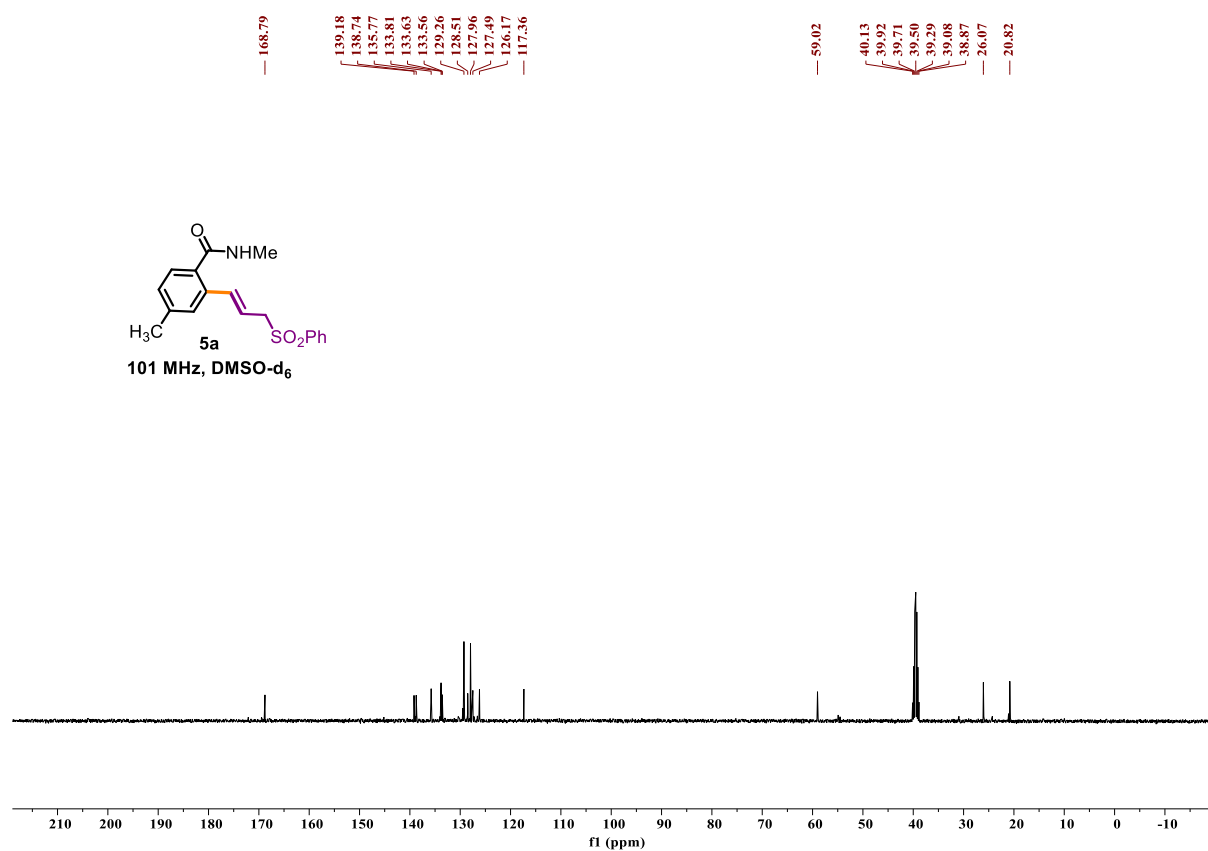

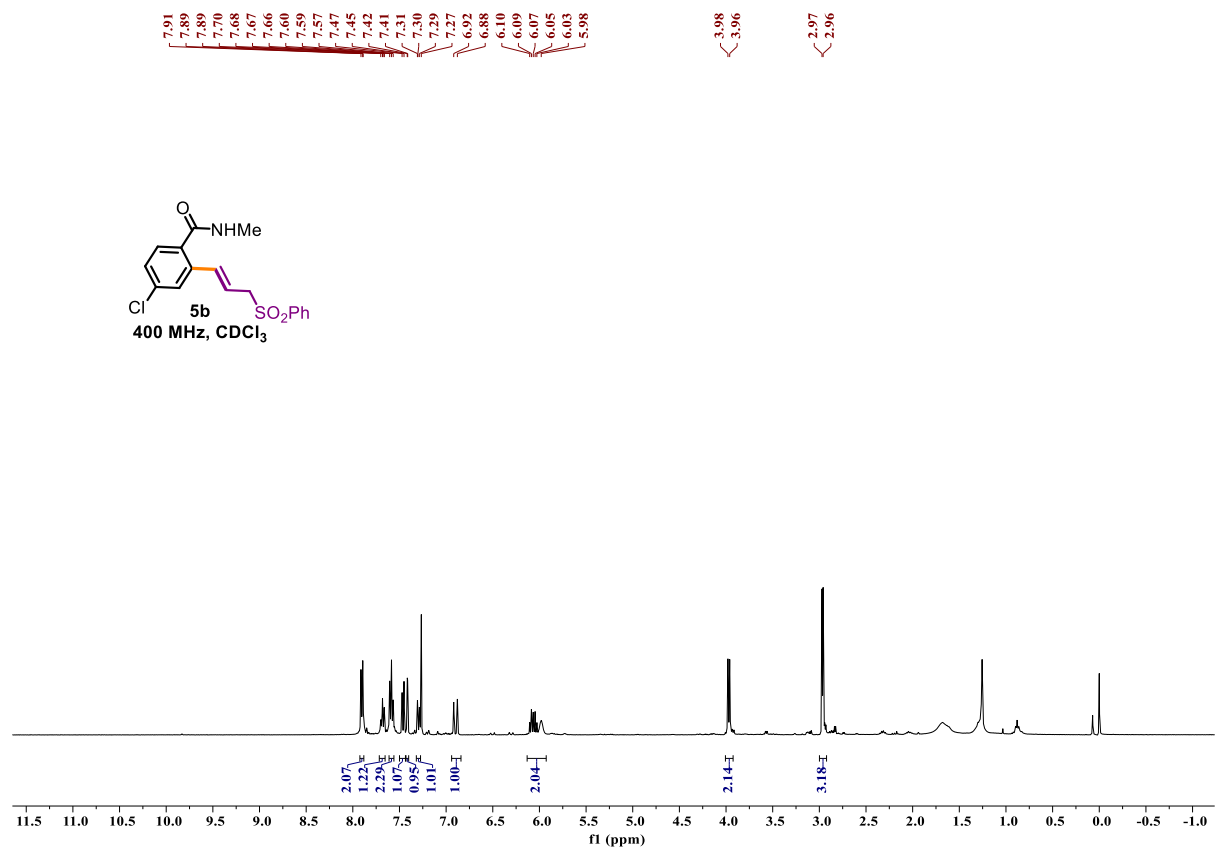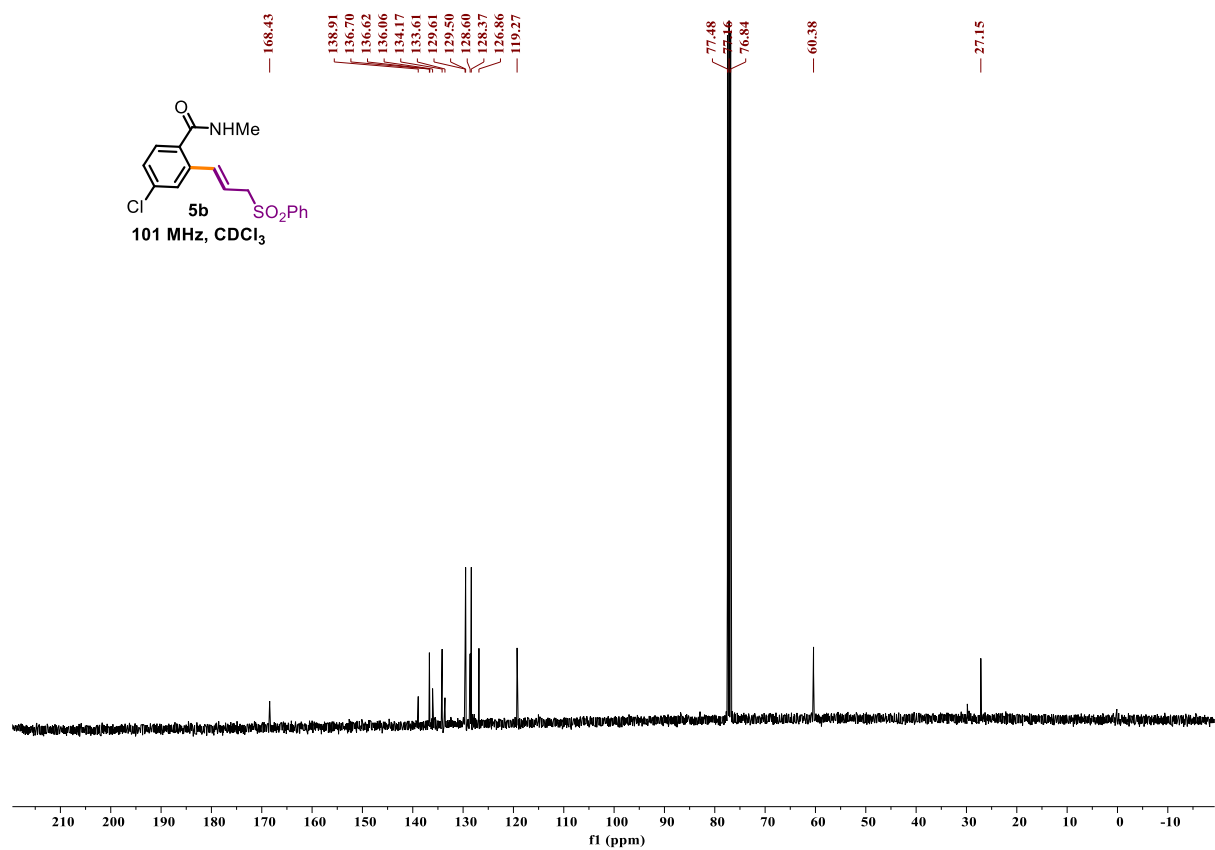

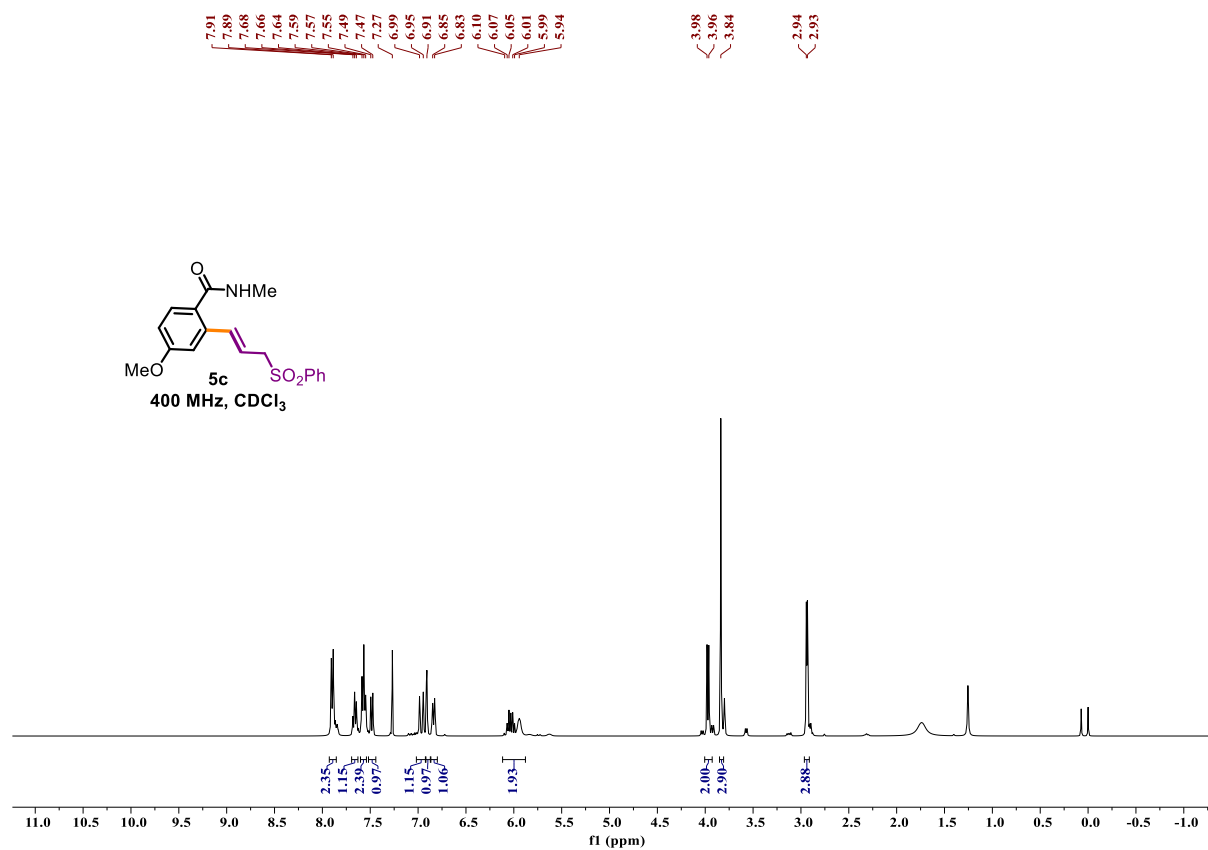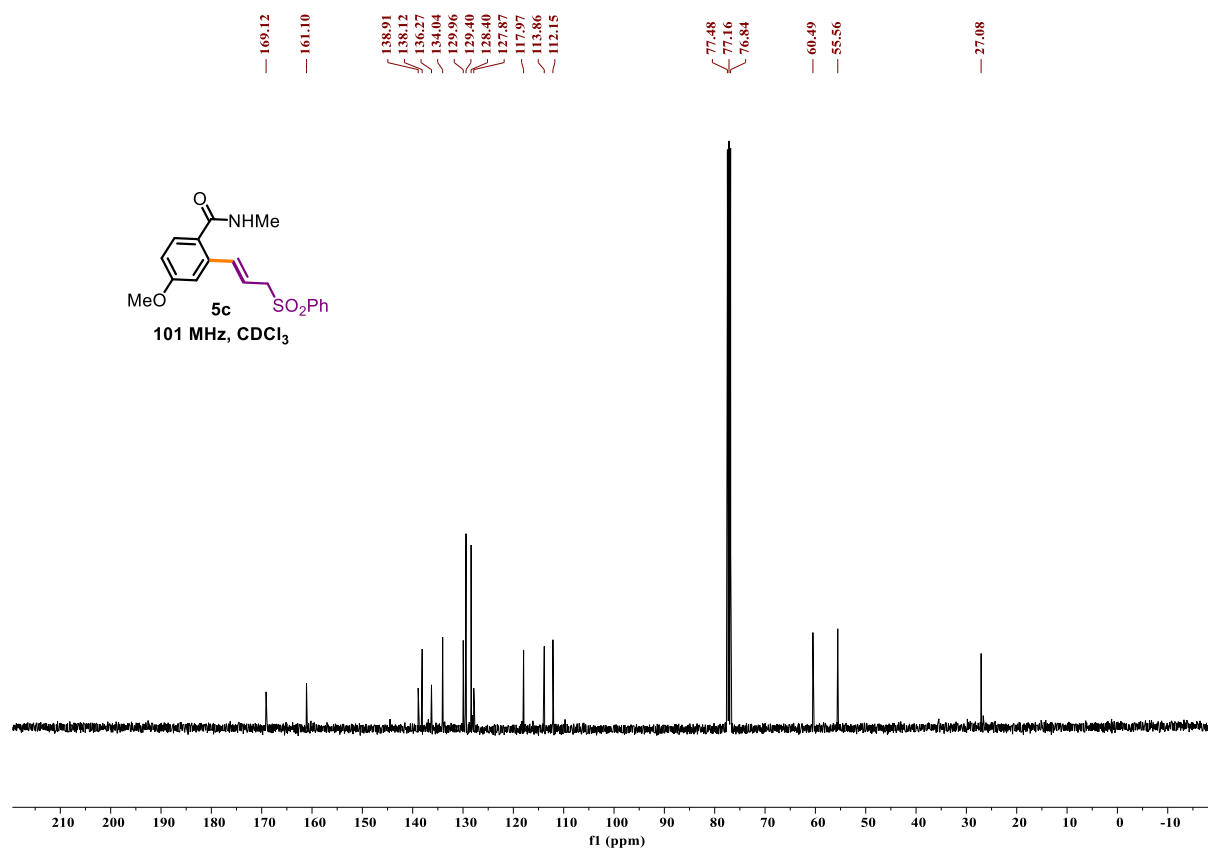



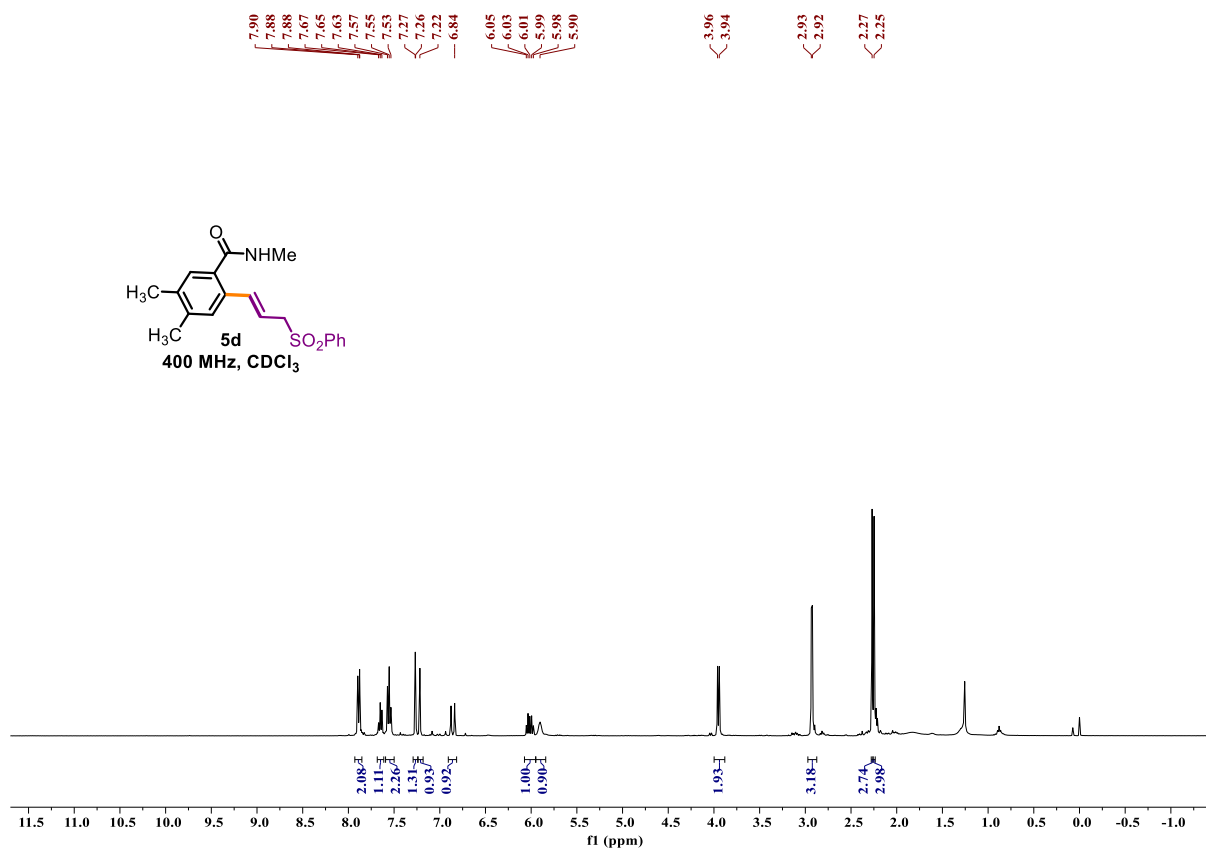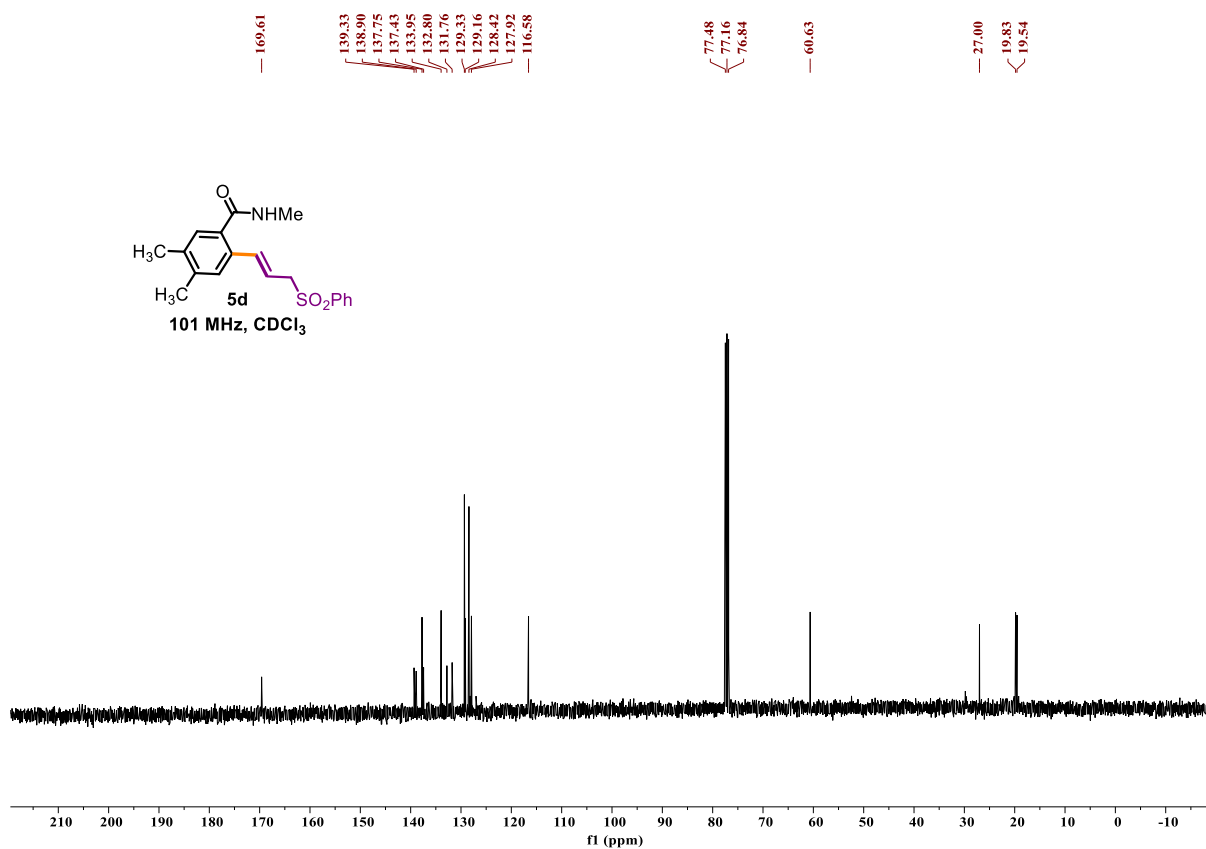

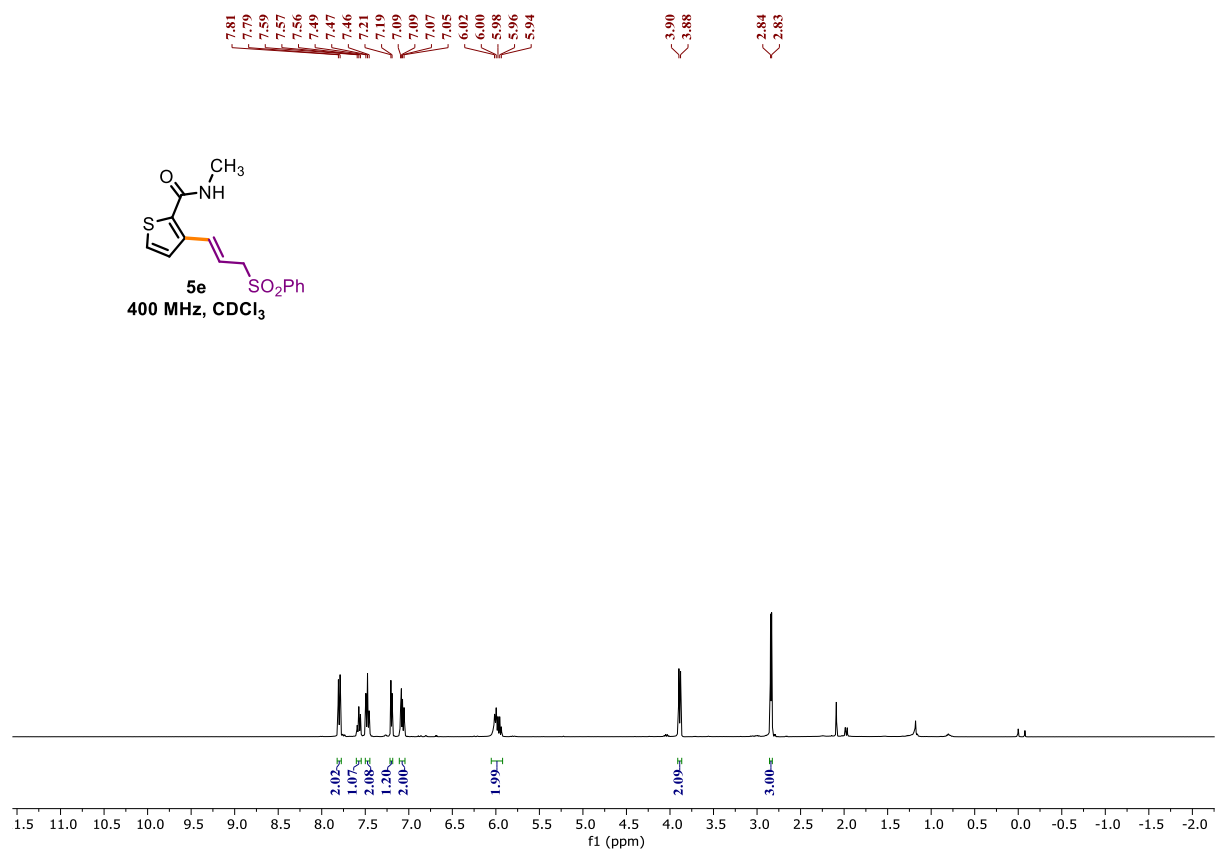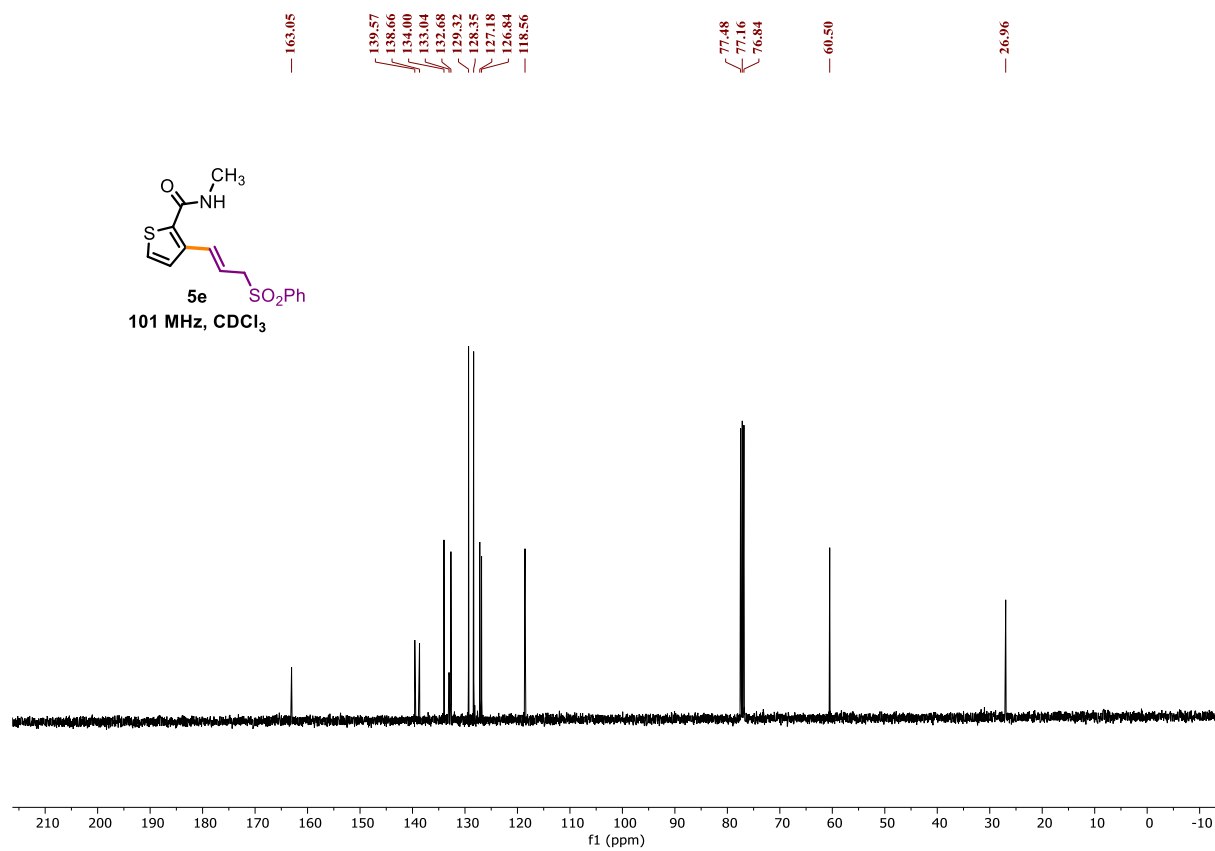

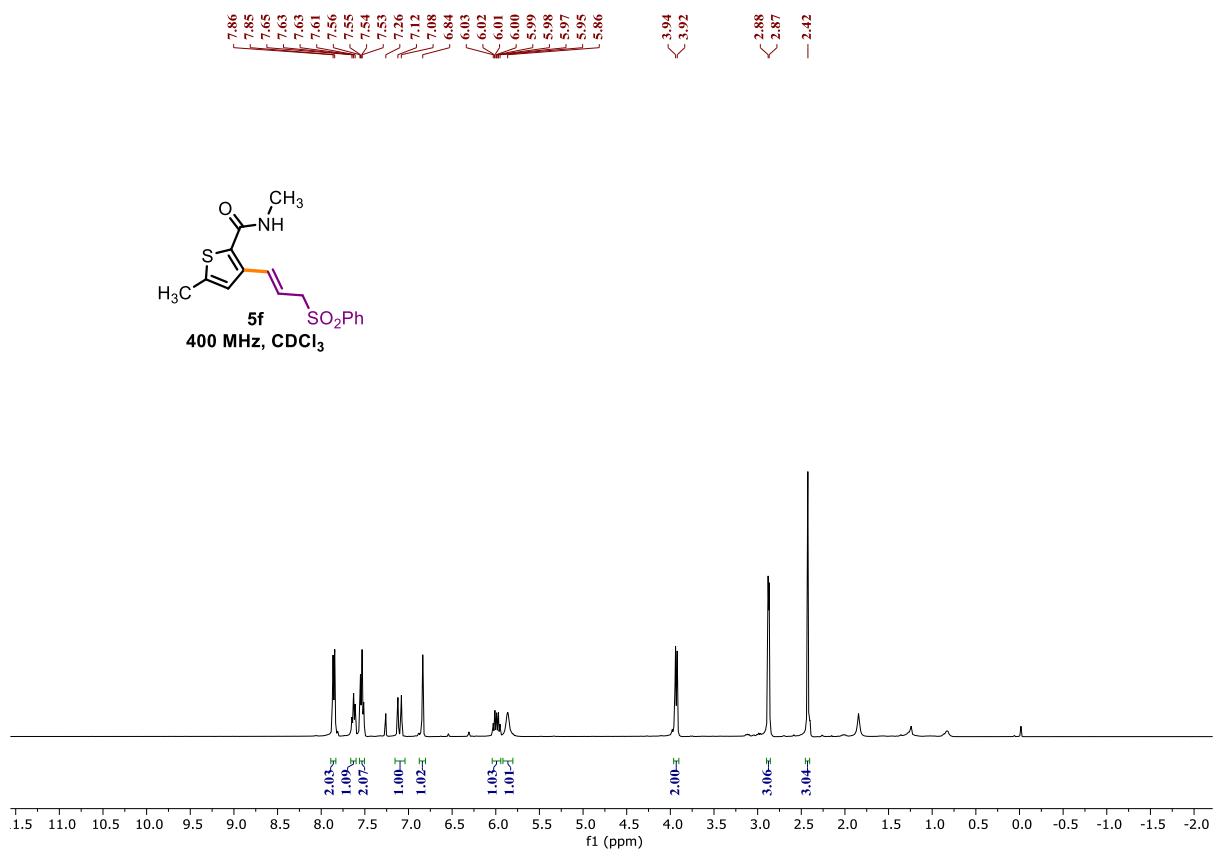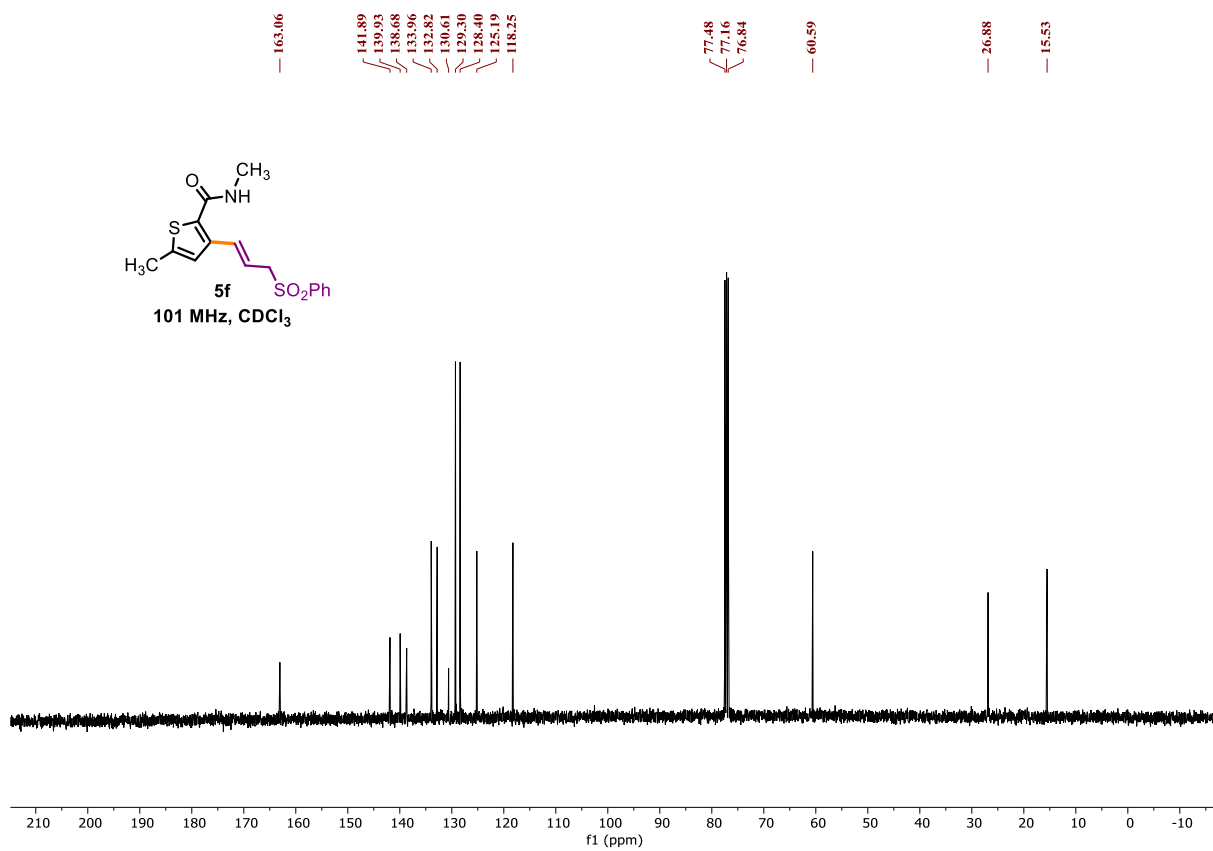

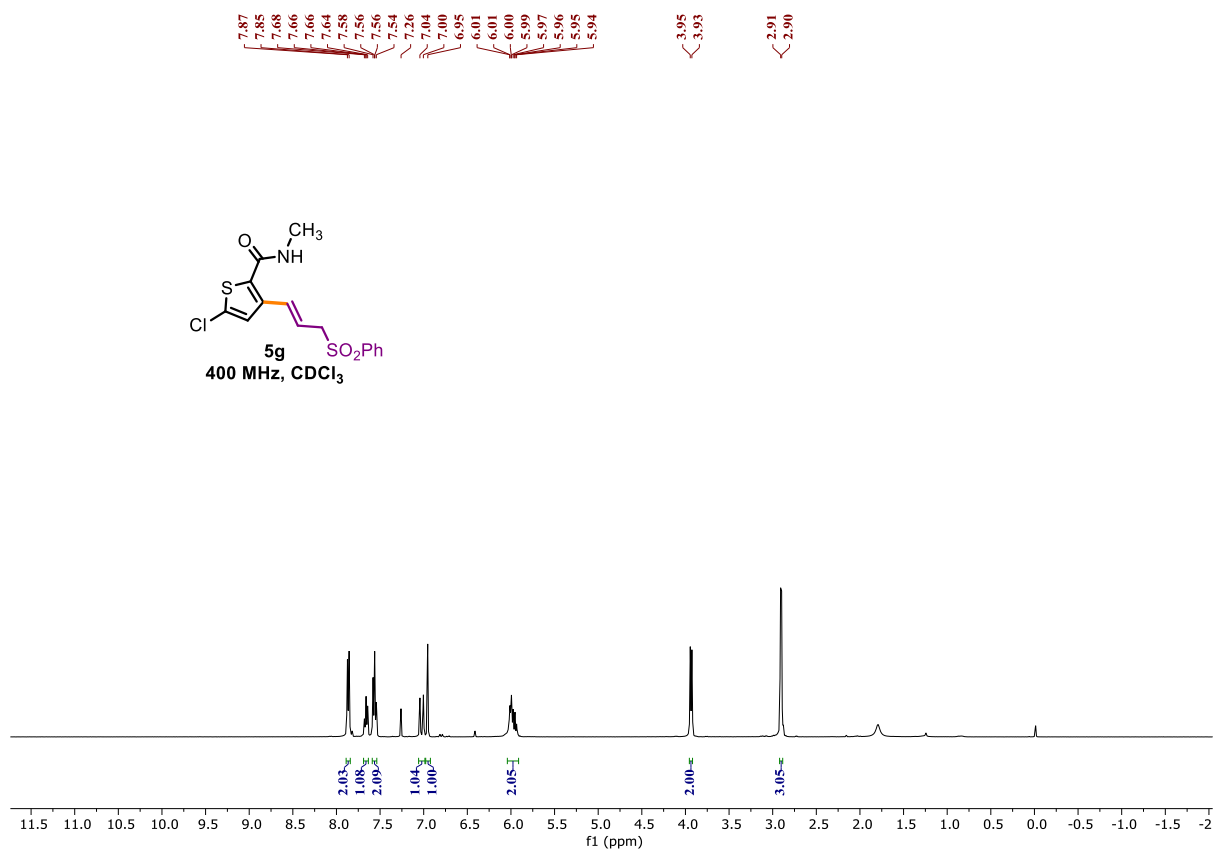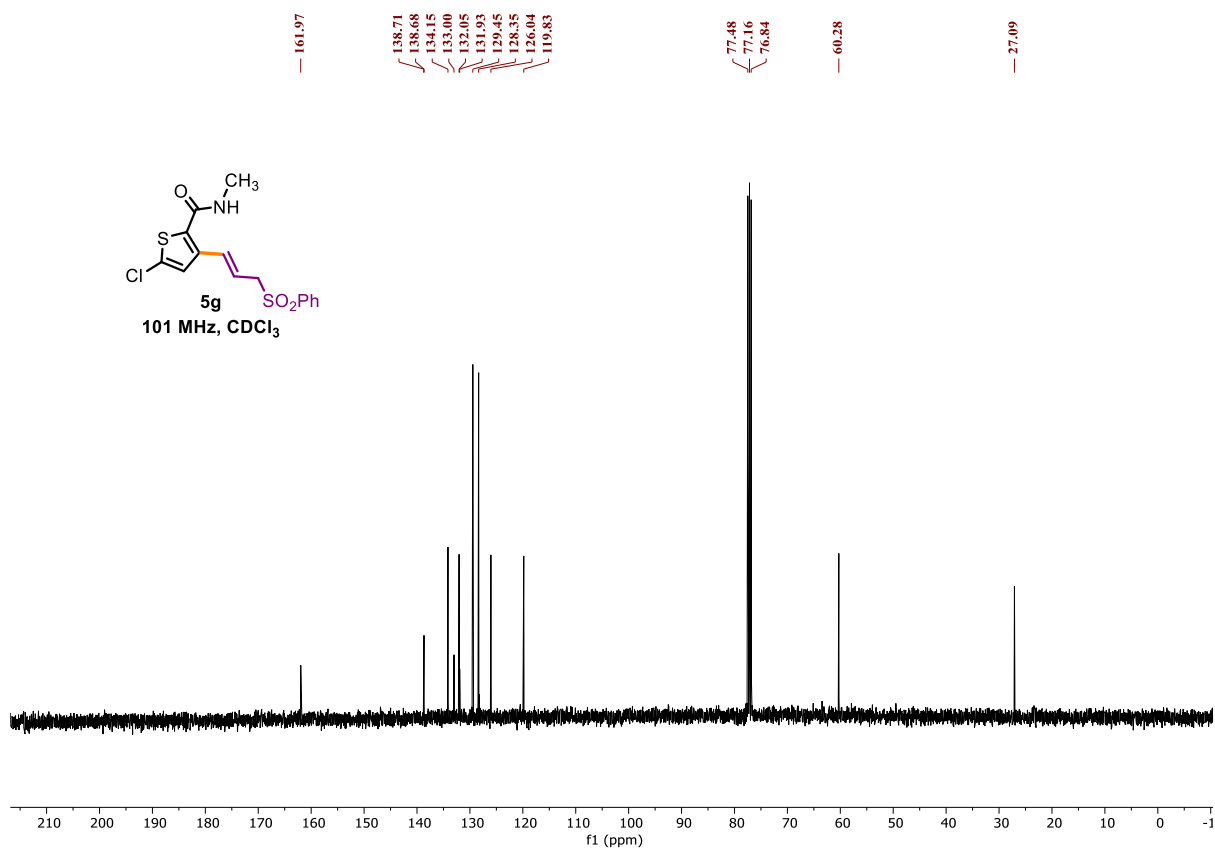

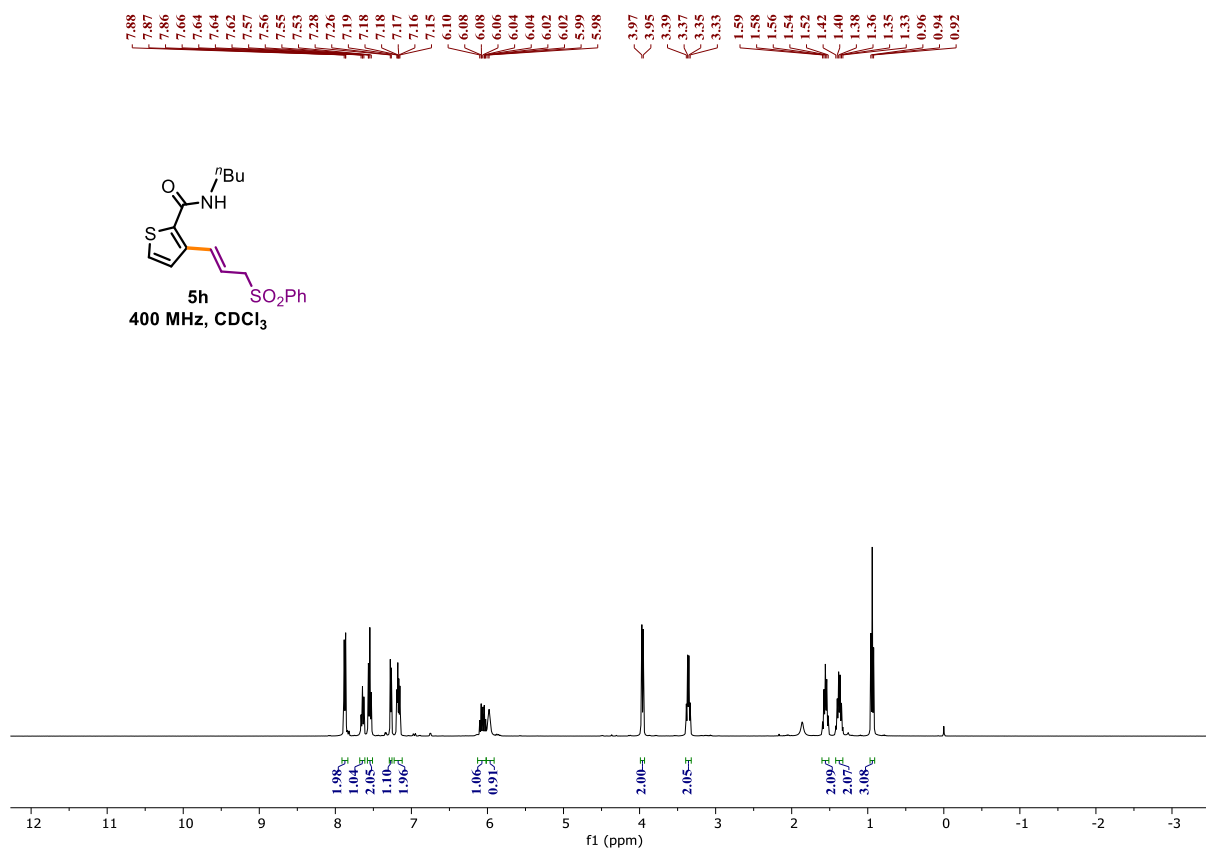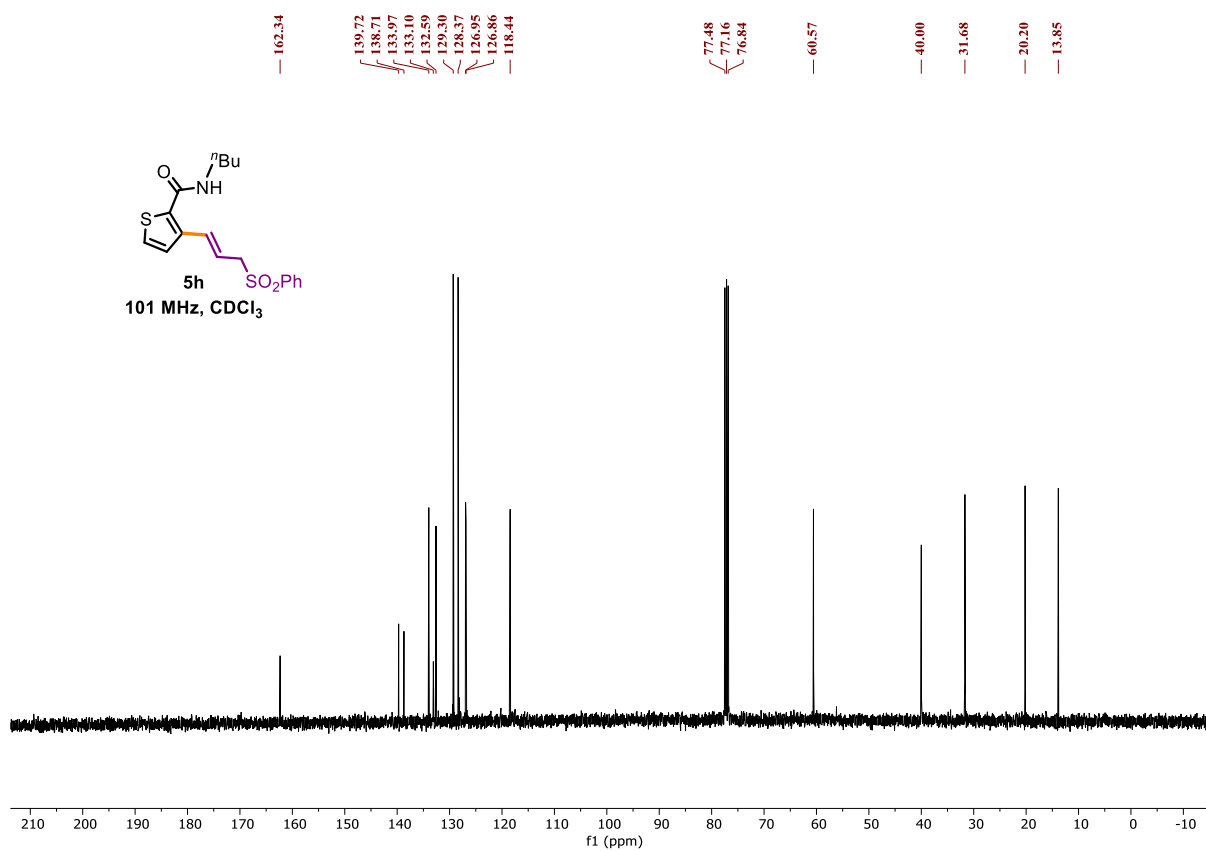

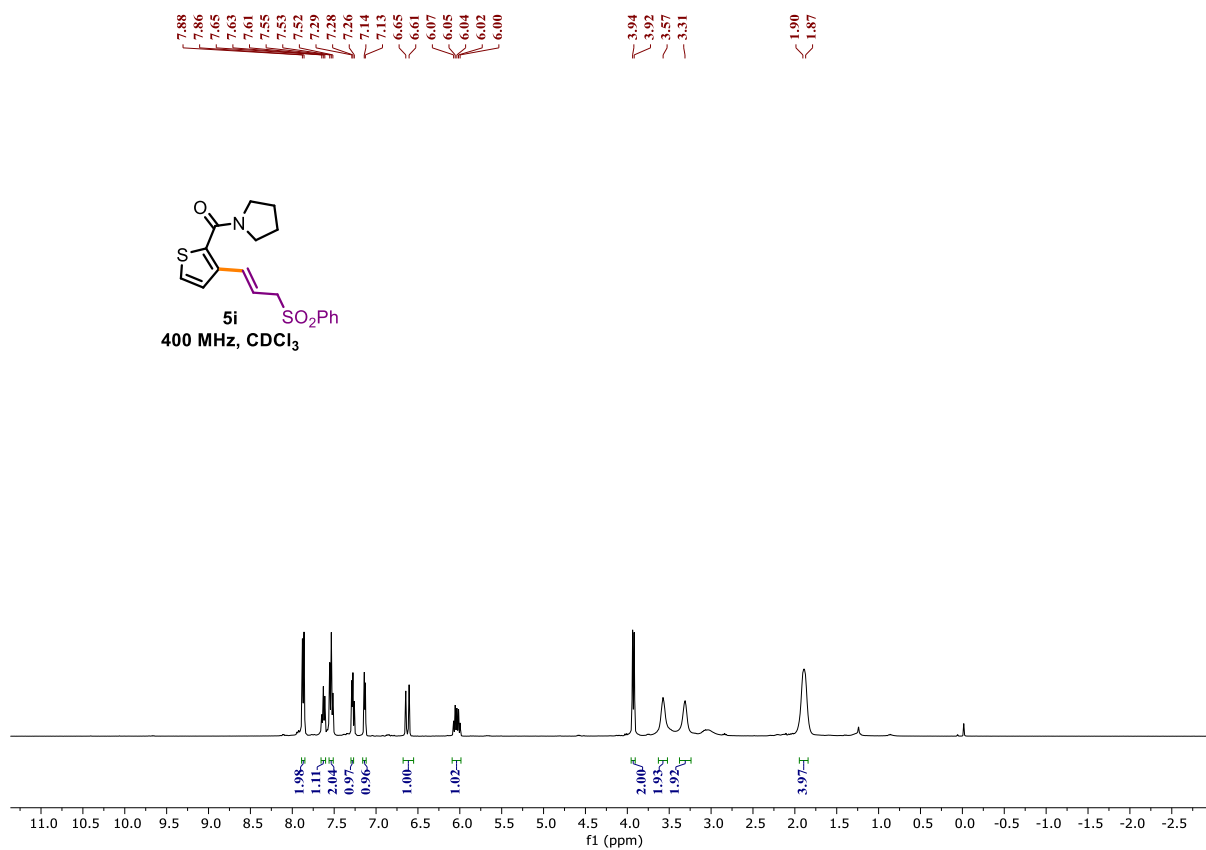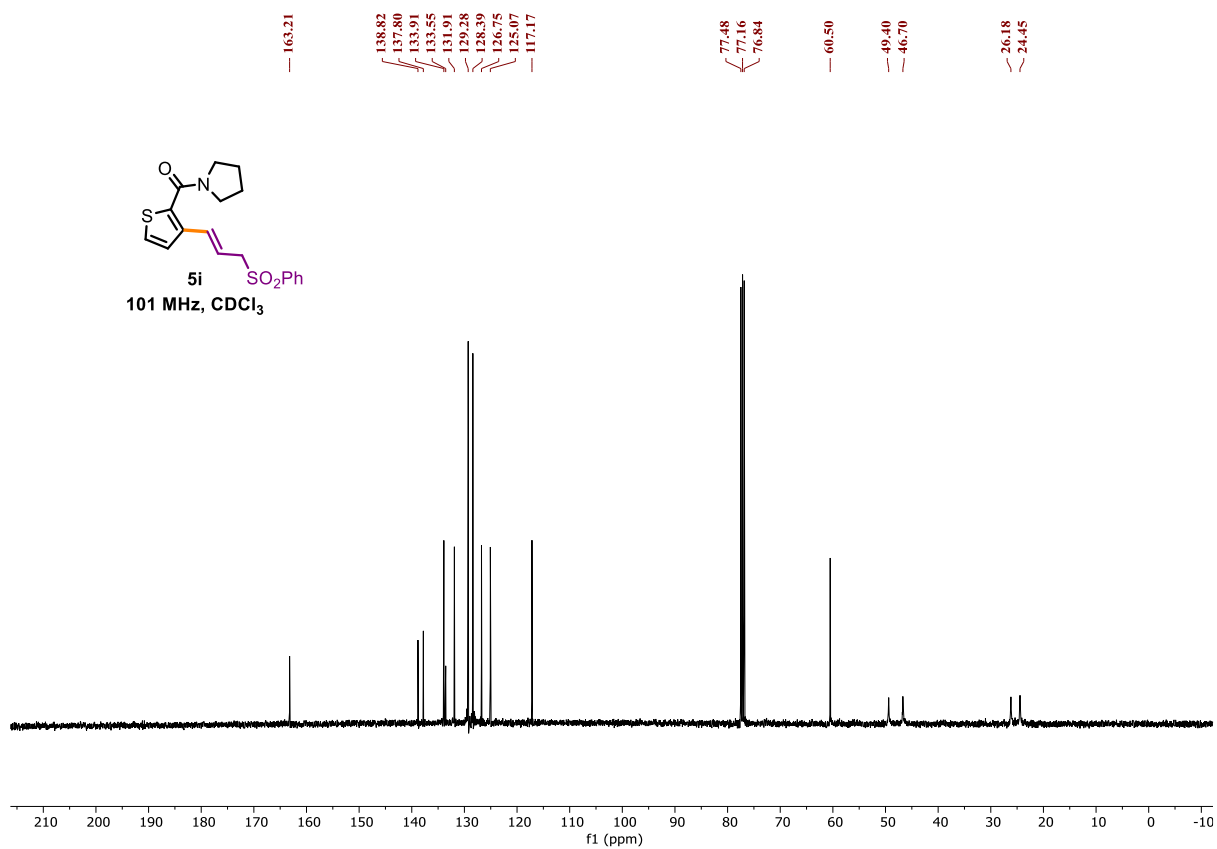

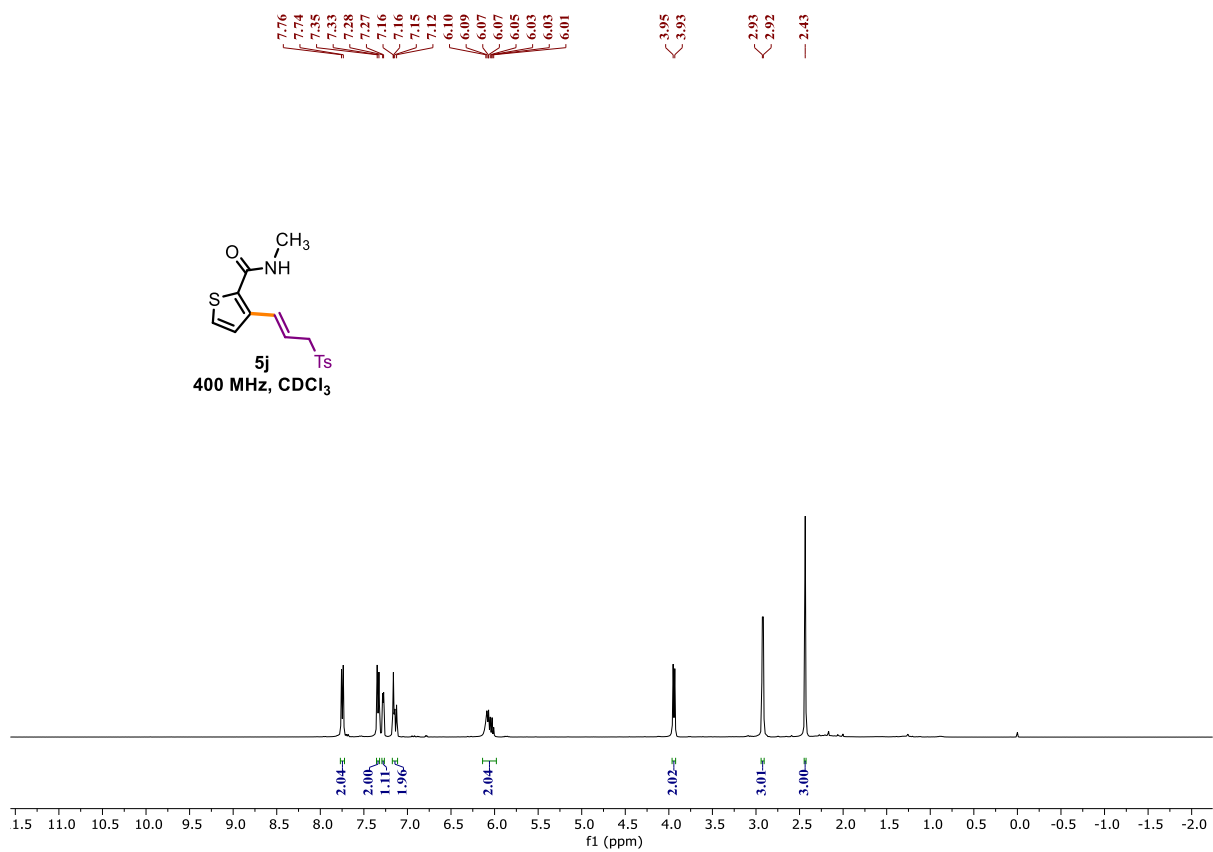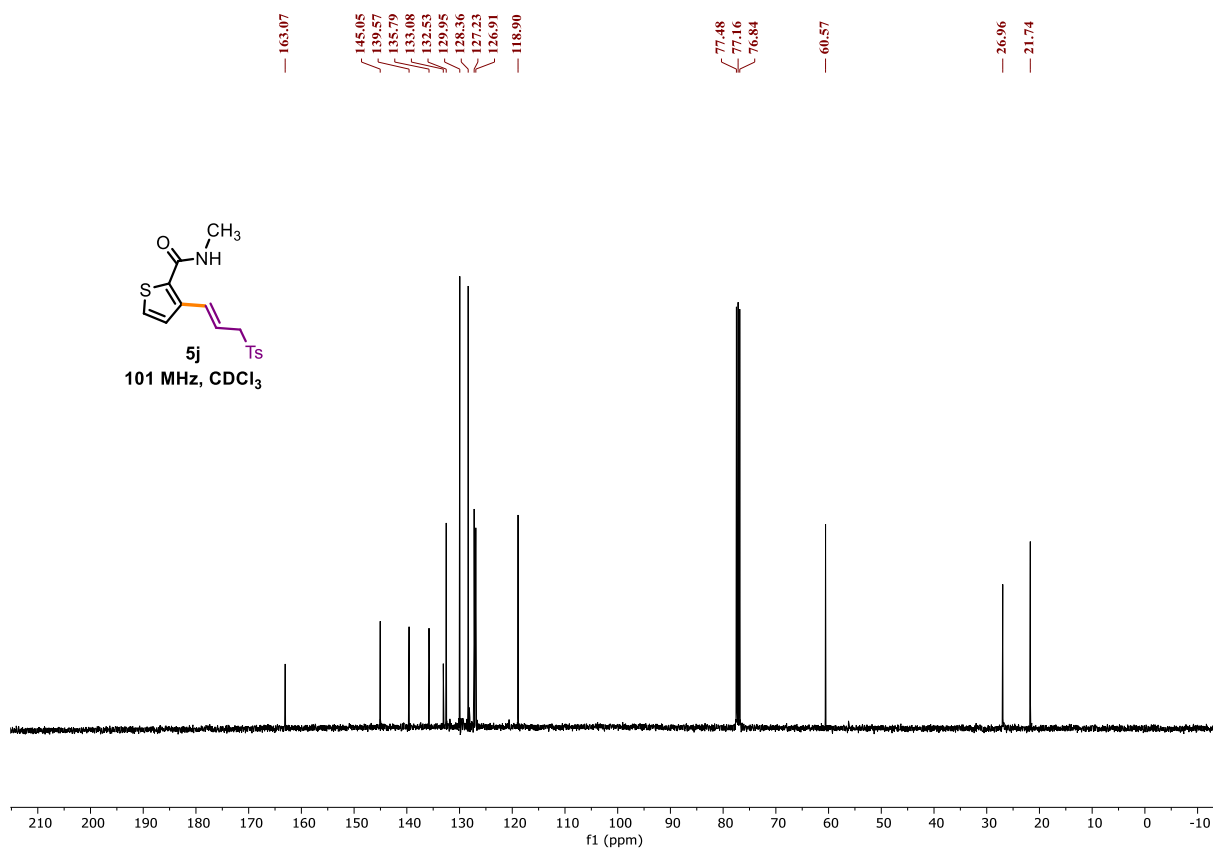

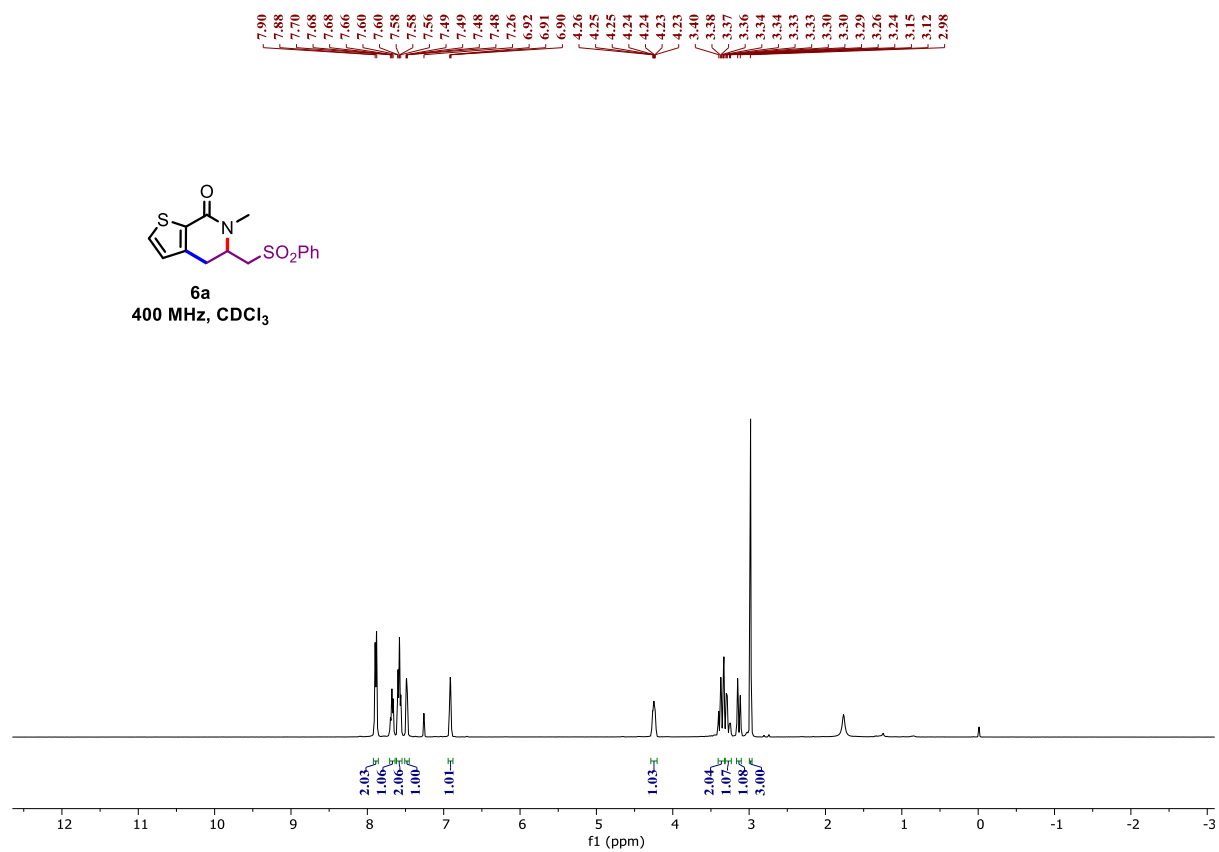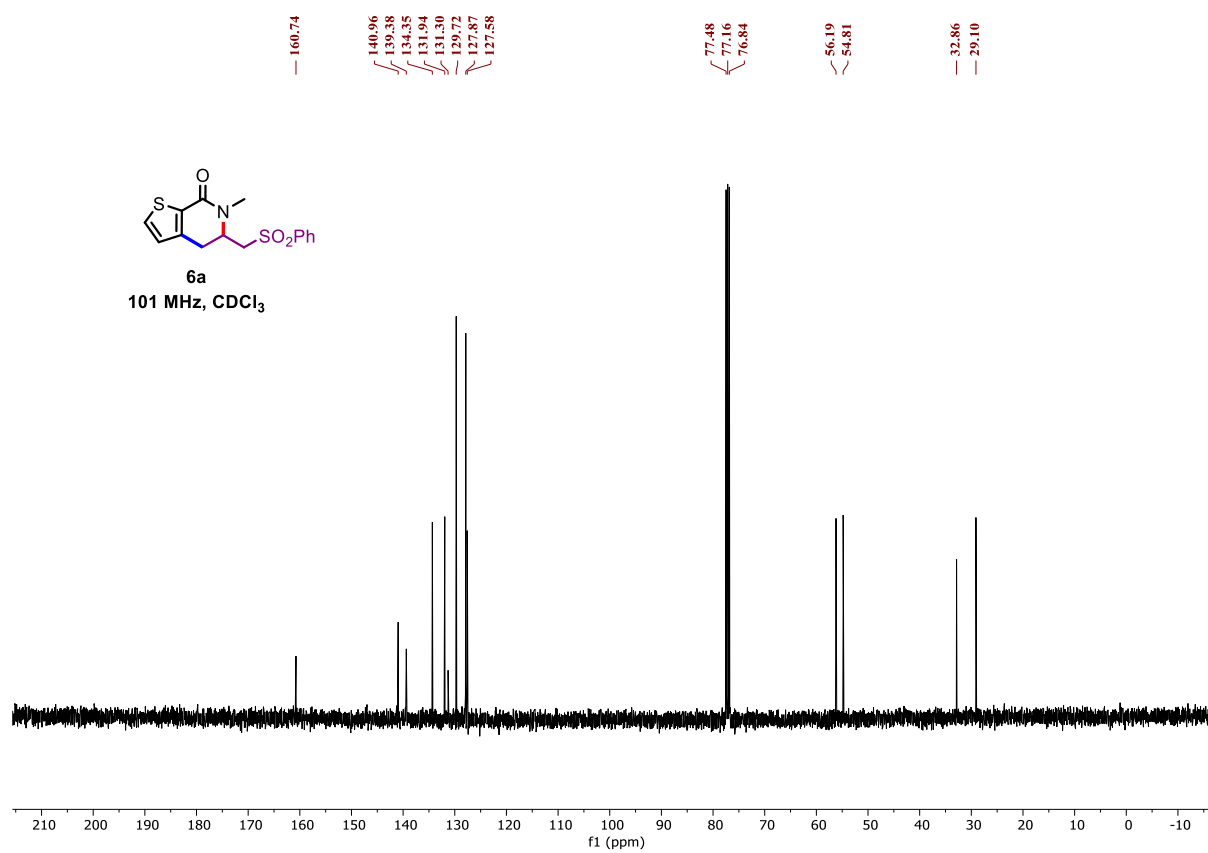



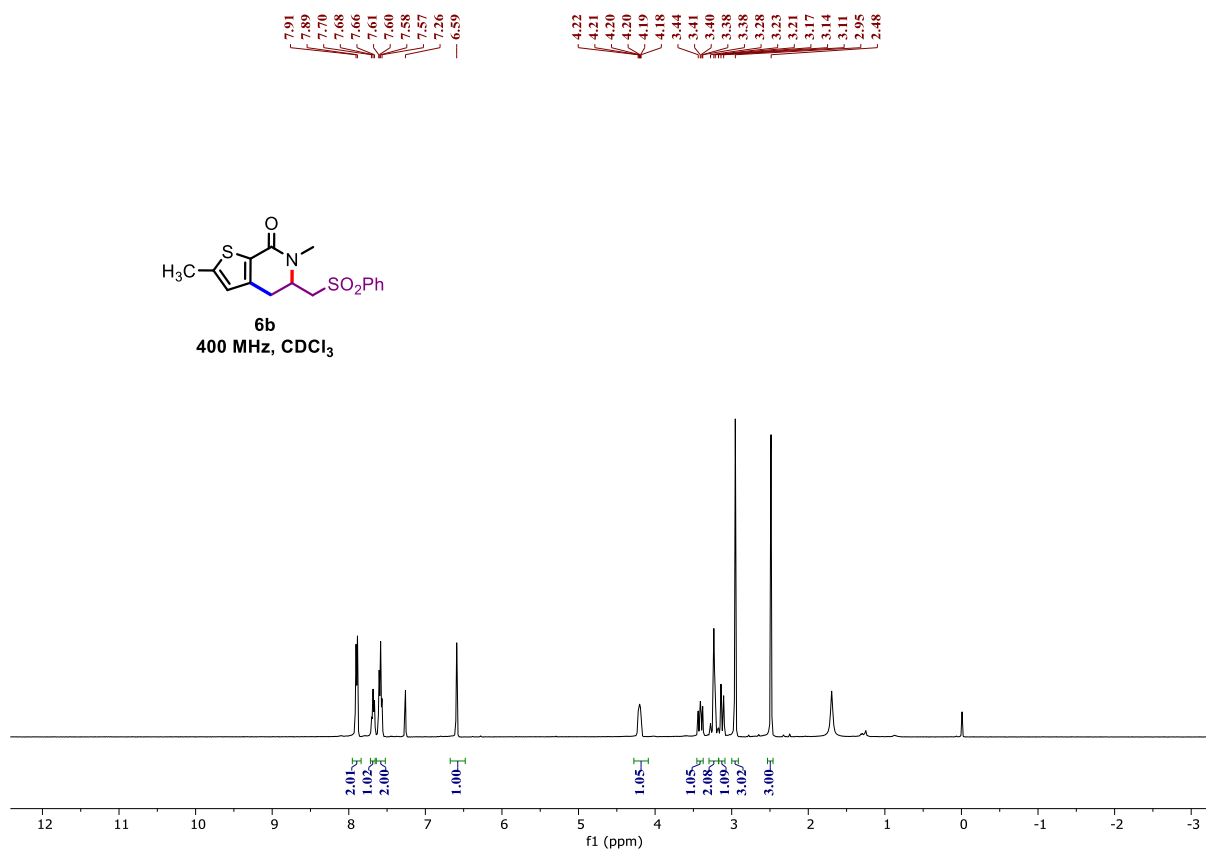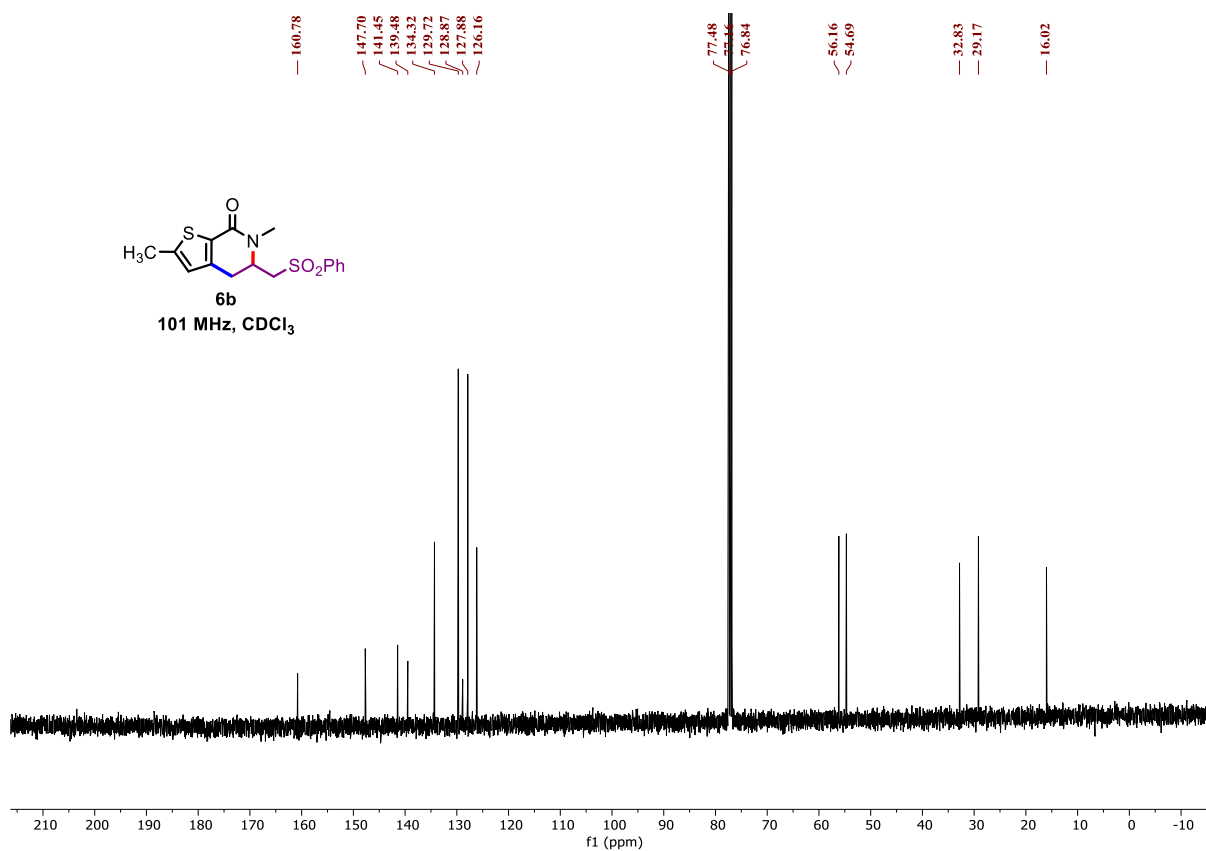

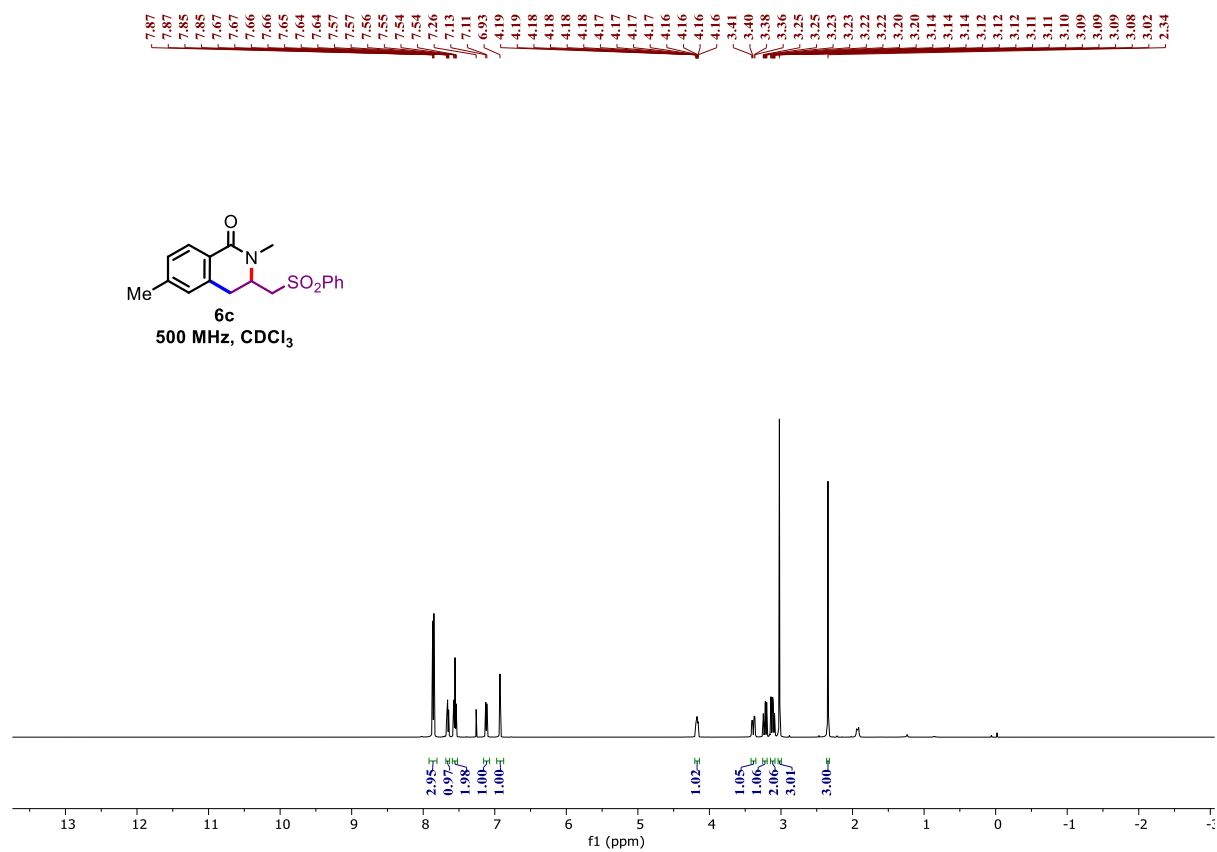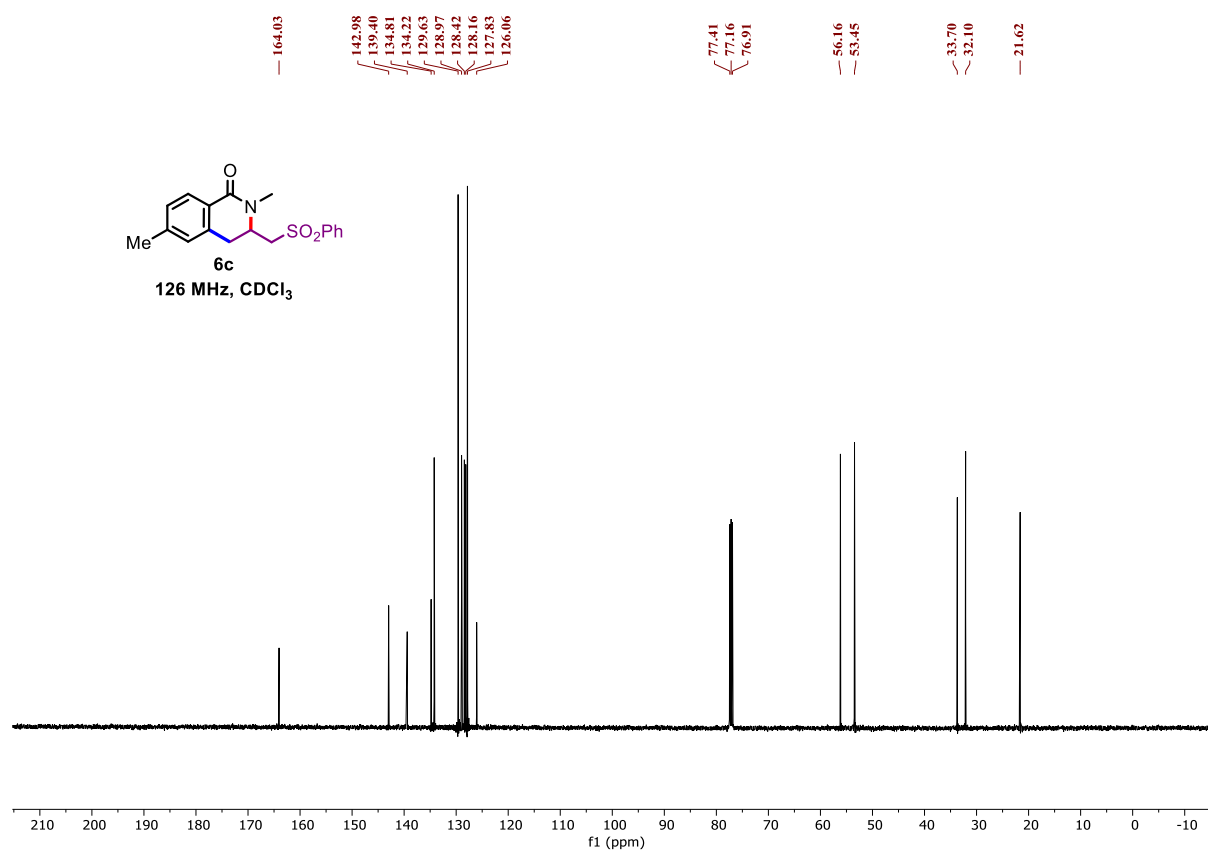

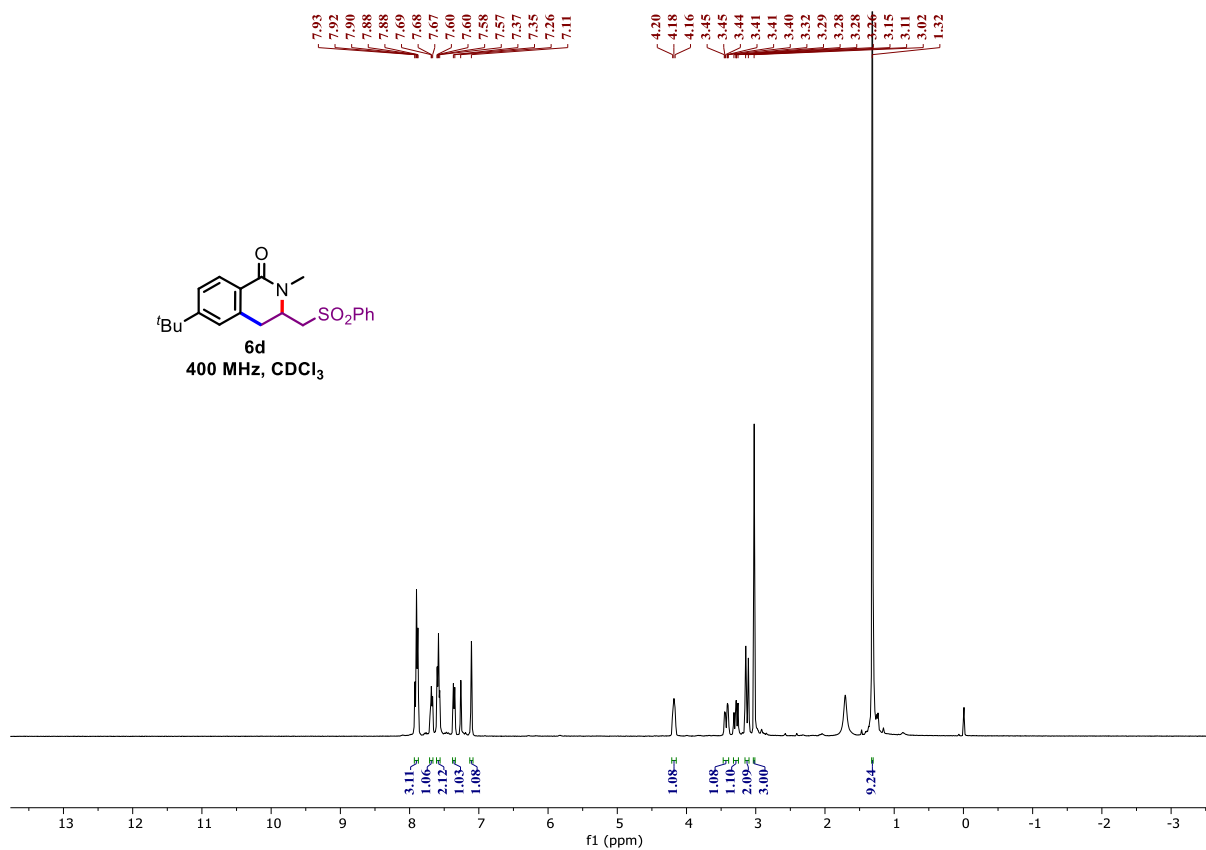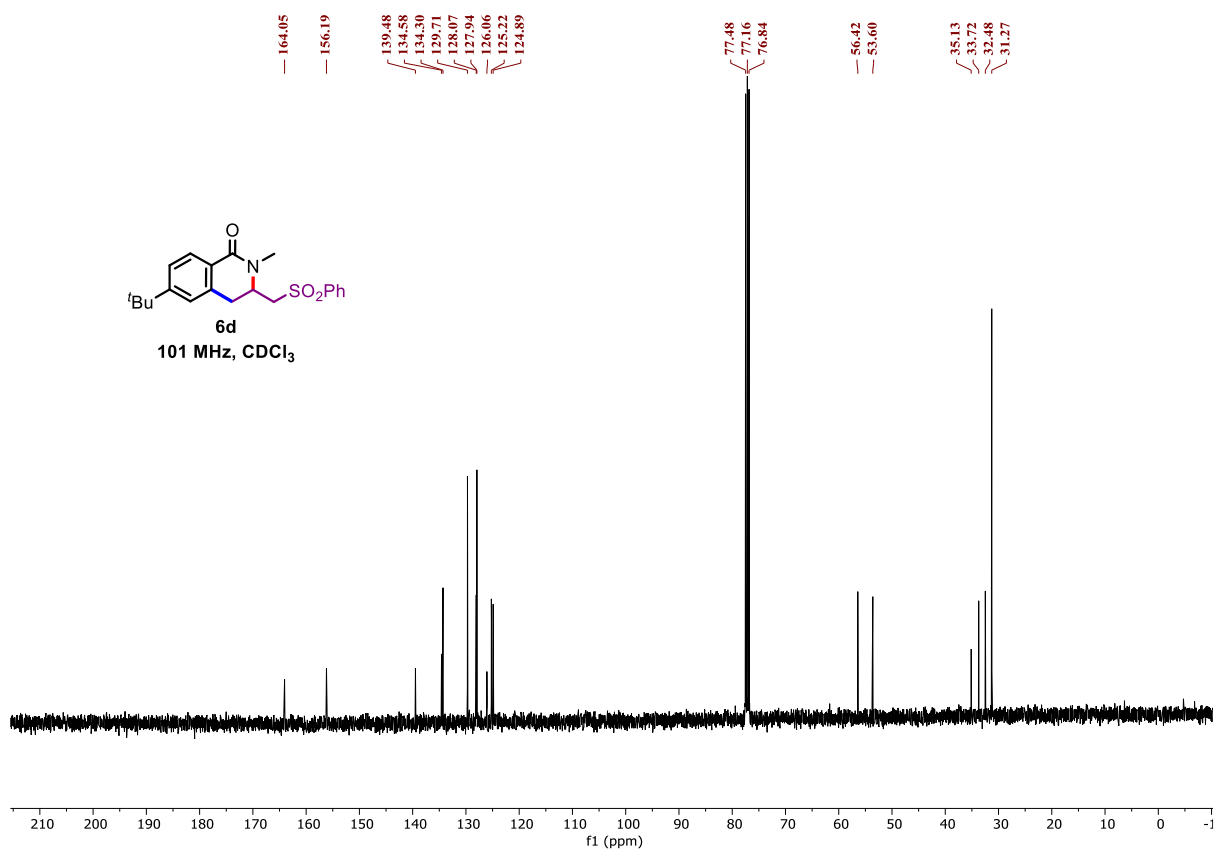

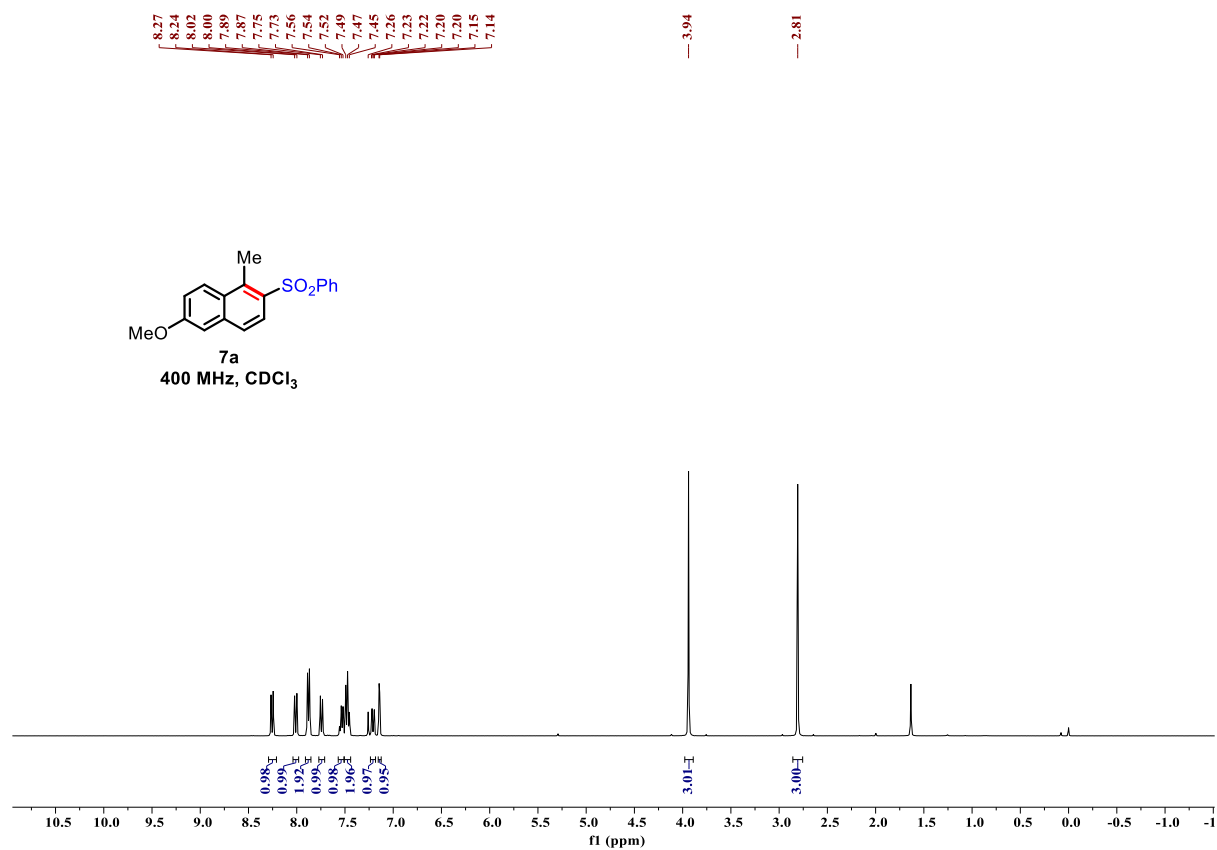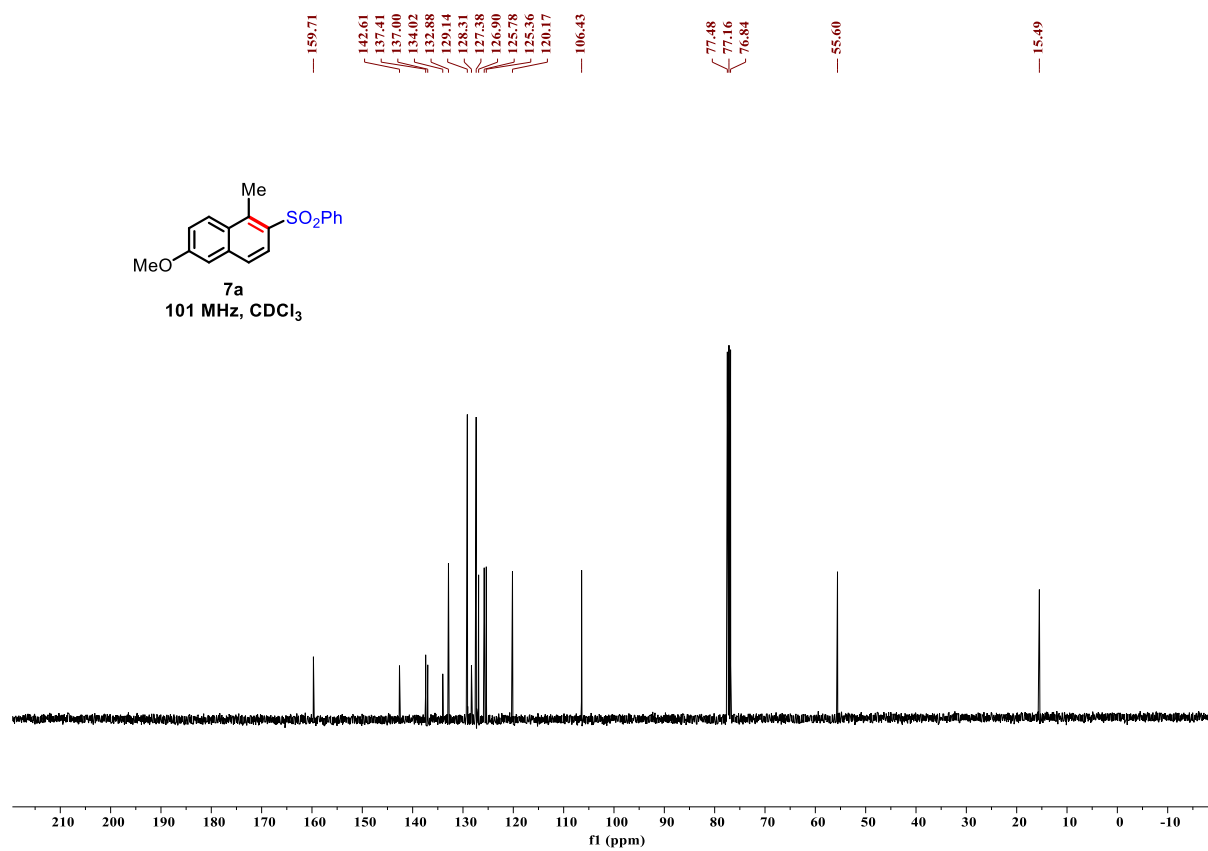

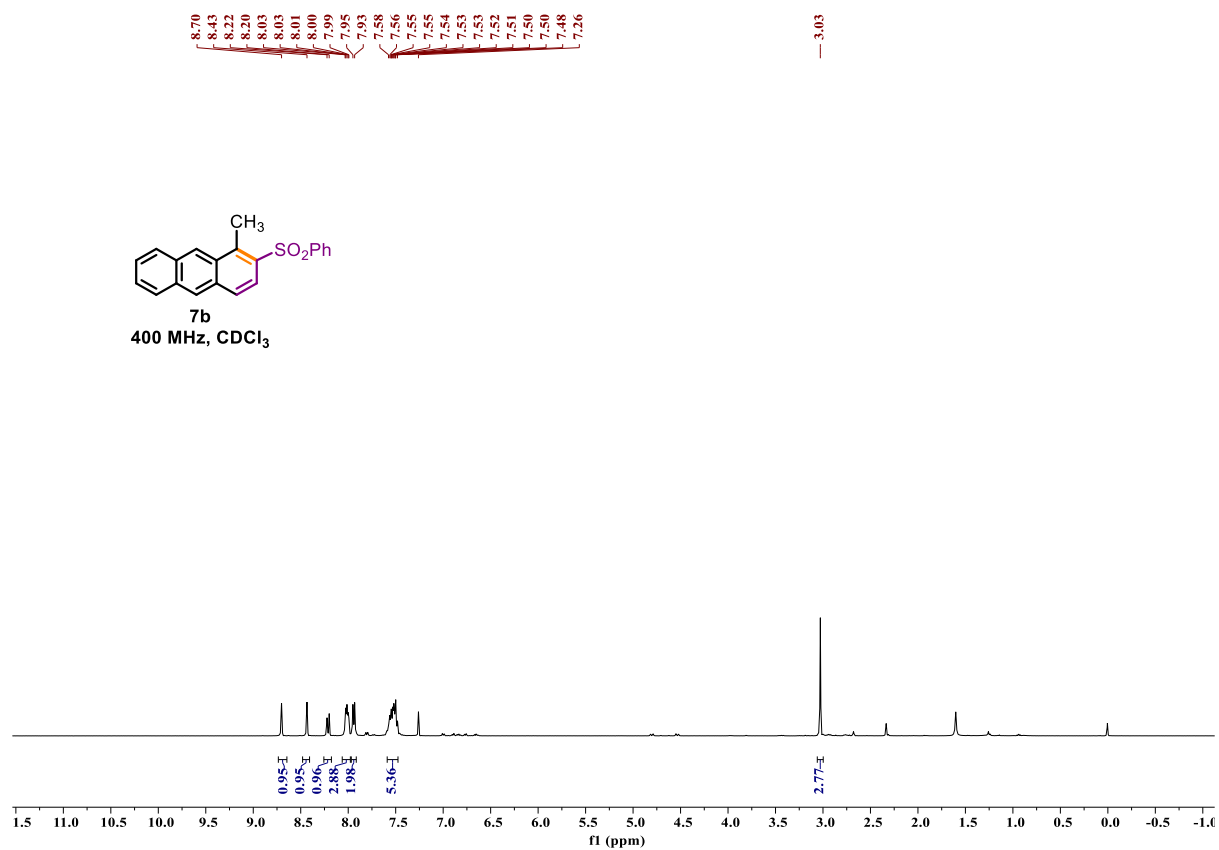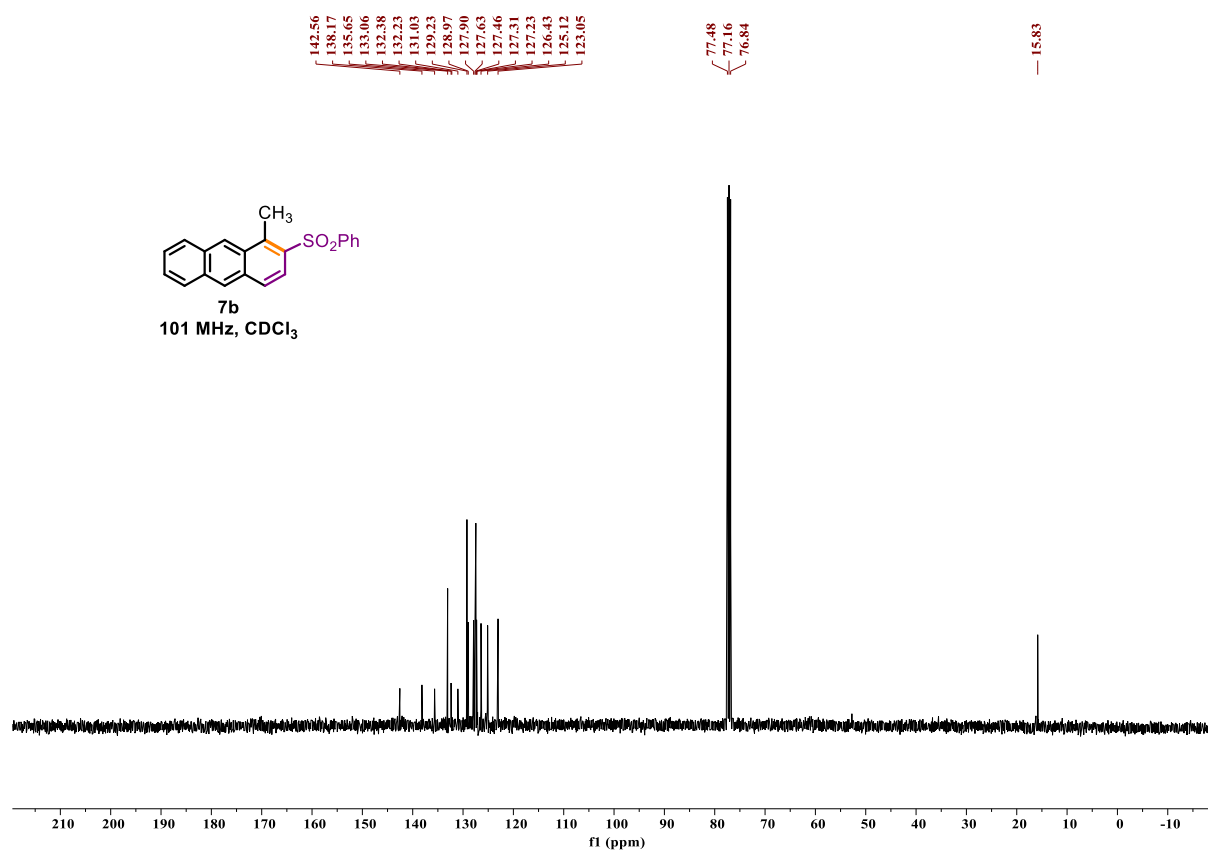

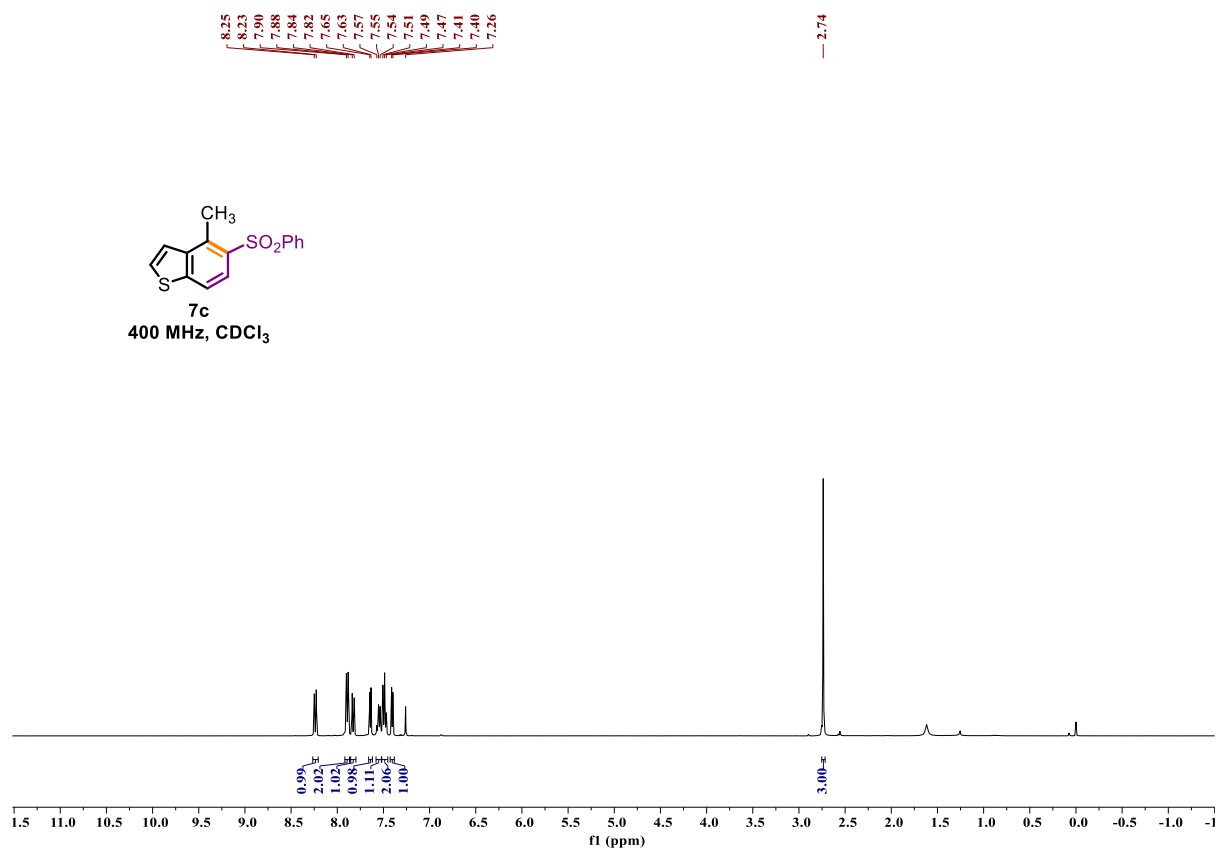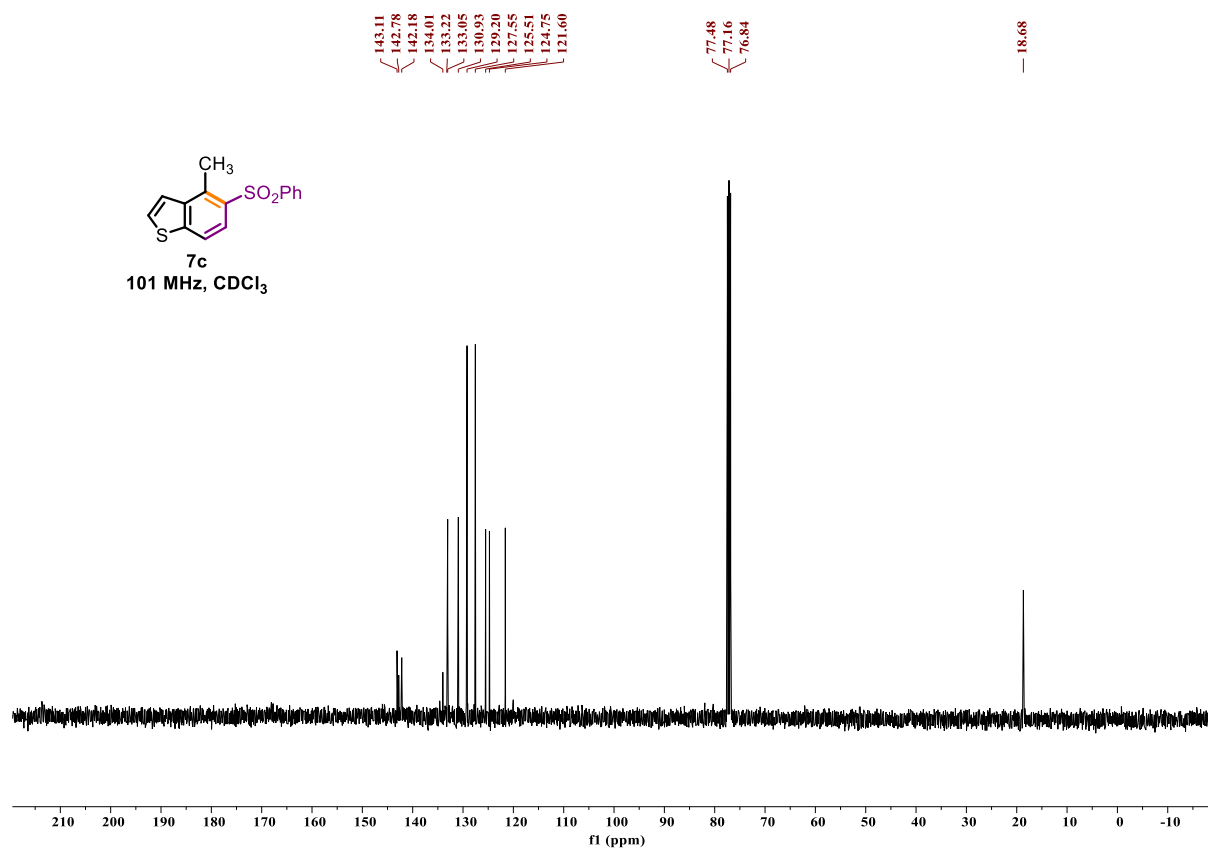

Supplement: Supplementary file 1 [file 30442420]
